# Supplementary material for: Selective fluoride sensing by a novel series of lanthanide-based one-dimensional coordination polymers through intramolecular proton transfer
Source: Royal Society of Chemistry journal article supplement (doi:10.1039/d4dt00598h), 2024-01-01
Supplement: d4dt00598h1.pdf [file d4dt00598h1.pdf]

# Selective fluoride sensing by a novel series of lanthanide-based one-dimensional coordination polymers through intramolecular proton transfer

*Vaibhav Singh,<sup>a</sup> Lakshmi Thachanadan Suresh,<sup>a</sup> Jean-Pascal Sutter,<sup>\*b</sup> Arun Kumar Bar<sup>\*a</sup>*

<sup>a</sup>Indian Institute of Science Education and Research Tirupati, Tirupati-517507, AP, India.

<sup>b</sup>Laboratoire de Chimie de Coordination du CNRS (LCC-CNRS), Université de Toulouse, CNRS, Toulouse, France. E-mail: a.bar@iisertirupati.ac.in

---

---

***SUPPORTING INFORMATION***

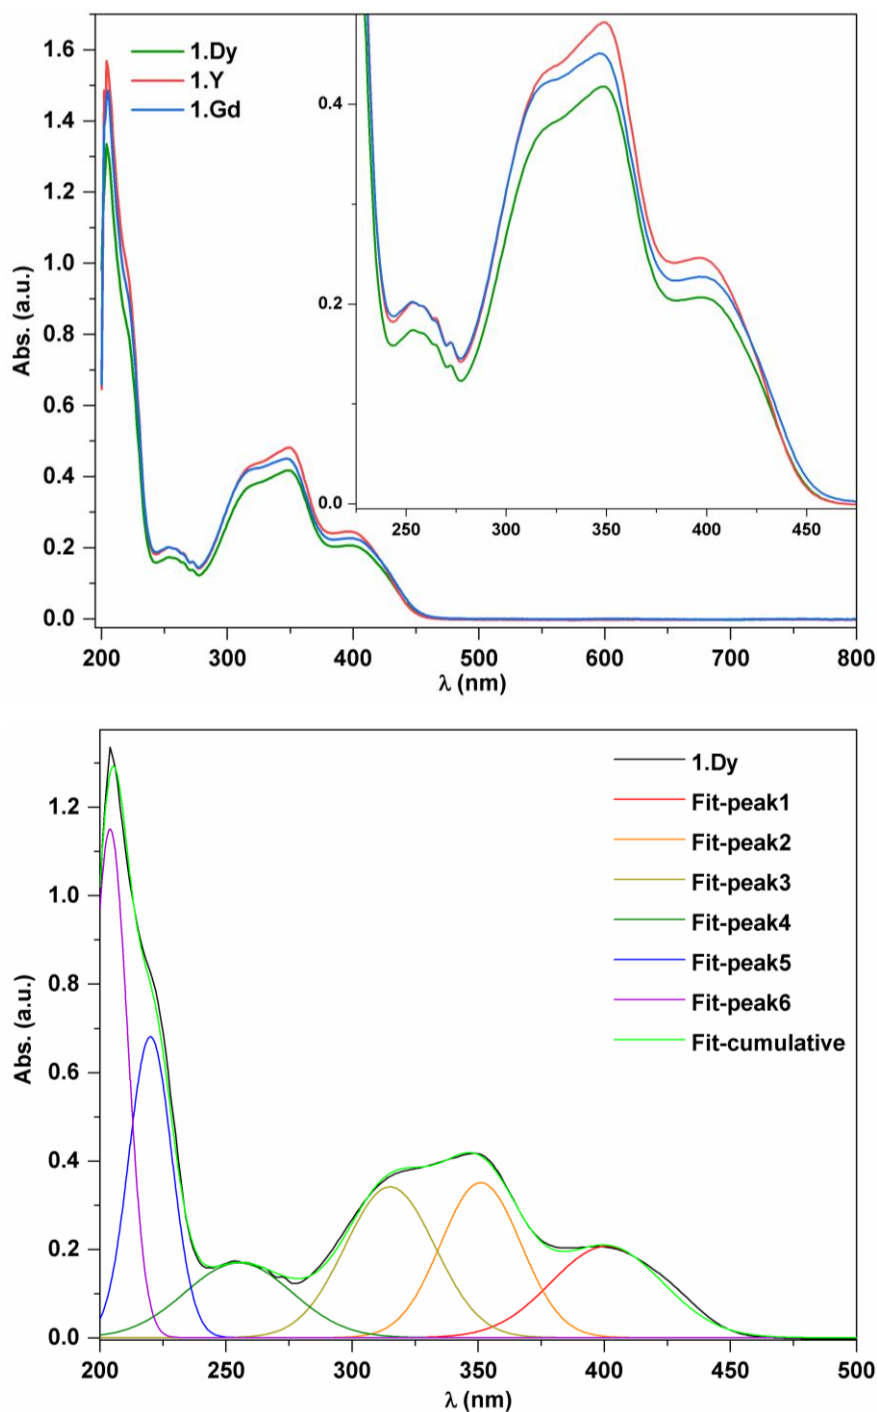

**Figure S1: Top:** The comparative UV-Vis absorption spectra of the methanolic solutions (12.5 μM) of **1·Y** (red), **1·Dy** (black) and **1·Gd** (blue), recorded at room temperature. The insets are the zoomed-in absorptions in the 225-475 nm regions. **Bottom:** The room temperature UV-Vis absorption spectrum of the methanolic solution (12.5 μM) of **1·Dy** (black) along with the best fit (fluorescent green) for its deconvoluted peaks at  $\lambda_{max}^{abs}$  (nm) = 401 (red); 351 (orange); 315 (yellow); 255 (green); 220 (blue) and 204 (violet); The characteristic data and measurement details are provided in experimental section.

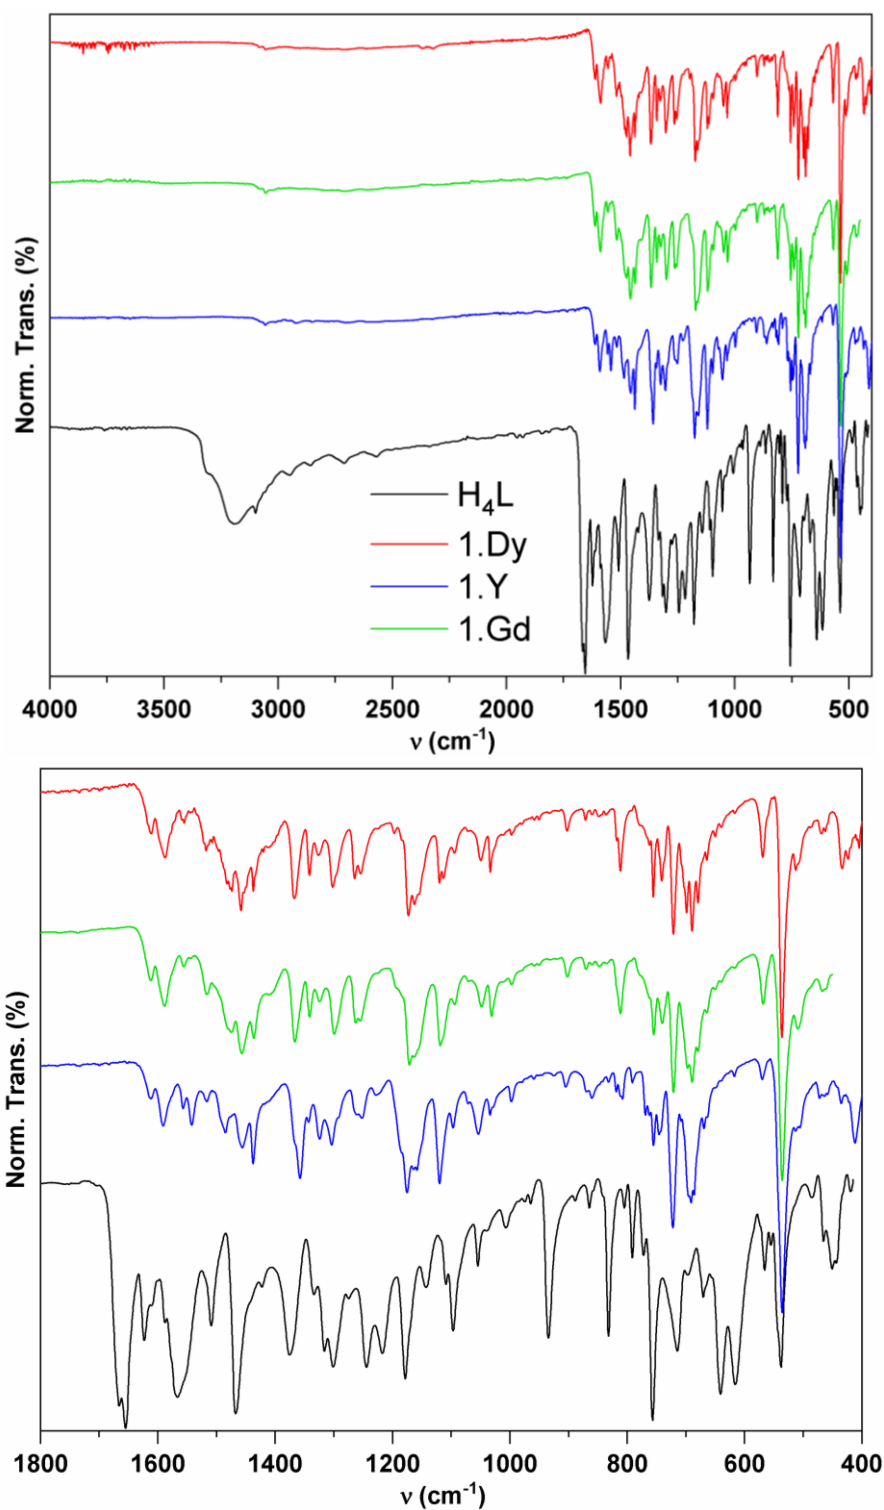

**Figure S2.** Comparative solid-state FT-IR spectra (4000 – 400 cm<sup>-1</sup> on the top and 1800-400 cm<sup>-1</sup> at the bottom) of the as synthesized Schiff base ligand **H<sub>4</sub>L** (black), **1·Dy** (red), **1·Gd** (green) and **1·Y**(blue) recorded at room temperature.

**Table S1:** The characteristic stretching frequencies corresponding to the C=O and C=N functional groups in the Schiff base ligands and in the complexes. The assignment of the stretching frequencies is based on the reported literature.

| Compound                                                             | $\nu_{C=O}(\text{cm}^{-1})$ | $\nu_{C=N}(\text{cm}^{-1})$ |
|----------------------------------------------------------------------|-----------------------------|-----------------------------|
| <b>H<sub>4</sub>L</b>                                                | 1640(vs),1608(s)            | 1573(m),1552(vs)            |
| <b>[(H<sub>2</sub>L)Y(NO<sub>3</sub>)(TPPO)]<sub>∞</sub> (1.Y)</b>   | 1557(w),1542(m)             | 1612(w),1591(m)             |
| <b>[(H<sub>2</sub>L)Dy(NO<sub>3</sub>)(TPPO)]<sub>∞</sub> (1.Dy)</b> | 1555(w)                     | 1612(w) ,1590(m)            |
| <b>[(H<sub>2</sub>L)Gd(NO<sub>3</sub>)(TPPO)]<sub>∞</sub> (1.Gd)</b> | 1556(w)                     | 1612(w),1588(m)             |

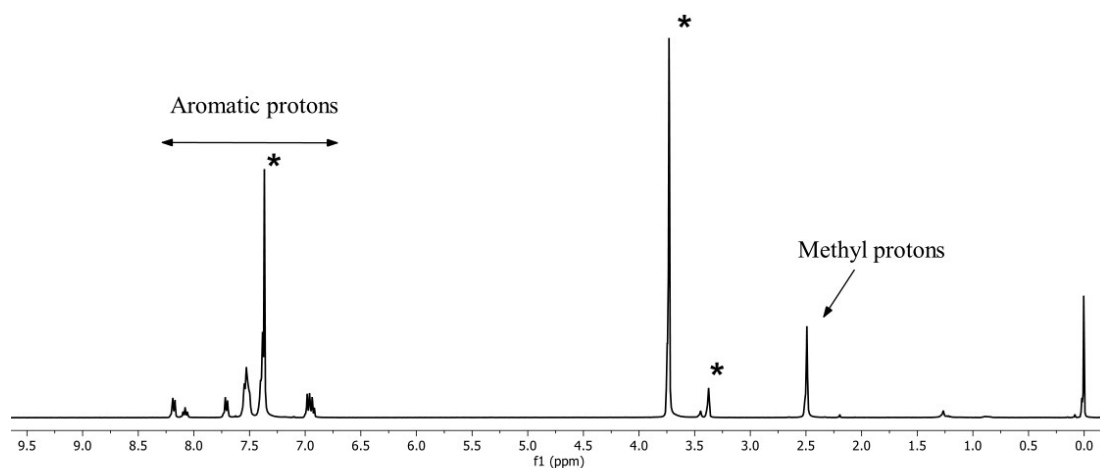

**Figure S3:** The room temperature solution <sup>1</sup>H NMR spectra of the complexes of Y analogue **1·Y** (top, recorded in CDCl<sub>3</sub>/MeOD (5:1)). The solvent peaks/grease are indicated by asterisks

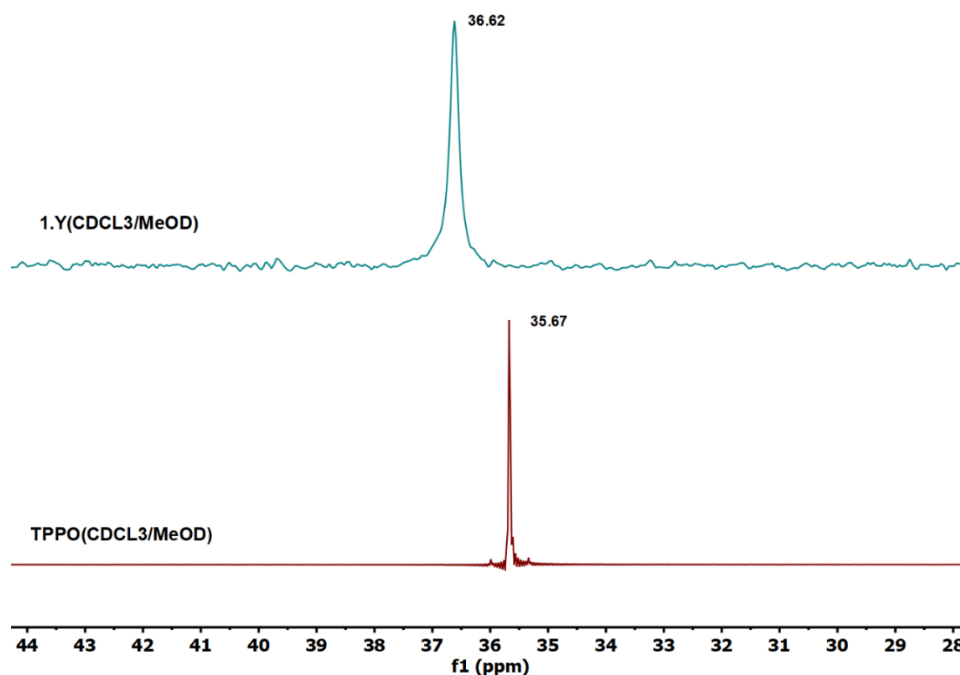

**Figure S4:** The comparative <sup>31</sup>P NMR spectra of TPPO (red) and **1·Y** (blue) recorded in CDCl<sub>3</sub>/MeOD(5:1) solution at room temperature.

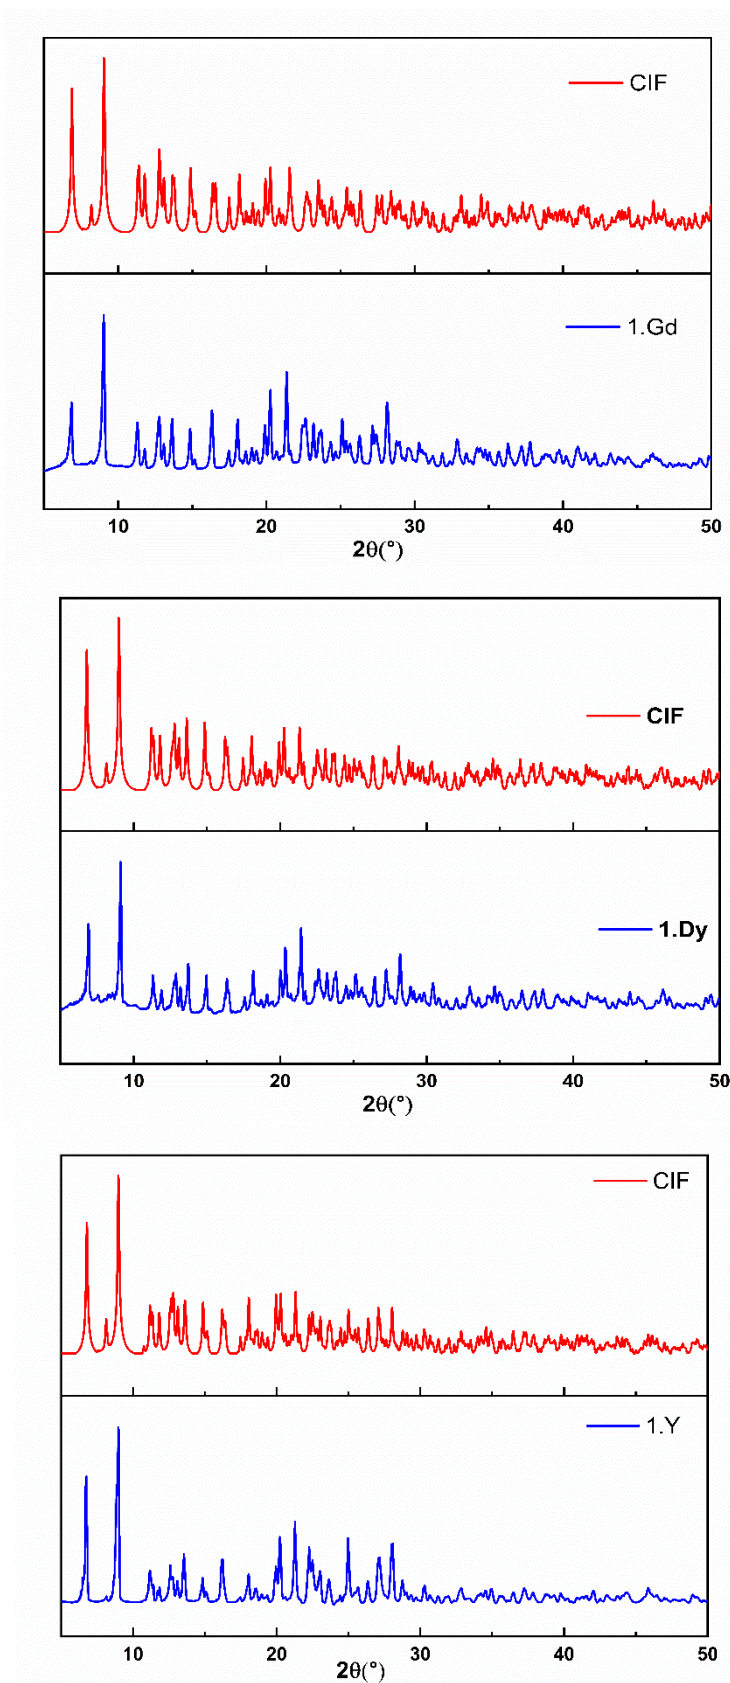

**Figure S5:** The powder X-ray diffraction patterns of the complexes **1·Gd** (*top*), **1·Dy** (*middle*) and **1·Y** (*bottom*) recorded at room temperature. Colour codes: experimental, blue; and simulated, red.

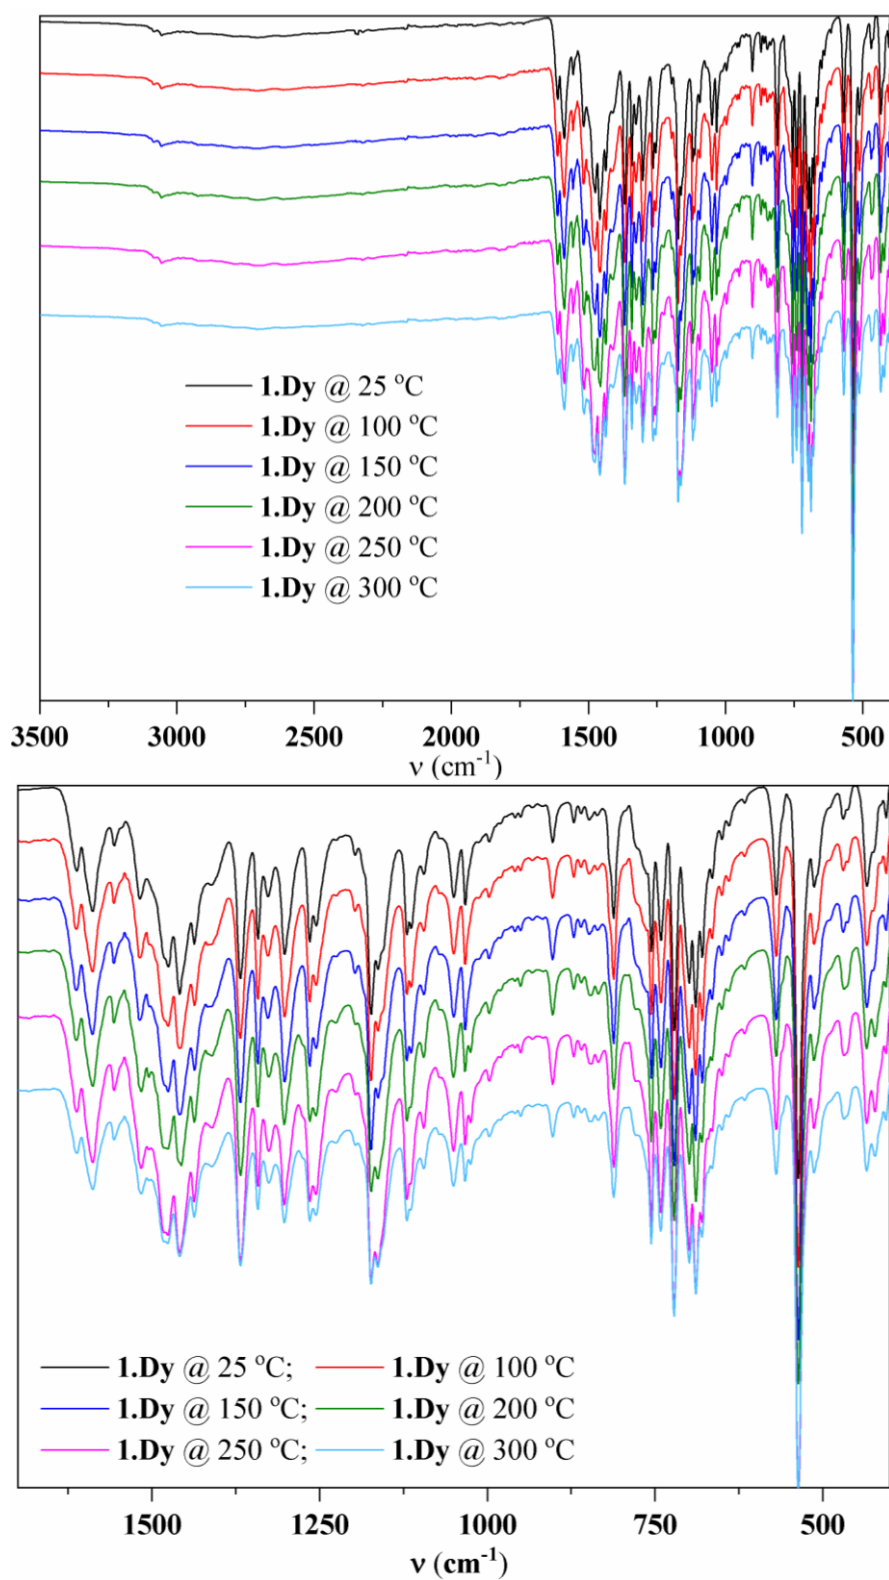

**Figure S6:** The variable temperature comparative solid-state FT-IR spectra (3500 – 400 cm<sup>-1</sup> on the top and 1700-400 cm<sup>-1</sup> at the bottom) of the complex **1·Dy** recorded at 25 °C (black), 100 °C (red), 150 °C (blue), 200 °C (green) 250 °C (magenta) and 300 °C (cyan).

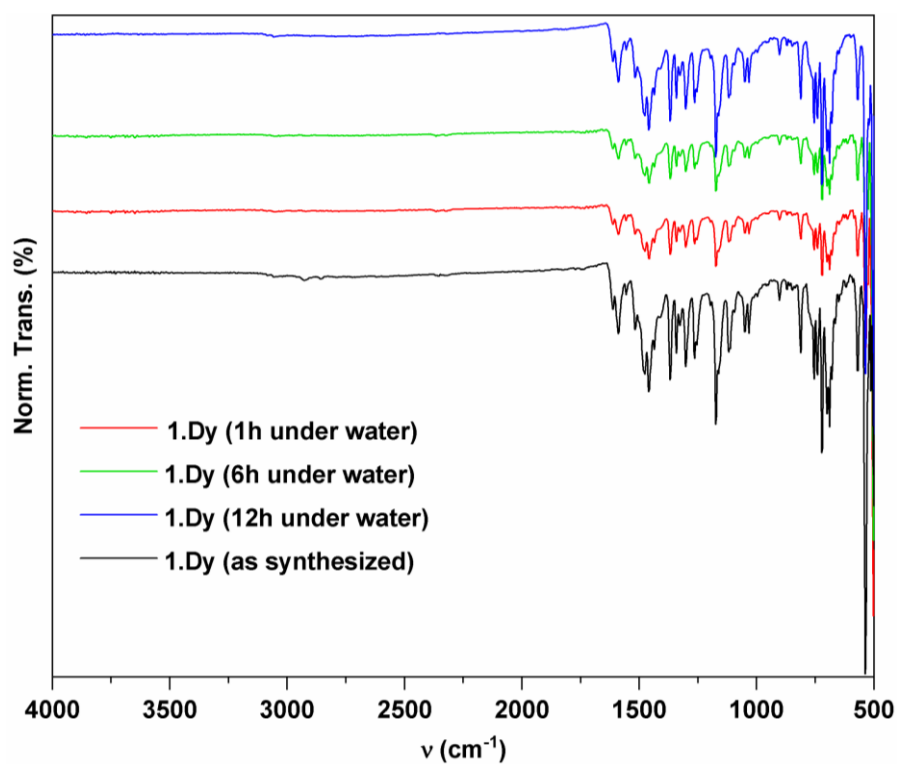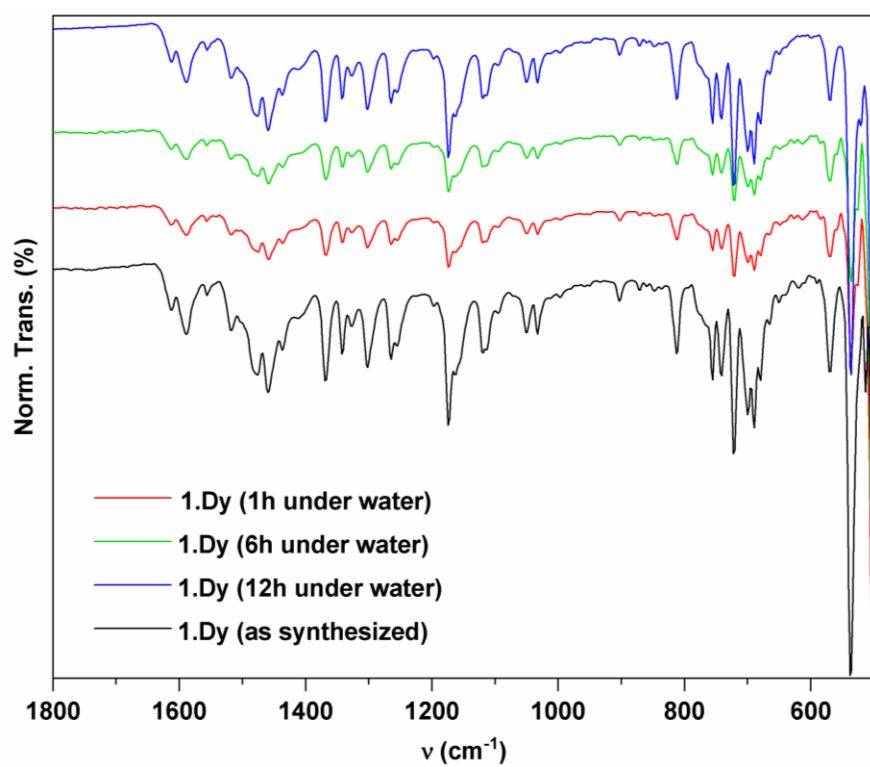

**Figure S7:** The comparative time-dependent solid-state FT-IR spectra (4000 – 400  $\text{cm}^{-1}$  on the top and 1800-400  $\text{cm}^{-1}$  at the bottom) of the complex **1.Dy** recorded at room temperature upon soaking under water instantly 0h (black) and after 1h (red), 6h (green), and 12h (blue).

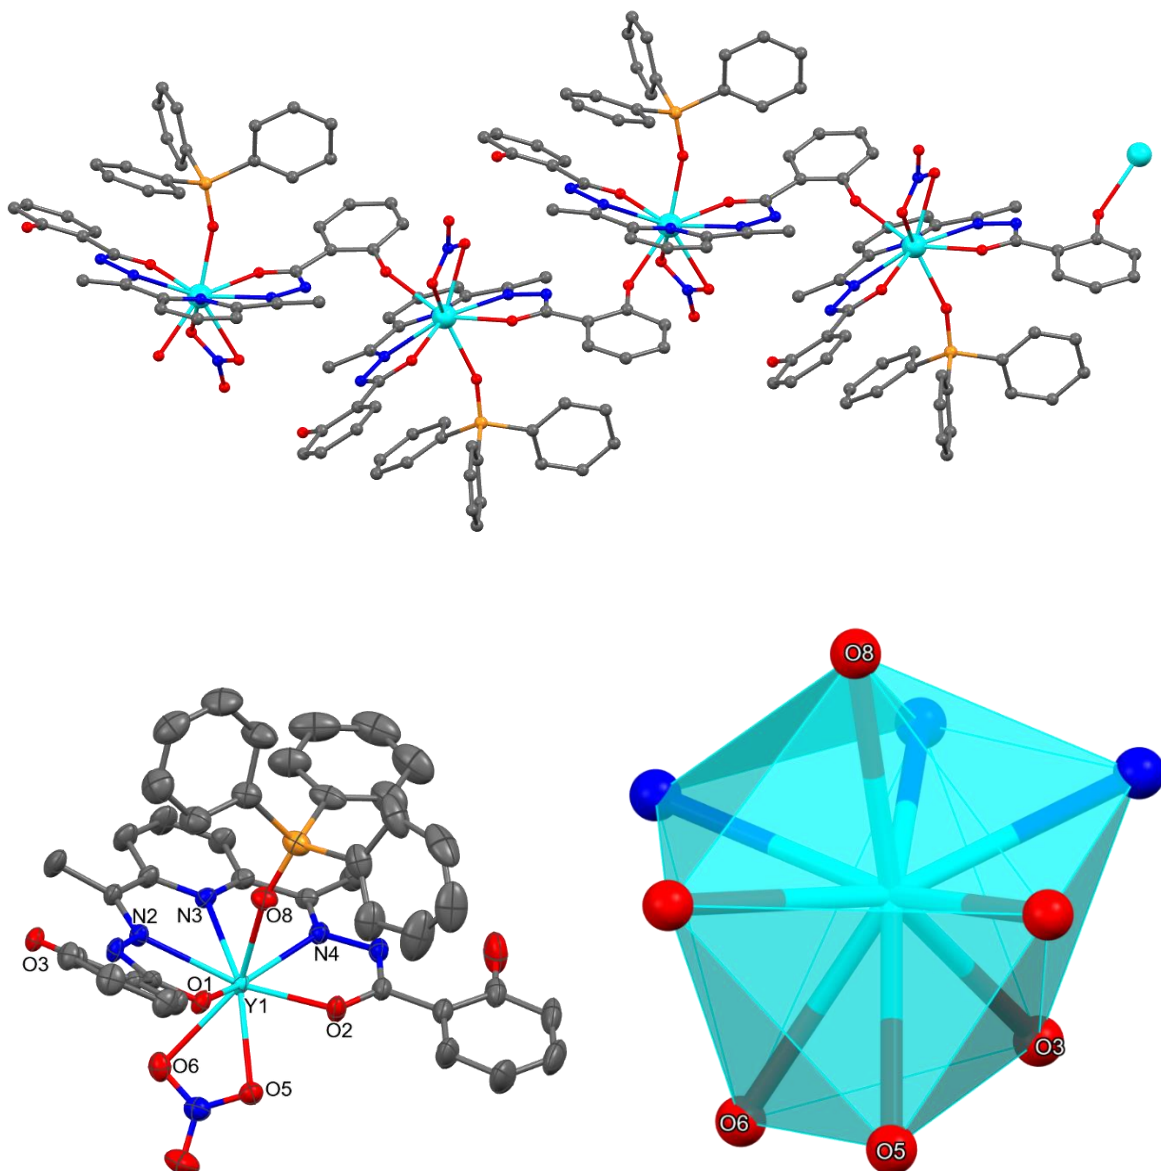

**Figure S8: Top:** The *ball-and-stick* models of the single-crystal X-ray molecular structures of the **1·Y** (displayed up to four consecutive repeat units) **Bottom left:** Ellipsoid models with 40% probability for the single crystal X-ray molecular structure of **1·Y** in solid state. H atoms in **1·Y** are omitted for clarity. Colour codes: cyan, Y; yellow, P; red, O; blue, N; grey, C. **Bottom Right:** The coordination polyhedron around the Y centre of **1·Y**. The oxygen atoms of the meridionally coordinated ancillary ligands are labelled.



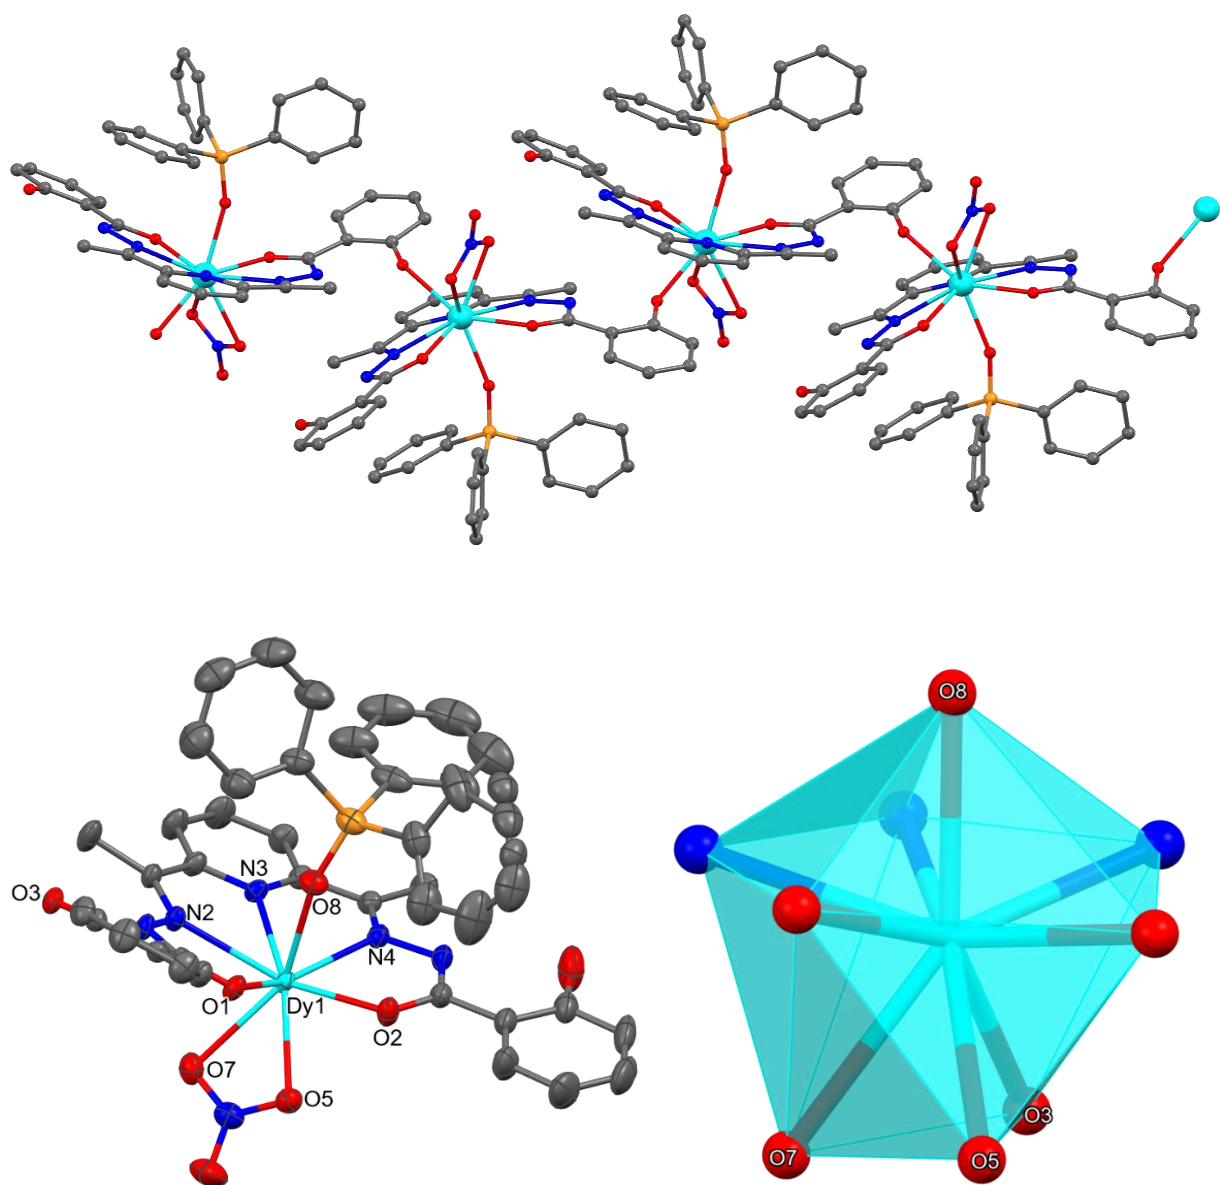

**Figure S9: Top:** The *ball-and-stick* models of the single-crystal X-ray molecular structures of the  $1 \cdot \text{Dy}$  (displayed up to four consecutive repeat units) **Bottom left:** Ellipsoid models with 40% probability for the single crystal X-ray molecular structure of  $1 \cdot \text{Dy}$  in solid state. H atoms in  $1 \cdot \text{Dy}$  are omitted for clarity. Colour codes: cyan, Y; yellow, P; red, O; blue, N; grey, C. **Bottom Right:** The coordination polyhedron around the Dy centre of  $1 \cdot \text{Dy}$ . The oxygen atoms of the meridionally coordinated ancillary ligands are labelled.

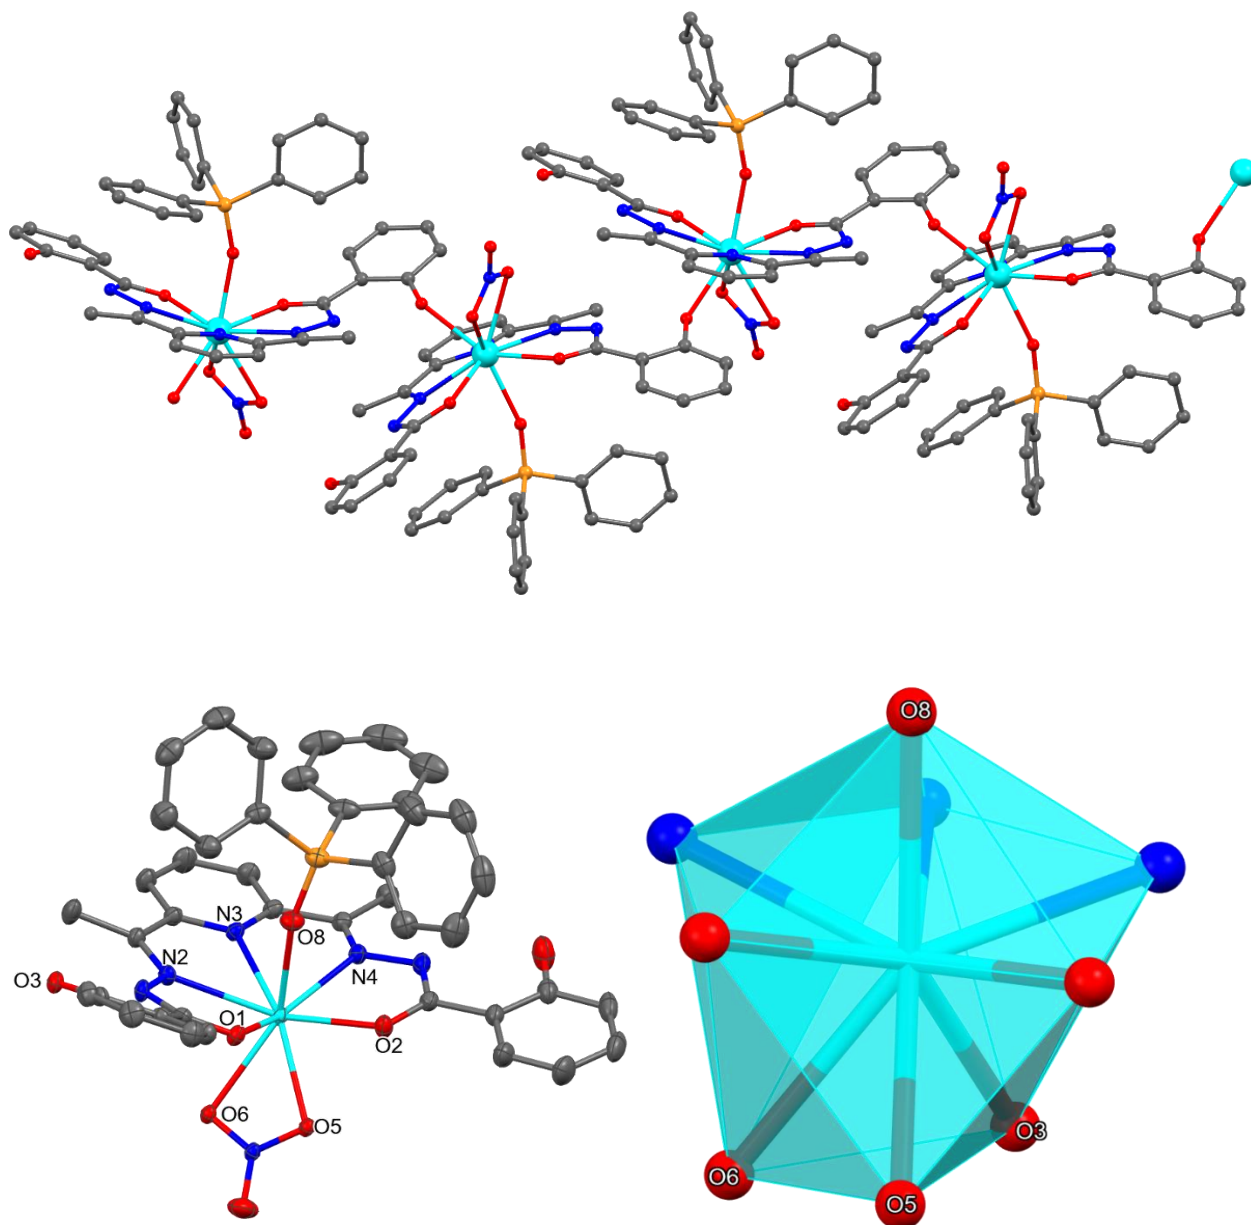

**Figure S10: Top:** The ball-and-stick models of the single-crystal X-ray molecular structures of the  $1 \cdot \text{Gd}$  (displayed up to four consecutive repeat units) **Bottom left:** Ellipsoid models with 50% probability for the single crystal X-ray molecular structure of  $1 \cdot \text{Gd}$  in solid state. H atoms in  $1 \cdot \text{Gd}$  are omitted for clarity. Colour codes: cyan, Gd; yellow, P; red, O; blue, N; grey, C. **Bottom Right:** The coordination polyhedron around the Gd centre of  $1 \cdot \text{Gd}$ . The oxygen atoms of the meridionally coordinated ancillary ligands are labelled.

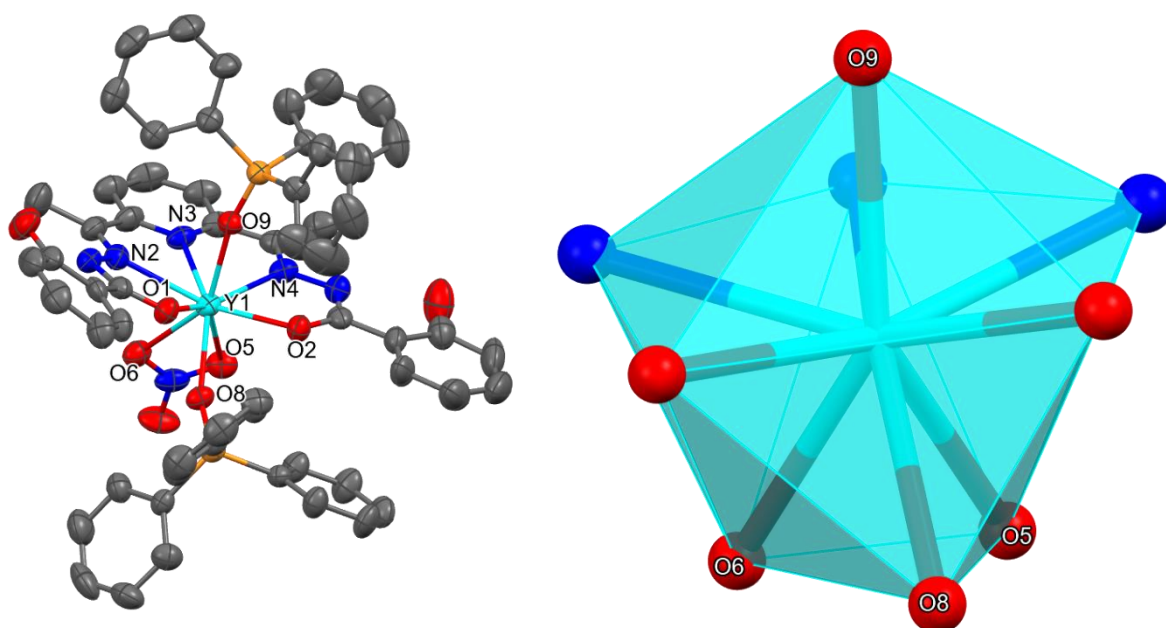

**Figure S11: Top:** Ellipsoid models with 40% probability for the single crystal X-ray molecular structure of  $2 \cdot Y$  in solid state. H atoms in  $2 \cdot Y$  are omitted for clarity. Colour codes: cyan, Y; yellow, P; red, O; blue, N; grey, C. **Bottom:** The coordination polyhedron around the Y centre of  $2 \cdot Y$ . The oxygen atoms of the meridionally coordinated ancillary ligands are labelled.

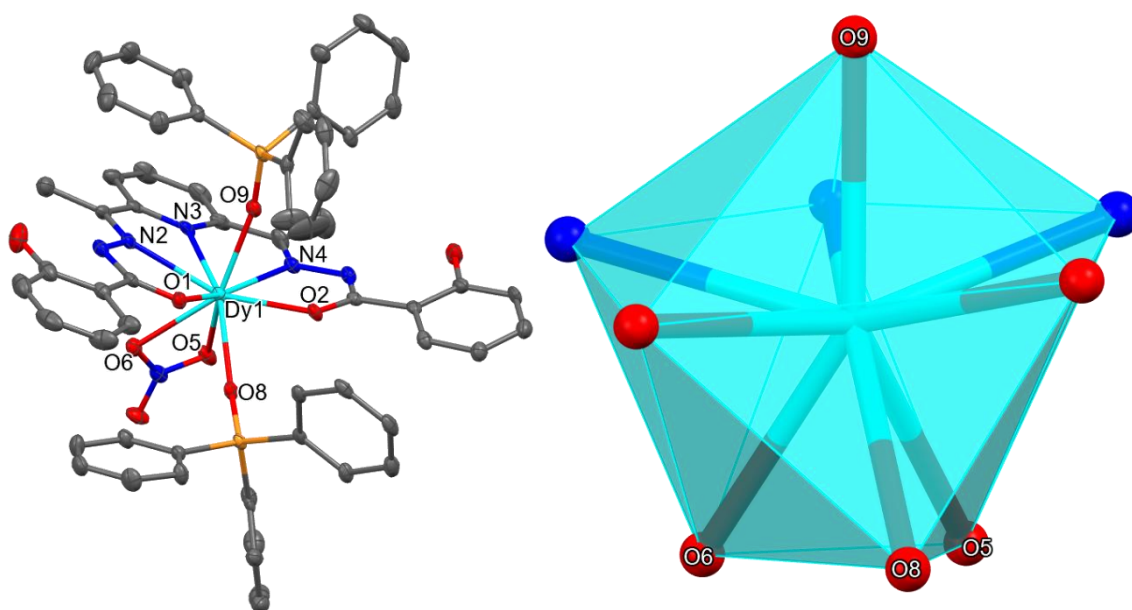

**Figure S12: Top:** Ellipsoid models with 40% probability for the single crystal X-ray molecular structure of  $2 \cdot Dy$  in solid state. H atoms in  $2 \cdot Dy$  are omitted for clarity. Colour codes: cyan, Dy; yellow, P; red, O; blue, N; grey, C. **Bottom:** The coordination polyhedron around the Dy centre of  $2 \cdot Dy$ . The oxygen atoms of the meridionally coordinated ancillary ligands are labelled.

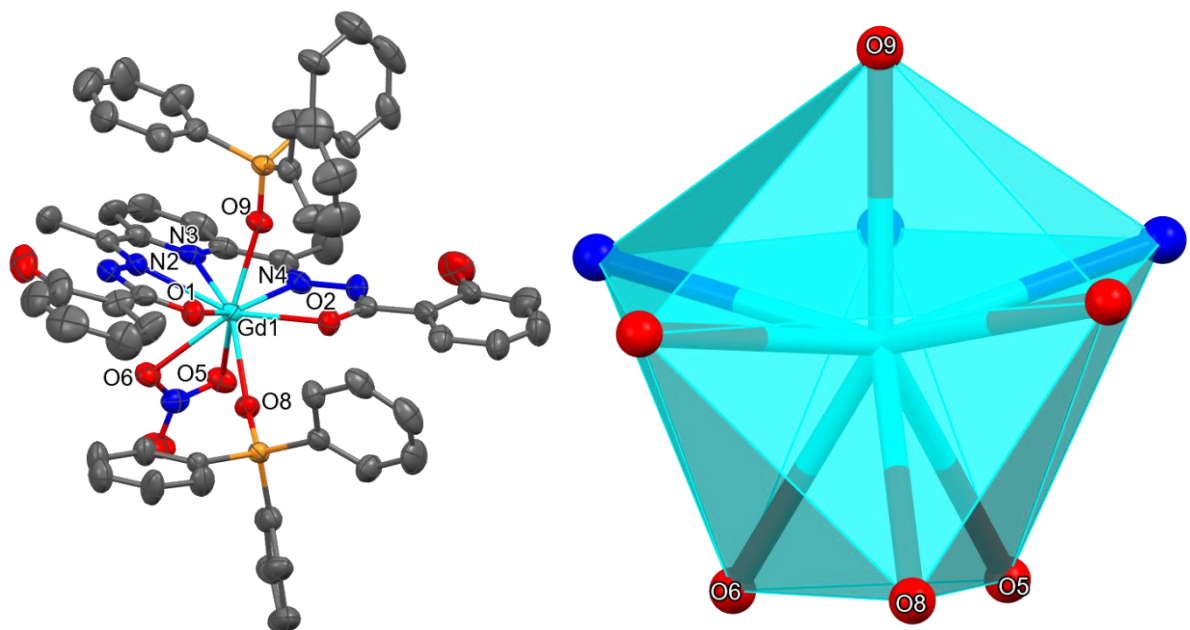

**Figure S13: Top:** Ellipsoid models with 40% probability for the single crystal X-ray molecular structure of **2·Gd** in solid state. H atoms in **2·Gd** are omitted for clarity. Colour codes: cyan, Gd; yellow, P; red, O; blue, N; grey, C. **Bottom:** The coordination polyhedron around the Gd centre of **2·Gd**. The oxygen atoms of the meridionally coordinated ancillary ligands are labelled.

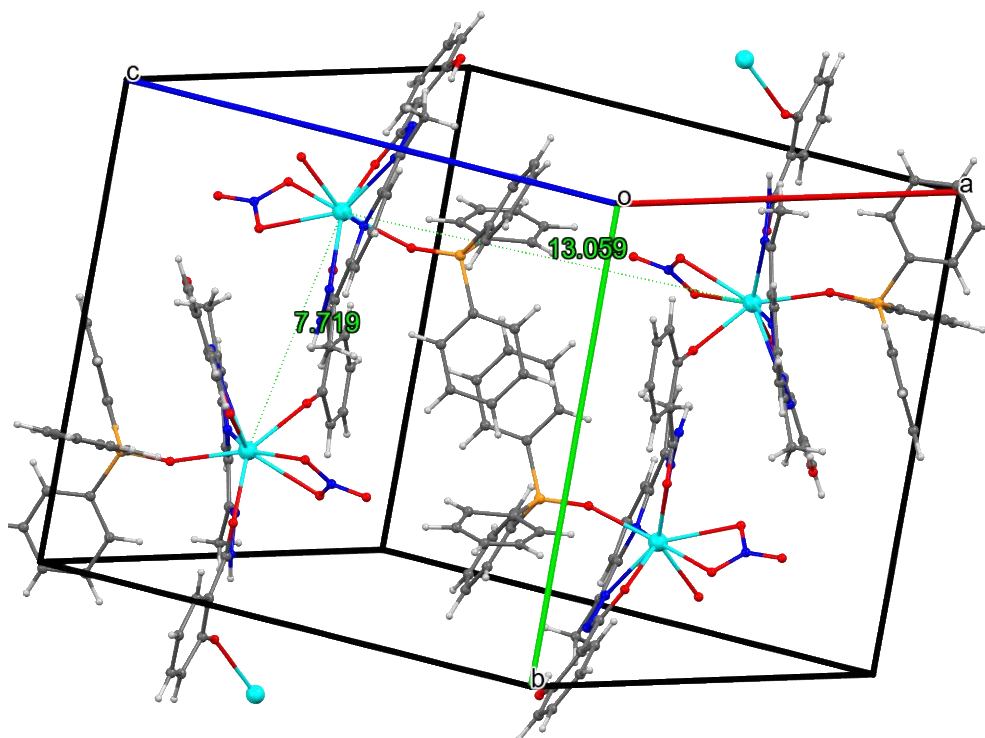

**Figure S14:** Unit cell contents of **1·Y**. Colour codes: cyan, Y; red, O; blue, N; grey, C; off-white, H. The dotted green lines correspond to the Y---Y distances in the unit cells.

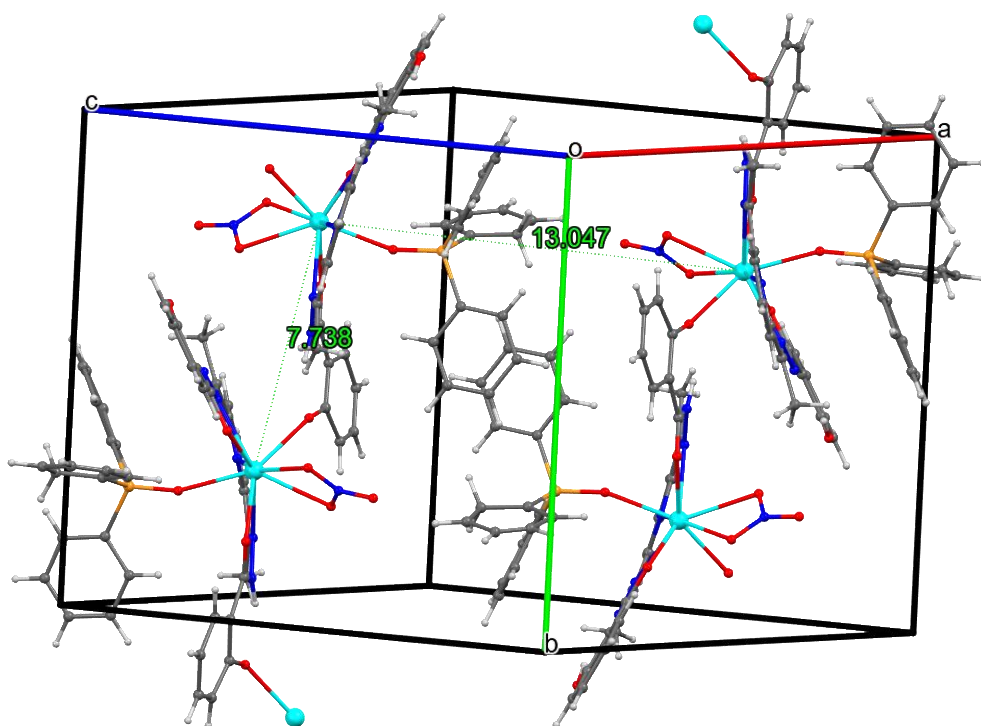

**Figure S15:** Unit cell contents of **1·Dy**. Colour codes: cyan, Dy; red, O; blue, N; grey, C; off-white, H. The dotted green lines correspond to the Dy---Dy distances in the unit cells.

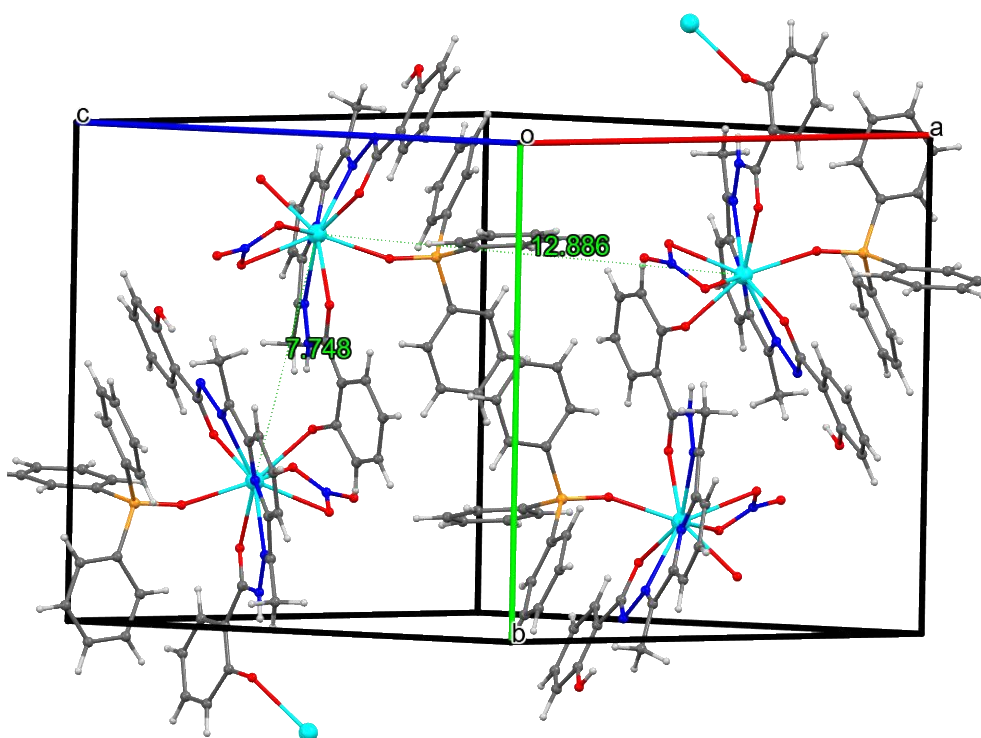

**Figure S16:** Unit cell contents of **1·Gd**. Colour codes: cyan, Gd; red, O; blue, N; grey, C; off-white, H. The dotted green lines correspond to the Gd---Gd distances in the unit cells.



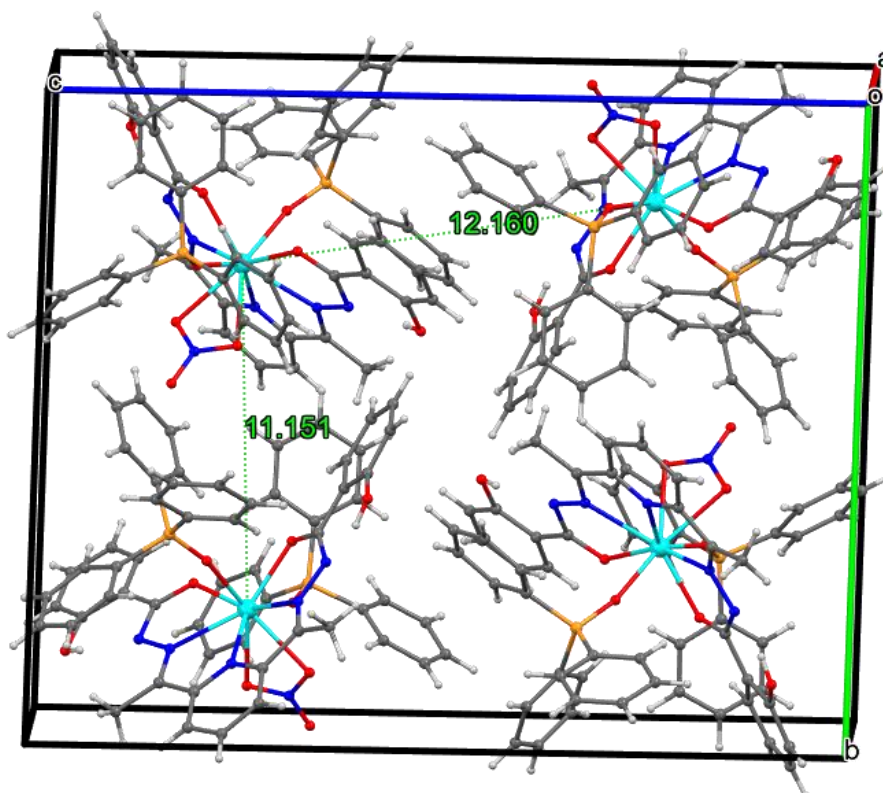

**Figure S17:** Unit cell contents of  $2 \cdot Y$ . Colour codes: cyan, Y; red, O; blue, N; grey, C; off-white, H. The dotted green lines correspond to the Y---Y distances in the unit cells.

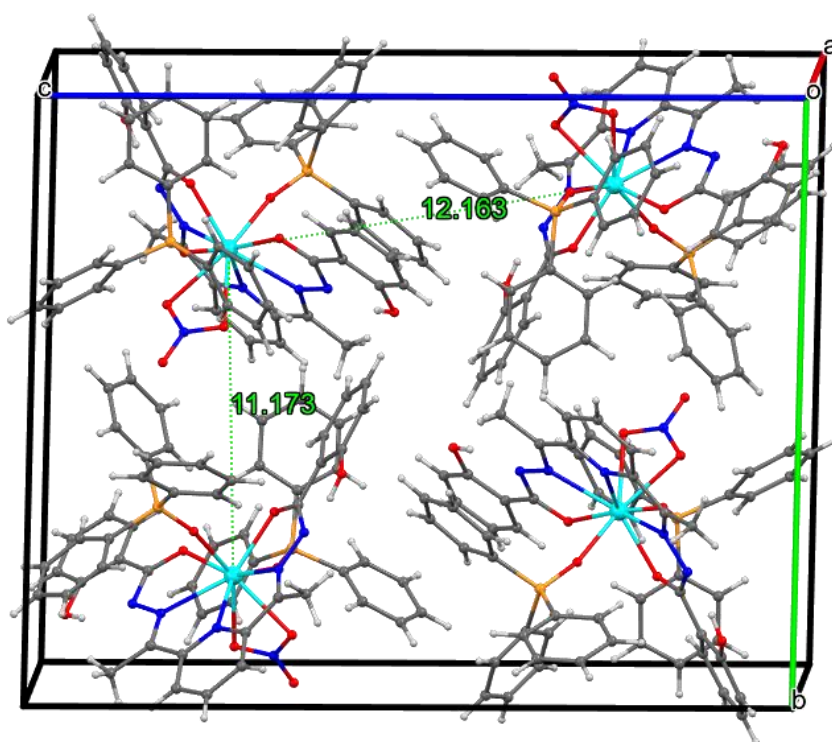

**Figure S18:** Unit cell contents of  $2 \cdot Dy$ . Colour codes: cyan, Dy; red, O; blue, N; grey, C; off-white, H. The dotted green lines correspond to the Dy---Dy distances in the unit cells.

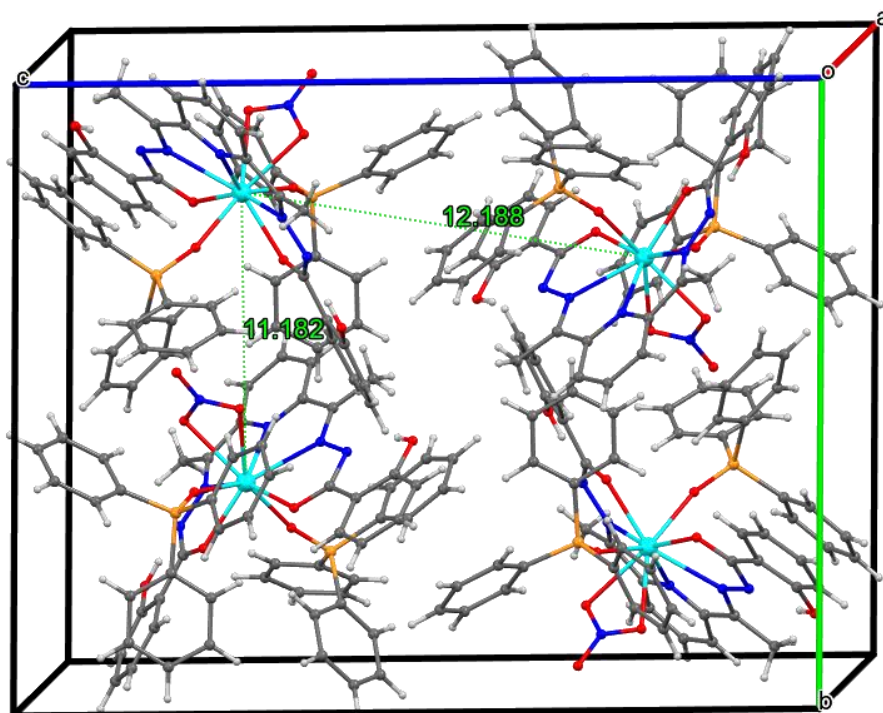

**Figure S19:** Unit cell contents of  $2 \cdot \text{Gd}$ . Colour codes: cyan, Gd; red, O; blue, N; grey, C; off-white, H. The dotted green lines correspond to the Gd---Gd distances in the unit cells.

**Table S2.** Selected crystallographic data and refinement parameters for **1·Ln** and **2·Ln** (Ln = Y, Gd and Dy).

|                                                              | <b>1·Dy</b>                                                                    | <b>1·Y</b>                                                                    | <b>1·Gd</b>                                                                    |
|--------------------------------------------------------------|--------------------------------------------------------------------------------|-------------------------------------------------------------------------------|--------------------------------------------------------------------------------|
| Formula <sup>a</sup>                                         | C <sub>41</sub> H <sub>34</sub> DyN <sub>6</sub> O <sub>8</sub> P              | C <sub>41</sub> H <sub>34</sub> YN <sub>6</sub> O <sub>8</sub> P              | C <sub>41</sub> H <sub>34</sub> GdN <sub>6</sub> O <sub>8</sub> P              |
| Mr (g mol <sup>-1</sup> ) <sup>a</sup>                       | 932.21                                                                         | 858.62                                                                        | 926.96                                                                         |
| crystal system                                               | Monoclinic                                                                     | Monoclinic                                                                    | Monoclinic                                                                     |
| space group                                                  | P 21/n                                                                         | P 21/n                                                                        | P 21/n                                                                         |
| T (K)                                                        | 150                                                                            | 150                                                                           | 150                                                                            |
| <i>a</i> (Å)                                                 | 16.2035(4)                                                                     | 16.1937(4)                                                                    | 16.0840(4)                                                                     |
| <i>b</i> (Å)                                                 | 14.9875(4)                                                                     | 14.9487(3)                                                                    | 14.9967(3)                                                                     |
| <i>c</i> (Å)                                                 | 16.3982(4)                                                                     | 16.4338(4)                                                                    | 16.1977(4)                                                                     |
| $\alpha$ (°)                                                 | 90                                                                             | 90                                                                            | 90                                                                             |
| $\beta$ (°)                                                  | 105.806(2)                                                                     | 105.832(3)                                                                    | 105.453(1)                                                                     |
| $\gamma$ (°)                                                 | 90                                                                             | 90                                                                            | 90                                                                             |
| V (Å <sup>3</sup> )                                          | 3831.73(17)                                                                    | 3827.30(16)                                                                   | 3765.76(15)                                                                    |
| Z                                                            | 4                                                                              | 4                                                                             | 4                                                                              |
| $\rho_{\text{calcd.}}$ (g cm <sup>-3</sup> )                 | 1.616                                                                          | 1.490                                                                         | 1.635                                                                          |
| $\mu$ (mm <sup>-1</sup> )                                    | 2.054                                                                          | 1.628                                                                         | 1.867                                                                          |
| collected reflns                                             | 31126                                                                          | 38058                                                                         | 67528                                                                          |
| unique reflns                                                | 8286                                                                           | 8852                                                                          | 8315                                                                           |
| No. of parameters                                            | 544                                                                            | 546                                                                           | 503                                                                            |
| Refinement                                                   |                                                                                |                                                                               |                                                                                |
| Reflections.                                                 | 31126                                                                          | 38058                                                                         | 67528                                                                          |
| <i>R</i> ( <i>I</i> > 3 $\sigma$ ( <i>I</i> )) <sup>b</sup>  | 0.0228                                                                         | 0.0383                                                                        | 0.0236                                                                         |
| <i>wR</i> ( <i>I</i> > 3 $\sigma$ ( <i>I</i> )) <sup>c</sup> | 0.0573                                                                         | 0.0895                                                                        | 0.0576                                                                         |
| GOF on <i>F</i>                                              | 1.031                                                                          | 1.020                                                                         | 1.046                                                                          |
|                                                              | <b>2·Dy</b>                                                                    | <b>2·Y</b>                                                                    | <b>2·Gd</b>                                                                    |
| Formula <sup>a</sup>                                         | C <sub>59</sub> H <sub>49</sub> DyN <sub>6</sub> O <sub>9</sub> P <sub>2</sub> | C <sub>59</sub> H <sub>49</sub> YN <sub>6</sub> O <sub>9</sub> P <sub>2</sub> | C <sub>59</sub> H <sub>49</sub> GdN <sub>6</sub> O <sub>9</sub> P <sub>2</sub> |
| Mr (g mol <sup>-1</sup> ) <sup>a</sup>                       | 1210.48                                                                        | 1136.89                                                                       | 1205.23                                                                        |
| crystal system                                               | Monoclinic                                                                     | Monoclinic                                                                    | Monoclinic                                                                     |
| space group                                                  | P 21/c                                                                         | P 21/c                                                                        | P 21/c                                                                         |
| T (K)                                                        | 100                                                                            | 100                                                                           | 100                                                                            |
| <i>a</i> (Å)                                                 | 12.7507(4)                                                                     | 12.7183(8)                                                                    | 12.7779(4)                                                                     |
| <i>b</i> (Å)                                                 | 18.8420(6)                                                                     | 18.8005(11)                                                                   | 18.8824(5)                                                                     |
| <i>c</i> (Å)                                                 | 23.9856(9)                                                                     | 23.9922(15)                                                                   | 24.0303(6)                                                                     |
| $\alpha$ (°)                                                 | 90                                                                             | 90                                                                            | 90                                                                             |
| $\beta$ (°)                                                  | 103.0270(10)                                                                   | 102.962(2)                                                                    | 103.1190(10)                                                                   |
| $\gamma$ (°)                                                 | 90                                                                             | 90                                                                            | 90                                                                             |
| V (Å <sup>3</sup> )                                          | 5614.2(3)                                                                      | 5590.6(6)                                                                     | 5646.6(3)                                                                      |
| Z                                                            | 4                                                                              | 4                                                                             | 4                                                                              |
| $\rho_{\text{calcd.}}$ (g cm <sup>-3</sup> )                 | 1.432                                                                          | 1.351                                                                         | 1.418                                                                          |
| $\mu$ (mm <sup>-1</sup> )                                    | 1.449                                                                          | 1.162                                                                         | 1.292                                                                          |
| collected reflns                                             | 104895                                                                         | 53310                                                                         | 74873                                                                          |
| unique reflns                                                | 12889                                                                          | 9913                                                                          | 13985                                                                          |
| No. of parameters                                            | 698                                                                            | 699                                                                           | 675                                                                            |
| Refinement                                                   |                                                                                |                                                                               |                                                                                |
| Reflections.                                                 | 104895                                                                         | 53310                                                                         | 37008                                                                          |
| <i>R</i> ( <i>I</i> > 3 $\sigma$ ( <i>I</i> )) <sup>b</sup>  | 0.0202                                                                         | 0.0644                                                                        | 0.0375                                                                         |
| <i>wR</i> ( <i>I</i> > 3 $\sigma$ ( <i>I</i> )) <sup>c</sup> | 0.0534                                                                         | 0.1838                                                                        | 0.1043                                                                         |
| GOF on <i>F</i>                                              | 1.032                                                                          | 0.956                                                                         | 0.996                                                                          |

<sup>a</sup> Excluding co-crystallized solvent molecules. <sup>b</sup>  $R = \sum ||F_o| - |F_c|| / \sum |F_o|$ , <sup>c</sup>  $wR = [\sum (w(F_o^2 - F_c^2)^2) / \sum (w(F_o^2)^2)]^{1/2}$  where  $w = 1 / (\sigma^2(F_o^2) + (aP)^2 + bP)$  with  $P = (2F_c^2 + \max(F_o^2, 0)) / 3$ .



**Table S3.** Selected bond lengths (Å) and bond angles (°) of the complexes **1·Ln** (Ln = Y, Dy, Gd) and **2·Ln** (Ln = Y, Dy, Gd)

Complex **1·Y**

|       |            |       |            |       |            |       |            |
|-------|------------|-------|------------|-------|------------|-------|------------|
| Y1 O3 | 2.3560(14) | Y1 O1 | 2.3912(14) | Y1 O2 | 2.2629(15) | Y1 O6 | 2.5417(17) |
| Y1 O5 | 2.4307(15) | Y1 N4 | 2.4717(18) | Y1 O8 | 2.3573(16) | Y1 N2 | 2.5352(17) |
| Y1 N3 | 2.5120(16) | Y1 N6 | 2.903(2)   |       |            |       |            |

|          |           |          |           |          |           |
|----------|-----------|----------|-----------|----------|-----------|
| O3 Y1 O1 | 141.58(5) | O3 Y1 O6 | 70.53(5)  | O3 Y1 O5 | 73.31(5)  |
| O3 Y1 N4 | 71.09(6)  | O3 Y1 O8 | 145.47(5) | O3 Y1 N2 | 112.55(5) |
| O3 Y1 N3 | 77.81(5)  | O3 Y1 N6 | 69.27(6)  | O1 Y1 O6 | 72.28(5)  |
| O1 Y1 O5 | 76.19(5)  | O1 Y1 N4 | 145.40(6) | O1 Y1 N2 | 64.07(5)  |
| O1 Y1 N3 | 122.99(5) | O1 Y1 N6 | 73.12(6)  | O2 Y1 O3 | 95.83(6)  |
| O2 Y1 O1 | 94.44(5)  | O2 Y1 O6 | 120.08(6) | O2 Y1 O5 | 68.90(6)  |
| O2 Y1 N4 | 64.79(6)  | O2 Y1 O8 | 81.03(6)  | O2 Y1 N2 | 151.61(6) |
| O2 Y1 N3 | 127.04(6) | O2 Y1 N6 | 94.24(6)  | O6 Y1 N6 | 25.87(6)  |
| O5 Y1 O6 | 51.19(5)  | O5 Y1 N4 | 116.65(6) | O5 Y1 N2 | 118.97(5) |
| O5 Y1 N3 | 148.55(6) | O5 Y1 N6 | 25.34(6)  | N4 Y1 O6 | 141.61(6) |
| N4 Y1 N2 | 122.55(6) | N4 Y1 N3 | 63.48(6)  | N4 Y1 N6 | 132.44(6) |
| O8 Y1 O1 | 72.78(5)  | O8 Y1 O6 | 140.20(6) | O8 Y1 O5 | 134.40(6) |
| O8 Y1 N4 | 76.65(6)  | O8 Y1 N2 | 75.10(6)  | O8 Y1 N3 | 77.05(6)  |
| O8 Y1 N6 | 145.05(6) | N2 Y1 O6 | 72.91(6)  | N2 Y1 N6 | 96.56(6)  |
| N3 Y1 O6 | 107.22(6) | N3 Y1 N2 | 61.98(5)  | N3 Y1 N6 | 129.45(6) |

Complex **1·Gd**

|        |            |        |            |        |            |        |            |
|--------|------------|--------|------------|--------|------------|--------|------------|
| Gd1 O1 | 2.4232(15) | Gd1 O3 | 2.3858(15) | Gd1 O8 | 2.3876(16) | Gd1 O6 | 2.5670(15) |
| Gd1 O5 | 2.4601(14) | Gd1 O2 | 2.2994(15) | Gd1 N3 | 2.5325(18) | Gd1 N4 | 2.4991(18) |
| Gd1 N6 | 2.9379(18) | Gd1 N2 | 2.5623(18) |        |            |        |            |

|           |           |           |           |           |           |
|-----------|-----------|-----------|-----------|-----------|-----------|
| O1 Gd1 O6 | 71.78(5)  | O1 Gd1 O5 | 76.71(5)  | O1 Gd1 N3 | 122.08(5) |
| O1 Gd1 N4 | 145.75(6) | O1 Gd1 N6 | 71.87(5)  | O1 Gd1 N2 | 63.50(5)  |
| O3 Gd1 O1 | 141.72(5) | O3 Gd1 O8 | 145.10(6) | O3 Gd1 O6 | 70.58(5)  |
| O3 Gd1 O5 | 74.48(5)  | O3 Gd1 N3 | 77.42(6)  | O3 Gd1 N4 | 71.16(6)  |
| O3 Gd1 N6 | 71.27(5)  | O3 Gd1 N2 | 112.12(6) | O8 Gd1 O1 | 72.79(6)  |
| O8 Gd1 O6 | 140.63(5) | O8 Gd1 O5 | 133.59(5) | O8 Gd1 N3 | 76.50(6)  |
| O8 Gd1 N4 | 76.54(6)  | O8 Gd1 N6 | 143.41(5) | O8 Gd1 N2 | 74.32(6)  |
| O6 Gd1 N6 | 25.71(5)  | O5 Gd1 O6 | 50.97(5)  | O5 Gd1 N3 | 149.88(5) |
| O5 Gd1 N4 | 116.11(5) | O5 Gd1 N6 | 25.27(5)  | O5 Gd1 N2 | 120.69(5) |
| O2 Gd1 O1 | 95.55(5)  | O2 Gd1 O3 | 96.94(6)  | O2 Gd1 O8 | 80.24(6)  |
| O2 Gd1 O6 | 119.70(5) | O2 Gd1 O5 | 68.74(5)  | O2 Gd1 N3 | 125.90(6) |
| O2 Gd1 N4 | 64.17(6)  | O2 Gd1 N6 | 93.99(5)  | O2 Gd1 N2 | 150.79(6) |
| N3 Gd1 O6 | 108.97(5) | N3 Gd1 N6 | 131.79(5) | N3 Gd1 N2 | 61.47(6)  |
| N4 Gd1 O6 | 141.72(5) | N4 Gd1 N3 | 63.19(6)  | N4 Gd1 N6 | 133.17(5) |
| N4 Gd1 N2 | 121.69(6) | N2 Gd1 O6 | 74.93(5)  | N2 Gd1 N6 | 97.88(5)  |

### Complex 1•Dy

Dy1 O1 2.4062(15) Dy1 O3 2.3718(15) Dy1 O8 2.3704(17) Dy1 O5 2.4413(17)  
Dy1 O2 2.2757(16) Dy1 O7 2.5515(18) Dy1 N3 2.5154(18) Dy1 N2 2.5409(18)  
Dy1 N4 2.4770(19) Dy1 N6 2.912(2)

O1 Dy1 O5 76.43(6) O1 Dy1 O7 72.18(6) O1 Dy1 N3 122.69(5)  
O1 Dy1 N2 63.87(6) O1 Dy1 N4 145.42(6) O1 Dy1 N6 73.08(6)  
O3 Dy1 O1 141.62(5) O3 Dy1 O5 73.28(6) O3 Dy1 O7 70.56(5)  
O3 Dy1 N3 77.97(6) O3 Dy1 N2 112.68(6) O3 Dy1 N4 71.12(6)  
O3 Dy1 N6 69.40(6) O8 Dy1 O1 72.68(6) O8 Dy1 O3 145.52(6)  
O8 Dy1 O5 134.27(6) O8 Dy1 O7 140.30(6) O8 Dy1 N3 76.96(6)  
O8 Dy1 N2 74.96(6) O8 Dy1 N4 76.63(6) O8 Dy1 N6 144.86(6)  
O5 Dy1 O7 50.98(6) O5 Dy1 N3 148.77(6) O5 Dy1 N2 119.30(6)  
O5 Dy1 N4 116.54(6) O5 Dy1 N6 25.40(6) O2 Dy1 O1 94.76(6)  
O2 Dy1 O3 95.80(6) O2 Dy1 O8 80.87(7) O2 Dy1 O5 68.91(6)  
O2 Dy1 O7 119.88(6) O2 Dy1 N3 126.79(6) O2 Dy1 N2 151.49(6)  
O2 Dy1 N4 64.62(6) O2 Dy1 N6 94.31(6) O7 Dy1 N6 25.60(6)  
N3 Dy1 O7 107.70(6) N3 Dy1 N2 61.87(6) N3 Dy1 N6 129.75(6)  
N2 Dy1 O7 73.41(6) N2 Dy1 N6 96.79(6) N4 Dy1 O7 141.68(6)  
N4 Dy1 N3 63.44(6) N4 Dy1 N2 122.38(6) N4 Dy1 N6 132.53(6)

### Complex 2•Y

Y1 O9 2.291(3) Y1 O1 2.325(3) Y1 O2 2.335(4) Y1 O8 2.319(3)  
Y1 O6 2.544(3) Y1 O5 2.493(3) Y1 N2 2.498(4) Y1 N3 2.506(4)  
Y1 N4 2.495(4) Y1 N6 2.919(4)

O9 Y1 O1 75.22(11) O9 Y1 O2 83.73(12) O9 Y1 O8 138.12(11)  
O9 Y1 O6 143.00(12) O9 Y1 O5 145.07(11) O9 Y1 N2 75.24(13)  
O9 Y1 N3 79.25(12) O9 Y1 N4 79.06(12) O9 Y1 N6 157.81(12)  
O1 Y1 O2 97.56(12) O1 Y1 O6 102.37(11) O1 Y1 O5 139.54(11)  
O1 Y1 N2 64.26(13) O1 Y1 N3 125.35(13) O1 Y1 N4 150.09(12)  
O1 Y1 N6 120.02(12) O2 Y1 O6 132.48(12) O2 Y1 O5 87.03(12)  
O2 Y1 N2 154.96(13) O2 Y1 N3 126.66(12) O2 Y1 N4 64.38(12)  
O2 Y1 N6 108.17(13) O8 Y1 O1 70.60(11) O8 Y1 O2 77.63(12)  
O8 Y1 O6 69.36(11) O8 Y1 O5 71.26(11) O8 Y1 N2 109.39(13)  
O8 Y1 N3 141.13(12) O8 Y1 N4 123.38(13) O8 Y1 N6 63.93(11)  
O6 Y1 N6 25.92(12) O5 Y1 O6 50.81(12) O5 Y1 N2 118.01(12)  
O5 Y1 N3 79.58(12) O5 Y1 N4 66.61(12) O5 Y1 N6 25.53(12)  
N2 Y1 O6 70.91(12) N2 Y1 N3 62.83(13) N2 Y1 N6 96.23(13)  
N3 Y1 O6 72.38(12) N3 Y1 N6 78.65(12) N4 Y1 O6 107.35(12)  
N4 Y1 N2 123.01(14) N4 Y1 N3 62.89(14) N4 Y1 N6 89.16(13)

### Complex 2•Gd

Gd1 O8 2.358(2) Gd1 O5 2.542(2) Gd1 O9 2.336(2) Gd1 O2 2.377(2)  
Gd1 O6 2.584(2) Gd1 O1 2.360(2) Gd1 N6 2.959(3) Gd1 N3 2.550(3)  
Gd1 N2 2.534(3) Gd1 N4 2.537(3)

|           |           |           |           |           |           |
|-----------|-----------|-----------|-----------|-----------|-----------|
| O8 Gd1 O5 | 71.20(7)  | O8 Gd1 O2 | 78.58(8)  | O8 Gd1 O6 | 69.53(7)  |
| O8 Gd1 O1 | 70.58(7)  | O8 Gd1 N6 | 64.14(7)  | O8 Gd1 N3 | 141.69(8) |
| O8 Gd1 N2 | 110.08(8) | O8 Gd1 N4 | 123.68(8) | O5 Gd1 O6 | 49.97(7)  |
| O5 Gd1 N6 | 25.17(7)  | O5 Gd1 N3 | 80.08(8)  | O9 Gd1 O8 | 137.41(7) |
| O9 Gd1 O5 | 146.09(7) | O9 Gd1 O2 | 83.53(8)  | O9 Gd1 O6 | 143.25(8) |
| O9 Gd1 O1 | 74.90(8)  | O9 Gd1 N6 | 158.23(8) | O9 Gd1 N3 | 79.23(8)  |
| O9 Gd1 N2 | 74.39(8)  | O9 Gd1 N4 | 79.74(8)  | O2 Gd1 O5 | 86.93(8)  |
| O2 Gd1 O6 | 132.27(8) | O2 Gd1 N6 | 108.15(8) | O2 Gd1 N3 | 125.39(8) |
| O2 Gd1 N2 | 155.01(8) | O2 Gd1 N4 | 63.54(8)  | O6 Gd1 N6 | 25.42(7)  |
| O1 Gd1 O5 | 138.93(7) | O1 Gd1 O2 | 99.73(8)  | O1 Gd1 O6 | 101.89(7) |
| O1 Gd1 N6 | 119.37(8) | O1 Gd1 N3 | 124.23(8) | O1 Gd1 N2 | 63.60(8)  |
| O1 Gd1 N4 | 151.16(8) | N3 Gd1 O6 | 72.66(8)  | N3 Gd1 N6 | 79.04(8)  |
| N2 Gd1 O5 | 117.97(8) | N2 Gd1 O6 | 71.76(8)  | N2 Gd1 N6 | 96.56(8)  |
| N2 Gd1 N3 | 62.17(9)  | N2 Gd1 N4 | 122.05(9) | N4 Gd1 O5 | 66.91(8)  |
| N4 Gd1 O6 | 106.65(8) | N4 Gd1 N6 | 88.99(8)  | N4 Gd1 N3 | 62.55(9)  |

### Complex 2•Dy

|        |            |        |            |        |            |        |            |
|--------|------------|--------|------------|--------|------------|--------|------------|
| Dy1 O9 | 2.3032(11) | Dy1 O8 | 2.3334(11) | Dy1 O1 | 2.3338(11) | Dy1 O6 | 2.5684(12) |
| Dy1 O2 | 2.3493(12) | Dy1 O5 | 2.5115(12) | Dy1 N4 | 2.5085(14) | Dy1 N2 | 2.5066(14) |
| Dy1 N6 | 2.9353(14) | Dy1 N3 | 2.5212(14) |        |            |        |            |

|           |           |           |           |           |           |
|-----------|-----------|-----------|-----------|-----------|-----------|
| O9 Dy1 O8 | 138.02(4) | O9 Dy1 O1 | 75.07(4)  | O9 Dy1 O6 | 143.07(4) |
| O9 Dy1 O2 | 83.78(4)  | O9 Dy1 O5 | 145.38(4) | O9 Dy1 N4 | 79.43(4)  |
| O9 Dy1 N2 | 74.70(4)  | O9 Dy1 N6 | 157.84(4) | O9 Dy1 N3 | 79.10(4)  |
| O8 Dy1 O1 | 70.69(4)  | O8 Dy1 O6 | 69.29(4)  | O8 Dy1 O2 | 77.95(4)  |
| O8 Dy1 O5 | 71.26(4)  | O8 Dy1 N4 | 123.26(4) | O8 Dy1 N2 | 109.71(4) |
| O8 Dy1 N6 | 63.96(4)  | O8 Dy1 N3 | 141.34(4) | O1 Dy1 O6 | 102.29(4) |
| O1 Dy1 O2 | 98.27(4)  | O1 Dy1 O5 | 139.43(4) | O1 Dy1 N4 | 150.44(4) |
| O1 Dy1 N2 | 63.96(4)  | O1 Dy1 N6 | 119.84(4) | O1 Dy1 N3 | 125.04(4) |
| O6 Dy1 N6 | 25.61(4)  | O2 Dy1 O6 | 132.30(4) | O2 Dy1 O5 | 87.07(4)  |
| O2 Dy1 N4 | 63.96(4)  | O2 Dy1 N2 | 154.84(4) | O2 Dy1 N6 | 108.20(4) |
| O2 Dy1 N3 | 126.12(4) | O5 Dy1 O6 | 50.39(4)  | O5 Dy1 N6 | 25.41(4)  |
| O5 Dy1 N3 | 79.64(4)  | N4 Dy1 O6 | 107.08(4) | N4 Dy1 O5 | 66.58(4)  |
| N4 Dy1 N6 | 89.05(4)  | N4 Dy1 N3 | 62.82(5)  | N2 Dy1 O6 | 71.46(4)  |
| N2 Dy1 O5 | 118.07(4) | N2 Dy1 N4 | 122.87(5) | N2 Dy1 N6 | 96.45(4)  |
| N2 Dy1 N3 | 62.75(5)  | N3 Dy1 O6 | 72.63(4)  | N3 Dy1 N6 | 78.80(4)  |

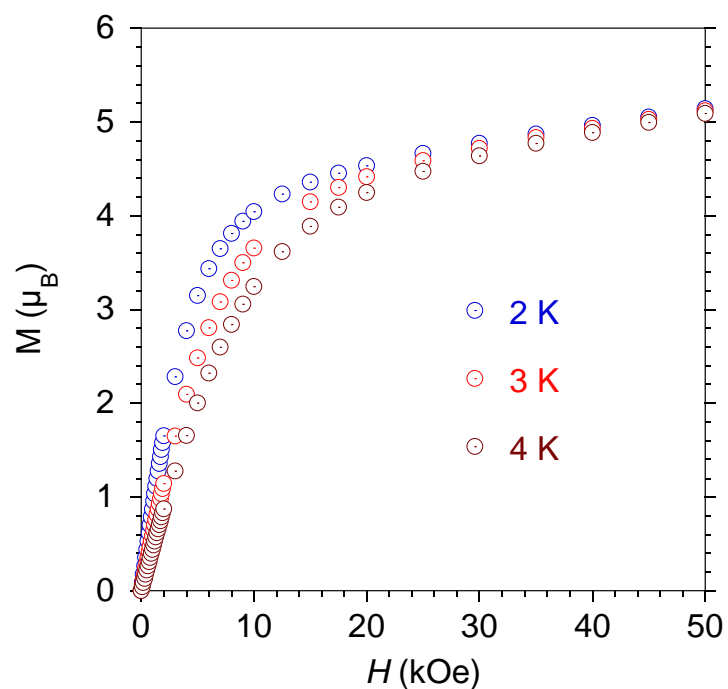

**Figures S20:** The variable temperature (2K, blue circles; 3K, red circles; 4K, purple) field dependence of the magnetization measured on the polycrystalline solid sample of **1.Dy**.

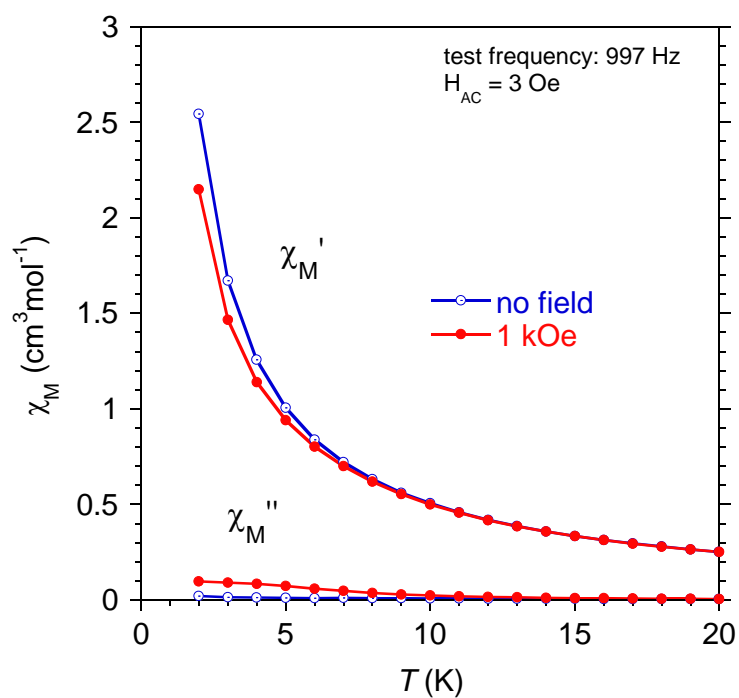

**Figure S21:** The AC susceptibility for **1.Dy** recorded without and with an applied DC field.

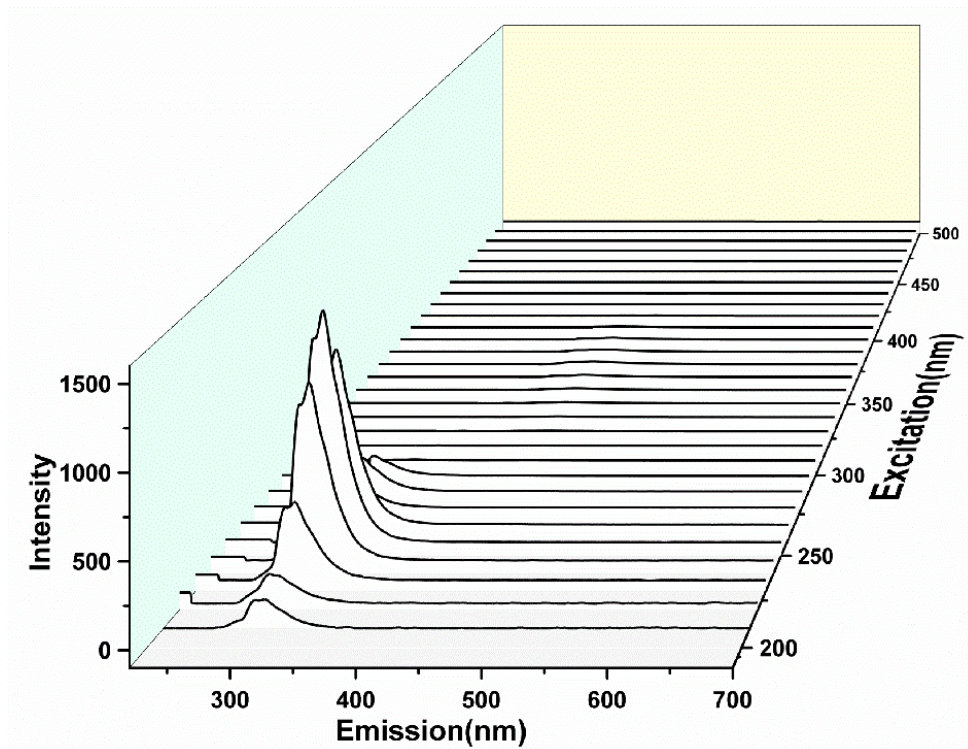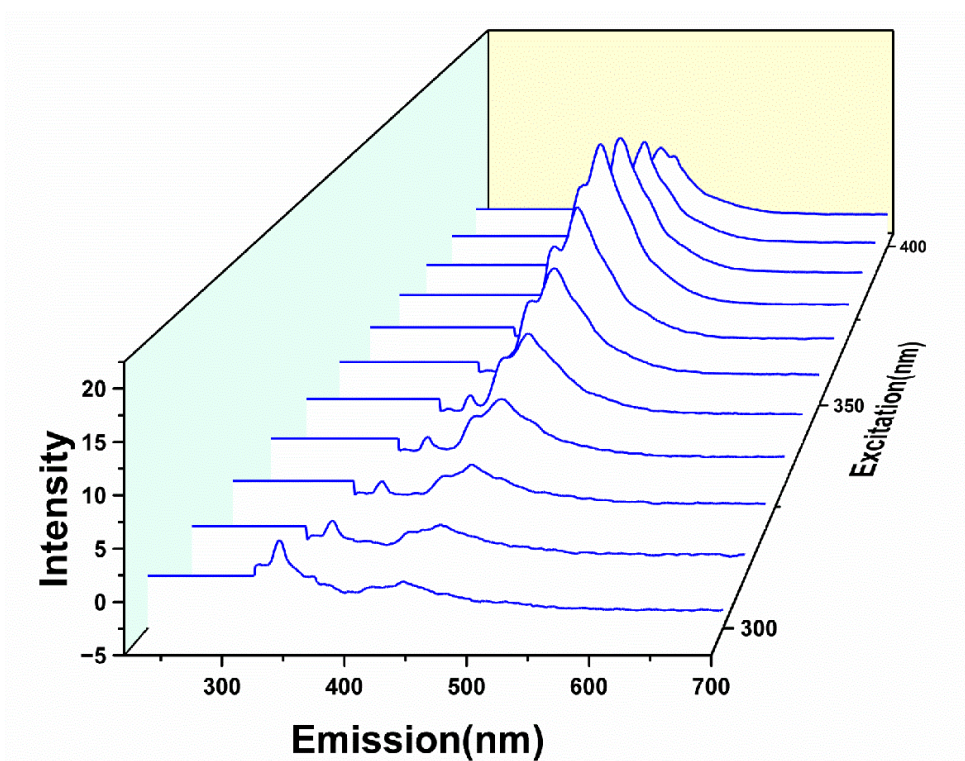

**Figure S22:** The excitation PL spectra for the 12.5 μM methanolic solution of **1·Dy** ranging from 200 nm to 500 nm (top) and the zoomed-in plot covering 300-400 nm (bottom) (Excitation and emission bandwidth = 2.5 nm).



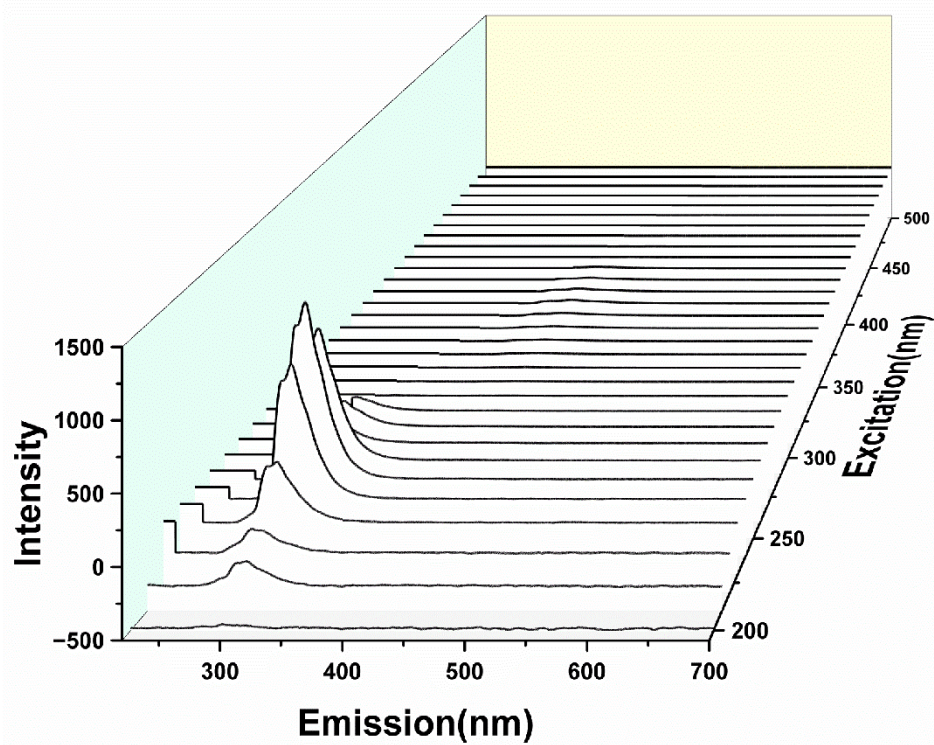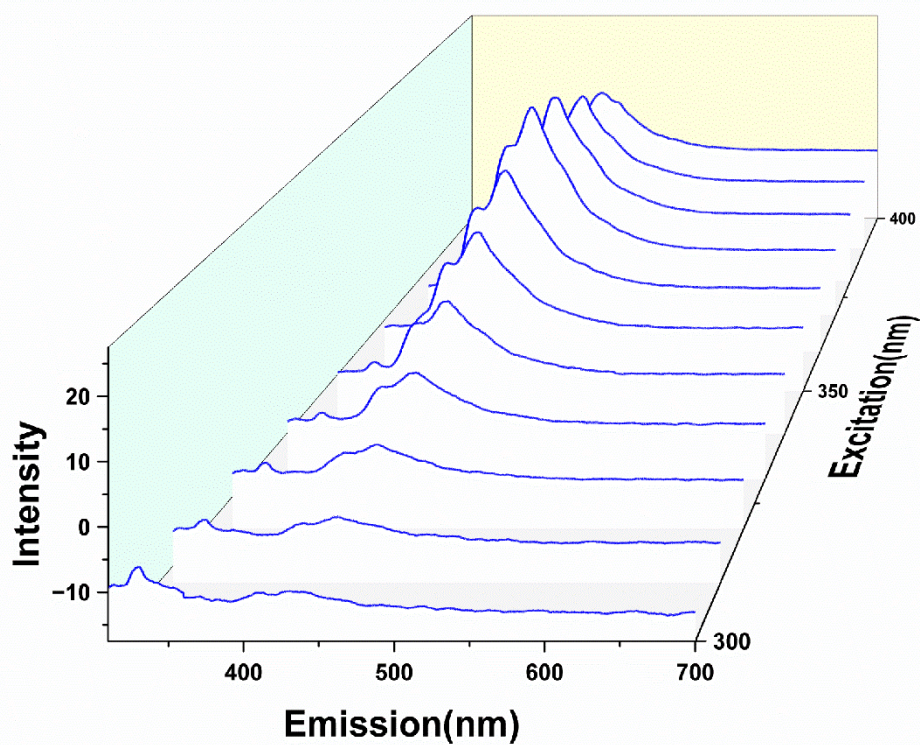

**Figure S23:** The excitation PL spectra for the 2mL of 12.5  $\mu$ M methanolic solution of **1-Dy** in the presence of 5 equivalents (w.r.t. Dy ion) of  $\text{NH}_4\text{F}$  in the range of 200 nm to 500 nm (top) and its zoomed-in plot covering 300-400 nm (bottom) (Excitation and emission bandwidth = 2.5 nm).

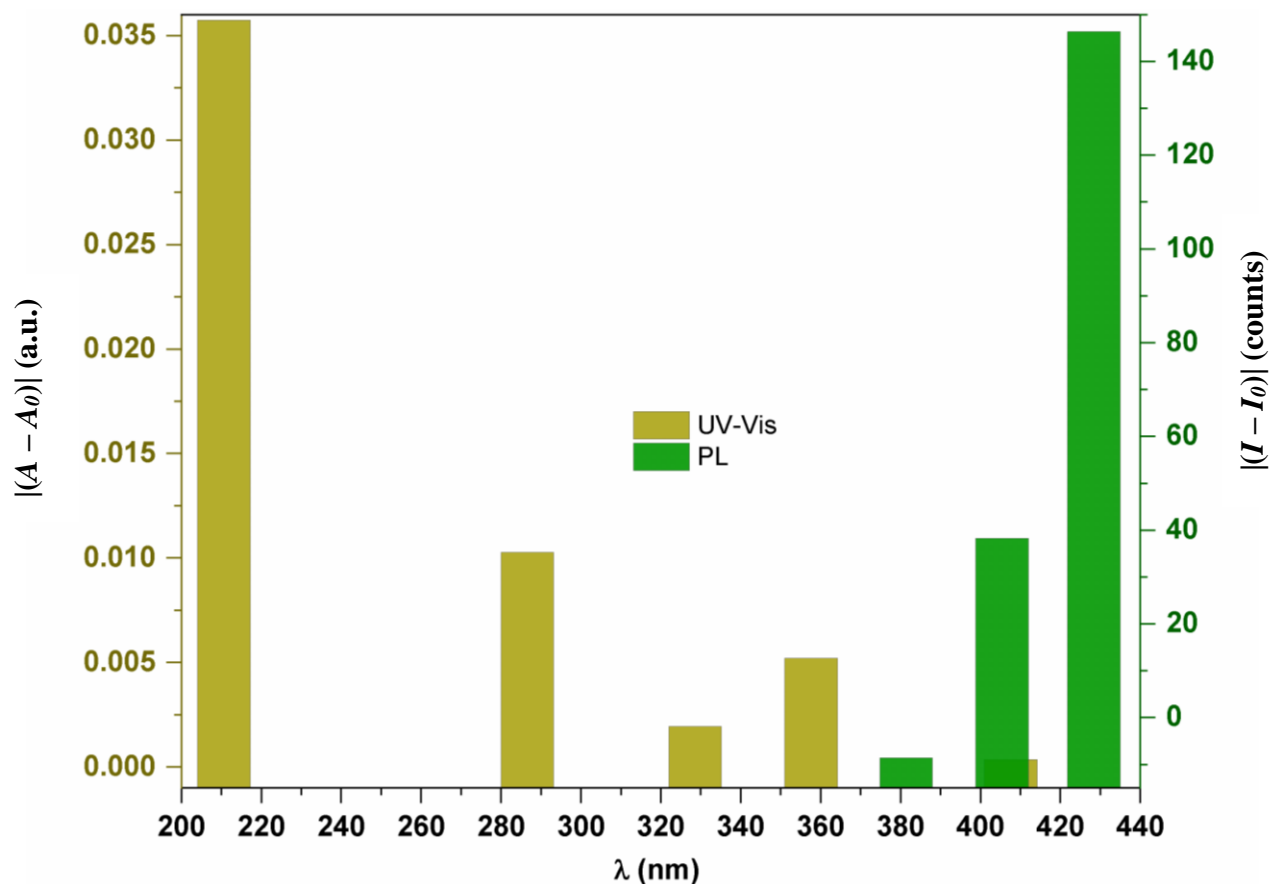

**Figure S24:** The relative changes in the UV-vis absorbance ( $|A - A_0|$ ; dark yellow bars) and the PL photon counts ( $|I - I_0|$ ; green bars) for the 2mL of 12.5  $\mu\text{M}$  methanolic solution of **1-Dy** in the presence of 5 equivalents (with respect to Dy ion) of  $\text{NH}_4\text{F}$  at room temperature.

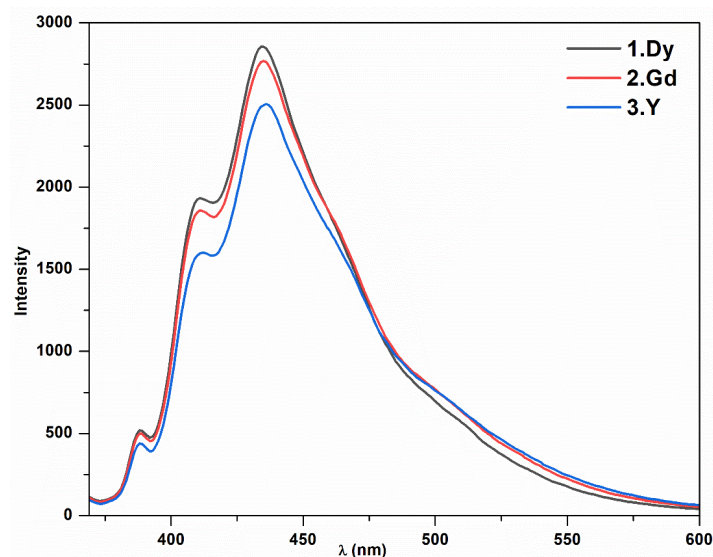

**Figure S25:** The comparative photoluminescence spectra of the methanolic solutions of **1-Y** (red), **1-Dy** (black) and **1-Gd** (blue), recorded in MeOH at room temperature upon excitation at 397 nm. The characteristic data and measurement details are provided in experimental section.

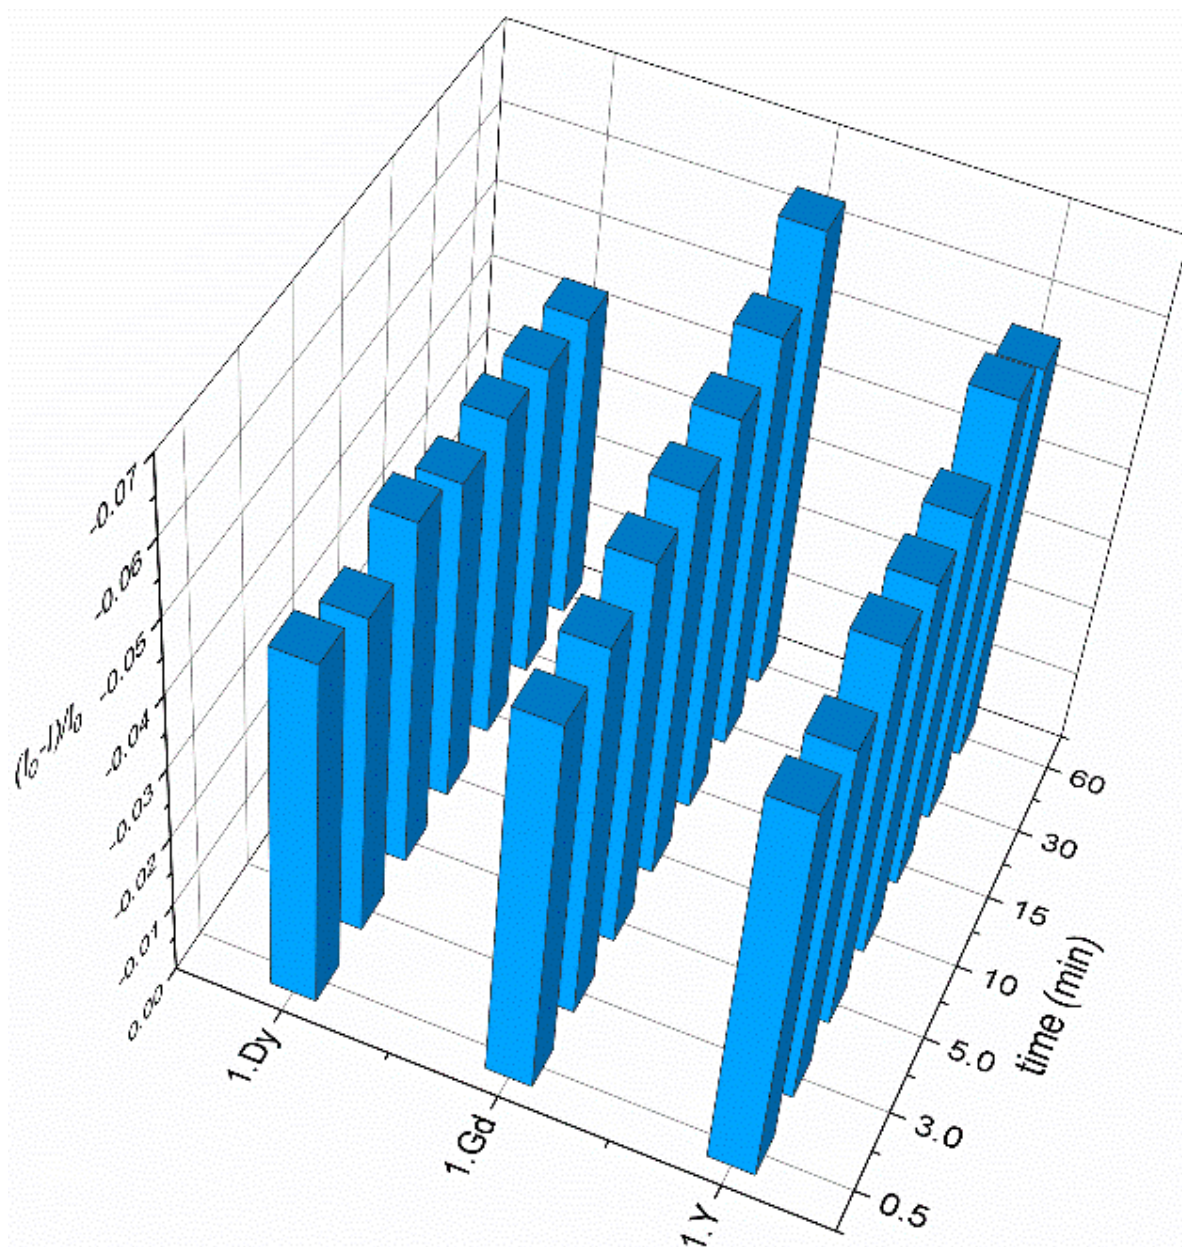

**Figure S26:** The time-dependent changes of the relative photon counts,  $(I_0 - I)/I_0$ , at  $\lambda_{max}^{em} = 435$  nm in the PL spectra for the 12.5  $\mu\text{M}$  solutions of  $\mathbf{1}\cdot\text{Ln}$  (Ln = Y, Gd and Dy) in the presence of 5 equivalents of  $\text{F}^-$  per Ln ion of the 1D coordination polymers,  $\mathbf{1}\cdot\text{Ln}$ . The time ( $t$ ) was varied between 30 seconds – 2h at room temperature.  $I_0$  corresponds to the photon counts in the absence of  $\text{F}^-$  ion, while  $I$  correspond to the photon counts at time  $t$  after addition of 5 equivalents (with respect to the Ln centre) of  $\text{F}^-$  ion in aqueous methanolic (1:1, v/v) into the respective solution of  $\mathbf{1}\cdot\text{Ln}$ .



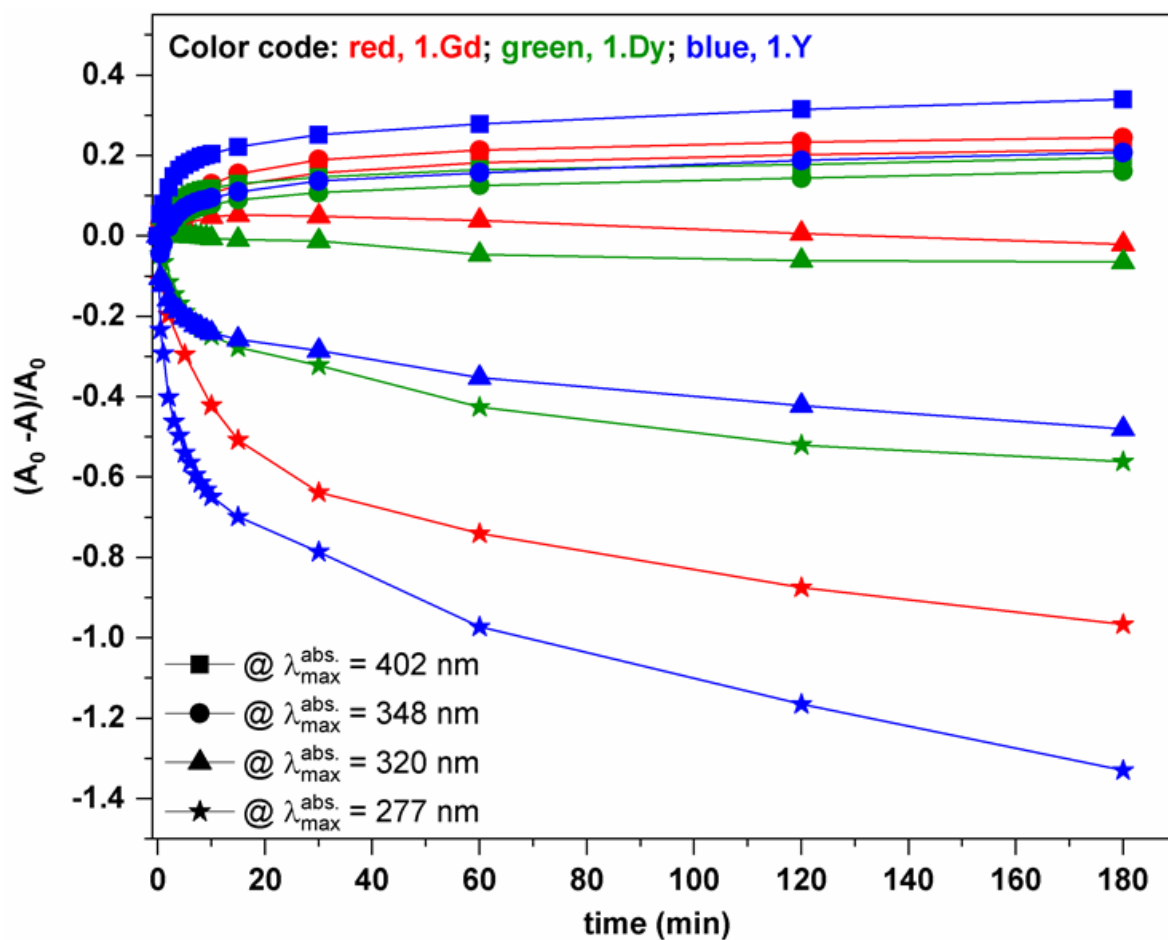

**Figure S27:** The time-dependent UV-Vis absorption changes (relative;  $(A_0 - A)/A_0$ ) for 12.5  $\mu\text{M}$  (with respect to Ln centre) methanolic solutions of **1·Dy** (green), **1·Gd** (red) and **1·Y** (blue) at  $\lambda_{max}^{abs.} = 277 \text{ nm}$  (solid stars), 320 nm (solid up-triangles), 348 nm (solid circles), and 402 nm (solid squares) upon treatment with 25 equivalents of  $\text{NH}_4\text{F}$  in aqueous methanolic (1:1 v/v) solution at room temperature. The solid lines are eye-guides only.  $A_0$  corresponds to the absorbance in the absence of  $\text{F}^-$  ion, while  $A$  corresponds to the absorbance at time  $t$ .

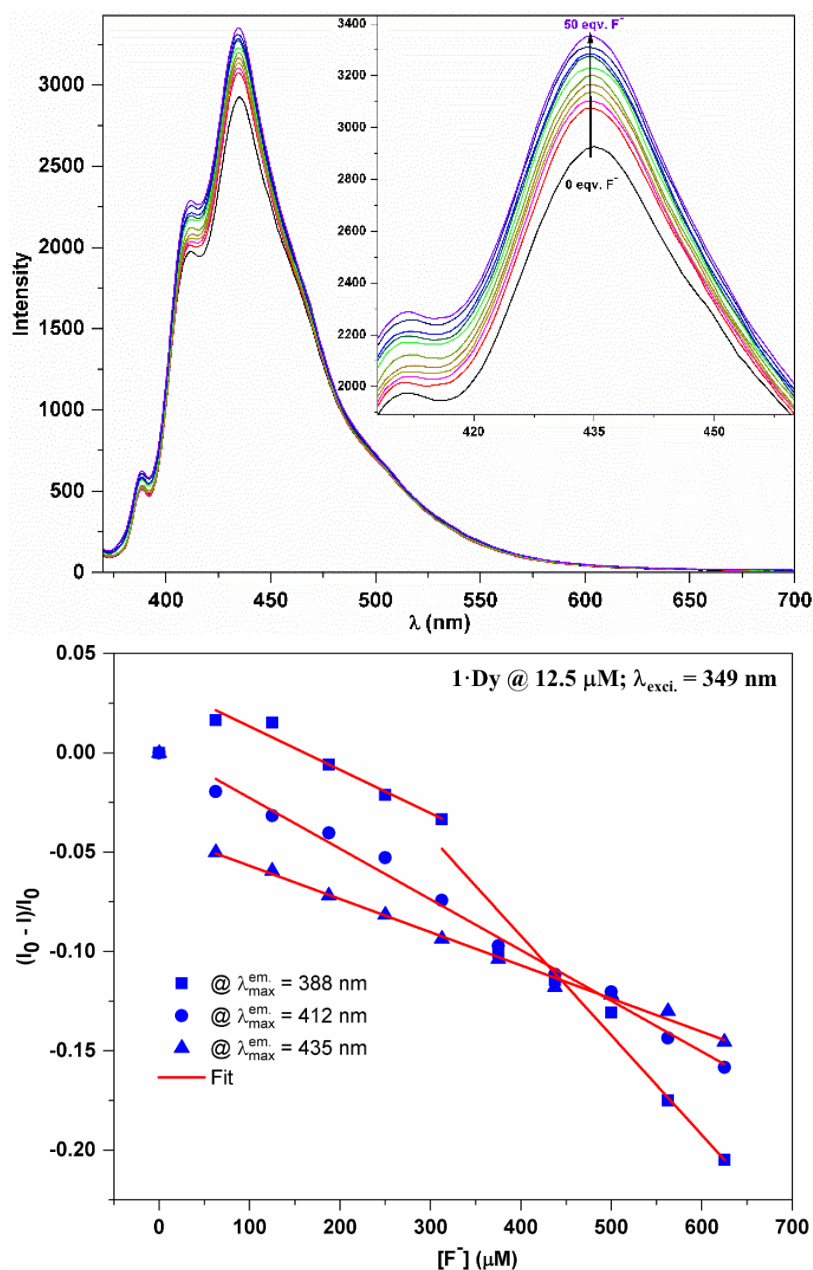

**Figure S28:** The room temperature steady-state PL spectral change (*top*) and the corresponding calibration plots (*bottom*) with 12.5  $\mu\text{M}$  (with respect to Ln centre) methanolic solutions of **1·Dy** at the excitation wavelength of 349 nm upon titration with aqueous methanolic (1:1 v/v) solution of  $\text{NH}_4\text{F}$  in the range of 0 – 650  $\mu\text{M}$ . The inset is the expanded region in the ranges as mentioned in the ordinate and abscissa. The relative change in photon counts,  $(I_0 - I)/I_0$ , at emission maxima  $\lambda_{max}^{em} = 388$  nm (solid squares), 412 nm (solid circles), and 435 nm (solid triangles) along with the best fits (the solid red lines) are plotted against the concentration of  $\text{F}^-$ , where  $I_0$  and  $I$  stand for the photon counts of the 12.5  $\mu\text{M}$  solutions of the 1D coordination polymers **1·Ln** (Ln = Y, Gd and Dy) in the absence of  $\text{NH}_4\text{F}$  and in the presence of  $\text{NH}_4\text{F}$ , respectively. The limit of detections (LoD's) for different 1D coordination polymers at different emission maxima are tabulated below (Table S4).

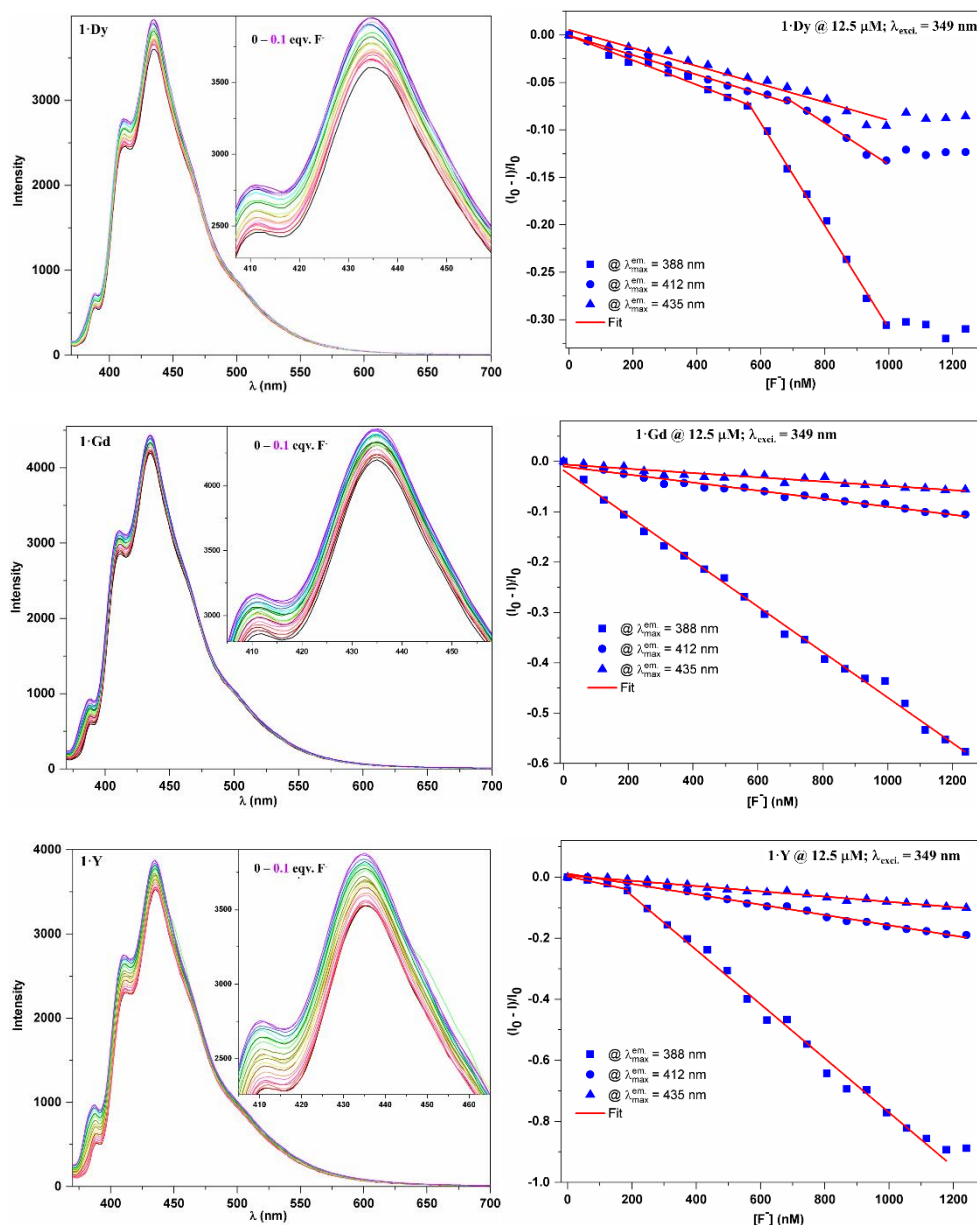

**Figure S29:** The room temperature steady-state PL spectral change (left) and the corresponding calibration plots (right) with solutions of **1·Dy** (top), **1·Gd** (middle) and **1·Y** (bottom) at the excitation wavelength of 349 nm upon titration with  $\text{NH}_4\text{F}$ . The micromolar ( $\mu\text{M}$ ; with respect to Ln centre in the 1D coordination polymers) stock solutions in methanol are titrated with millimolar (mM) aqueous methanolic (1:1 v/v) solution of  $\text{NH}_4\text{F}$  such that the 1D coordination polymers are at 12.5  $\mu\text{M}$  strengths and the concentrations of  $\text{F}^-$  are varied between 0 – 1250 nM in the study solutions. The inset is the expanded region in the ranges as mentioned in the ordinate and abscissa. The relative change in photon counts,  $(I_0 - I)/I_0$ , at emission maxima  $\lambda_{max}^{em.} = 388$  nm (solid squares), 412 nm (solid circles), and 435 nm (solid triangles) along with the best fits (the solid red lines) are plotted against the concentration of  $\text{F}^-$ , where  $I_0$  and  $I$  stand for the photon counts of the 12.5  $\mu\text{M}$  solutions of the 1D coordination polymers **1·Ln** (Ln = Y, Gd and Dy) in the absence of  $\text{NH}_4\text{F}$  and in the presence of  $\text{NH}_4\text{F}$ , respectively. The limit of detections (LoD's) for different 1D coordination polymers at different emission maxima are tabulated below (Table S5).

**Table S4.** The limit of detections (LoD's) of F<sup>-</sup> by **1•Dy** at different emission maximum and different F- concentration domains micromolar (μM) range. The calculations are based on the conventional  $3\sigma/m$  method where  $\sigma$  stands for the standard deviation of the blank and  $m$  stands for the slope of the calibration plots with respect to the relative change in photon counts. The experimental conditions are as described in the figure above (Figure S28).

| [F <sup>-</sup> ]     | LoD (μM) | $\lambda_{max}^{em.} = 435 \text{ nm}$ | $\lambda_{max}^{em.} = 412 \text{ nm}$ | $\lambda_{max}^{em.} = 388 \text{ nm}$ |
|-----------------------|----------|----------------------------------------|----------------------------------------|----------------------------------------|
| 60 – 300 μM           |          |                                        |                                        | 3.067823                               |
| 300 – 625 μM          |          |                                        |                                        | 1.336479                               |
| 60 – 625 μM (average) |          | 31.5982                                | 37.29363                               | 2.202151                               |

**Table S5.** The limit of detection (LoD) of F<sup>-</sup> by **1•Ln** (Ln = Y, Gd and Dy) at different emission maximum for the F- concentrations in the nanomolar (nM) range. The calculations are based on the conventional  $3\sigma/m$  method where  $\sigma$  stands for the standard deviation of the blank and  $m$  stands for the slope of the calibration plots with respect to the relative change in photon counts. The experimental conditions are as described in the figure above (Figure S29).

| LoD (μM)    | $\lambda_{max}^{em.} = 435 \text{ nm}$ | $\lambda_{max}^{em.} = 412 \text{ nm}$ | $\lambda_{max}^{em.} = 388 \text{ nm}$ |
|-------------|----------------------------------------|----------------------------------------|----------------------------------------|
| <b>1•Y</b>  | 722.834                                | 473.436                                | 7.54                                   |
| <b>1•Gd</b> |                                        | 1001.386                               | 14.842                                 |
| <b>1•Dy</b> | 1466.15                                | 313.399                                | 16.083                                 |

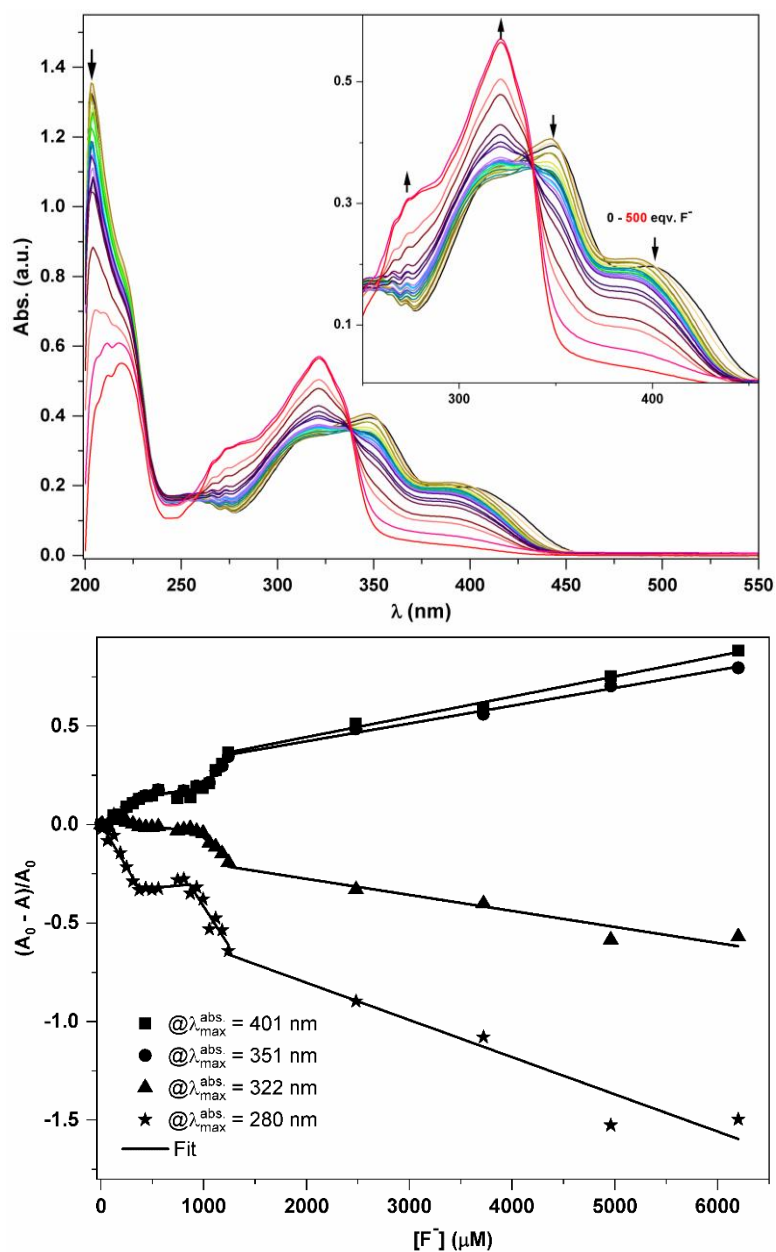

**Figure S30: Top:** The UV-Vis absorption spectral changes for 12.5  $\mu\text{M}$  (with respect to Ln centre) methanolic solutions of **1-Dy** at room temperature upon titration with aqueous methanolic (1:1, v/v) solution of  $\text{NH}_4\text{F}$  ranging between 0–500 equivalents (with respect to the Dy centre). The inset is the expanded region in the ranges as mentioned in the ordinate and abscissa. **Bottom:** The relative change in absorptions,  $(A_0 - A)/A_0$ , at the absorption maxima  $\lambda_{\text{max}}^{\text{abs}} = 280$  nm (solid stars), 322 nm (solid up-triangles), 351 nm (solid circles), and 401 nm (solid squares) are plotted against the concentration of  $\text{F}^-$  upon titration with 2 mL of 12.5  $\mu\text{M}$  solutions of the 1D coordination polymer **1-Dy**, where  $A_0$  and  $A$  stand for the absorbances of the 12.5  $\mu\text{M}$  solution in the absence of  $\text{NH}_4\text{F}$  and in the presence of  $\text{NH}_4\text{F}$ , respectively. The solid lines represent the best fits. The sensitivity for  $\text{F}^-$  is observed to be different at different absorption maximum as well as in different  $\text{F}^-$  concentration domains, which are tabulated below (Table S6).

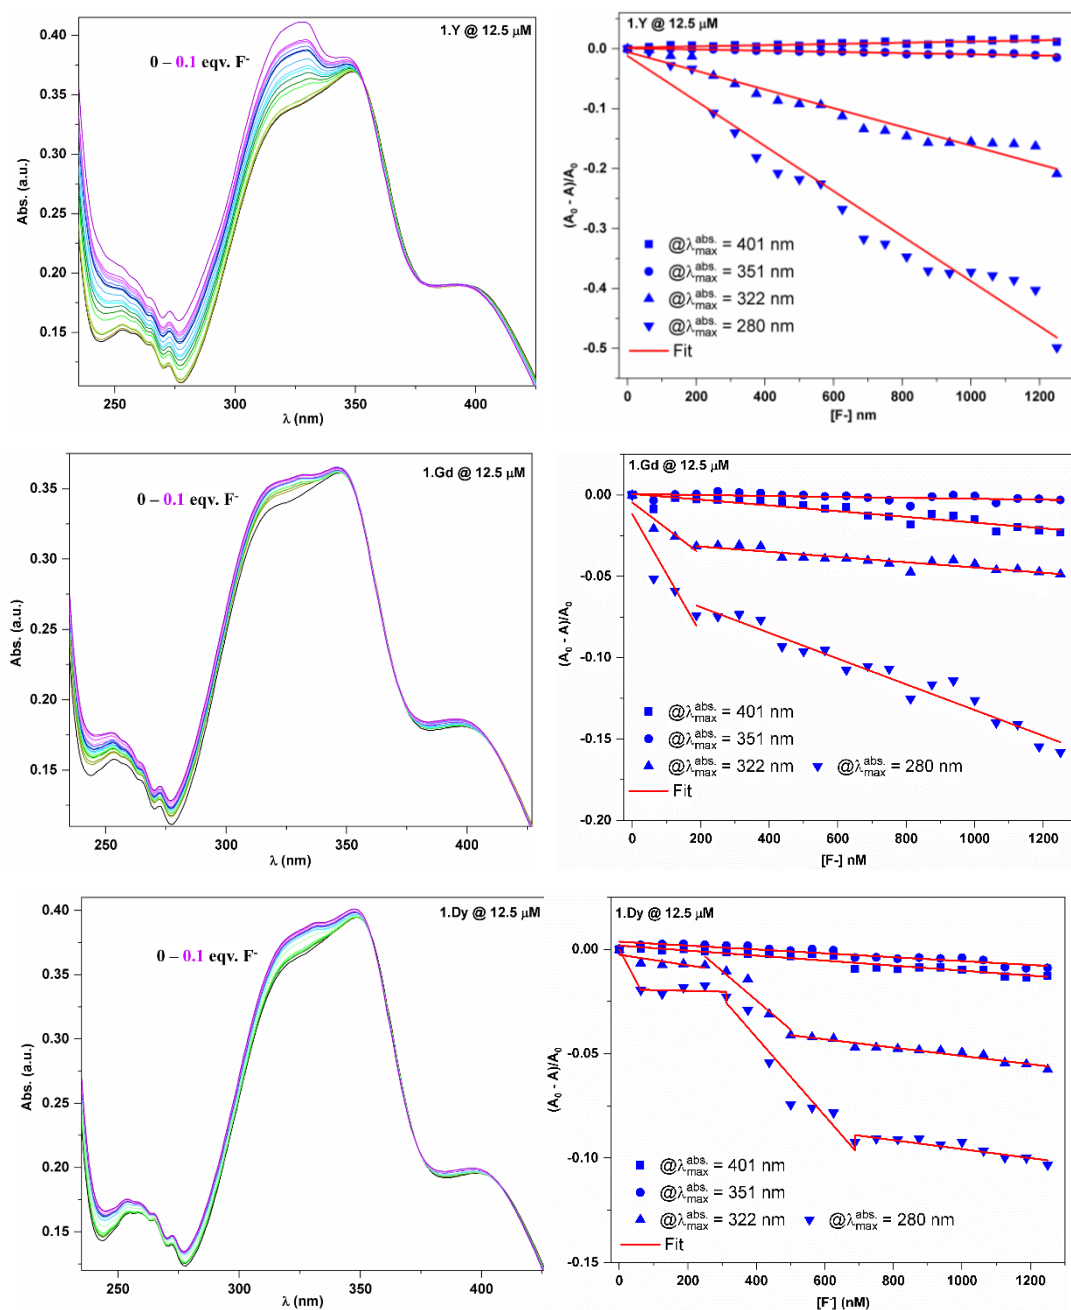

**Figure S31:** The room temperature UV-vis spectral change (left) and the corresponding calibration plots (right) with 12.5  $\mu\text{M}$  (with respect to Ln centre) methanolic solutions of **1·Dy** (top), **1·Gd** (middle) and **1·Y** (bottom) at 10 minutes time interval upon titration with aqueous methanolic (1:1 v/v) solution of  $\text{NH}_4\text{F}$  in the concentration range 0 – 1250 nM. The relative change in absorbances,  $(A_0 - I)/A_0$ , at the absorption maxima  $\lambda_{max}^{abs}$  (nm) = 401 (squares), 351 (circles), 322 (up-triangles), and 280 (down-triangles) along with the best fits (the solid red lines) are plotted against the concentration of  $\text{F}^-$ , where  $A_0$  and  $A$  stand for the absorbances of the 12.5  $\mu\text{M}$  solutions of the 1D coordination polymers **1·Ln** (Ln = Y, Gd and Dy) in the absence of  $\text{NH}_4\text{F}$  and in the presence of  $\text{NH}_4\text{F}$ , respectively. The limits of detections (LoD's) for different 1D coordination polymers at different emission maxima are tabulated below (Table S7).

**Table S6.** The limit of detections (LoD's) of F<sup>-</sup> by **1•Dy** at different absorption maximum and different F<sup>-</sup> concentration domains in the micromolar (μM) to milimolar (mM) range. The calculations are based on the conventional  $3\sigma/m$  method where  $\sigma$  stands for the standard deviation of the blank and  $m$  stands for the slope of the calibration plots with respect to the relative change in photon counts. The experimental conditions are as described in the figure above (Figure S30).

| LoD (μM)<br>[F]      | $\lambda_{max}^{abs.} = 401 \text{ nm}$ | $\lambda_{max}^{abs.} = 351 \text{ nm}$ | $\lambda_{max}^{abs.} = 322 \text{ nm}$ | $\lambda_{max}^{abs.} = 280 \text{ nm}$ |
|----------------------|-----------------------------------------|-----------------------------------------|-----------------------------------------|-----------------------------------------|
| 12.5 – 250 μM        | 0.277526                                | 0.543479                                | 6.436616                                | 0.468074                                |
| 250 – 500 μM         | 2.259547                                | 3.356639                                | 6.882433                                | 8.284917                                |
| 500 – 750 μM         | 0.123881                                | 0.273753                                | 0.459024                                | 0.511415                                |
| 750 – 3 000 μM       | 0.899086                                | 2.048592                                | 2.652234                                | 2.197591                                |
| 12.5 – 3000 μM (av.) | 0.89001                                 | 1.555616                                | 4.107577                                | 2.865499                                |

**Table S7.** The limit of detections (LoD's) of F<sup>-</sup> by **1•Ln** (Ln = Y, Gd and Dy) at different absorption maximum and different F<sup>-</sup> concentration domains in the nanomolar (nM) range. The calculations are based on the conventional  $3\sigma/m$  method where  $\sigma$  stands for the standard deviation of the blank and  $m$  stands for the slope of the calibration plots with respect to the relative change in photon counts. The experimental conditions are as described in the figure above (Figure S31).

| LoD (μM)<br>[F]   | $\lambda_{max}^{abs.} = 401 \text{ nm}$ | $\lambda_{max}^{abs.} = 351 \text{ nm}$ | $\lambda_{max}^{abs.} = 322 \text{ nm}$ | $\lambda_{max}^{abs.} = 280 \text{ nm}$ |
|-------------------|-----------------------------------------|-----------------------------------------|-----------------------------------------|-----------------------------------------|
| for <b>1•Y</b>    |                                         |                                         |                                         |                                         |
| 0 – 1250 nM       | 18.26228876                             | 37.01282186                             | 2.76286781                              | 0.220441439                             |
| for <b>1•Gd</b>   |                                         |                                         |                                         |                                         |
| 0 – 190 nM        | 10.5                                    | 1276.3                                  | 6.14641                                 | 2.26094                                 |
| 190 – 1250 nM     | 10.5                                    | 1276.3                                  | 26.8371                                 | 10.4749                                 |
| 0 – 1250 nM (av.) | 10.5                                    | 1276.3                                  | 16.4918                                 | 6.36793                                 |
| for <b>1•Dy</b>   |                                         |                                         |                                         |                                         |
| 0 – 60 nM         | 15.4                                    | 40                                      | 11.95362                                | 2.89985                                 |
| 60 – 250 nM       | 15.4                                    | 40                                      | 11.95362                                | 230.11664                               |
| 250 – 690 nM      | 15.4                                    | 40                                      | 2.14038                                 | 4.78309                                 |
| 690 – 1250 nM     | 15.4                                    | 40                                      | 15.10323                                | 41.7837                                 |
| 0 – 1250 nM (av.) | 15.4                                    | 40                                      | 9.73241                                 | 69.89582                                |

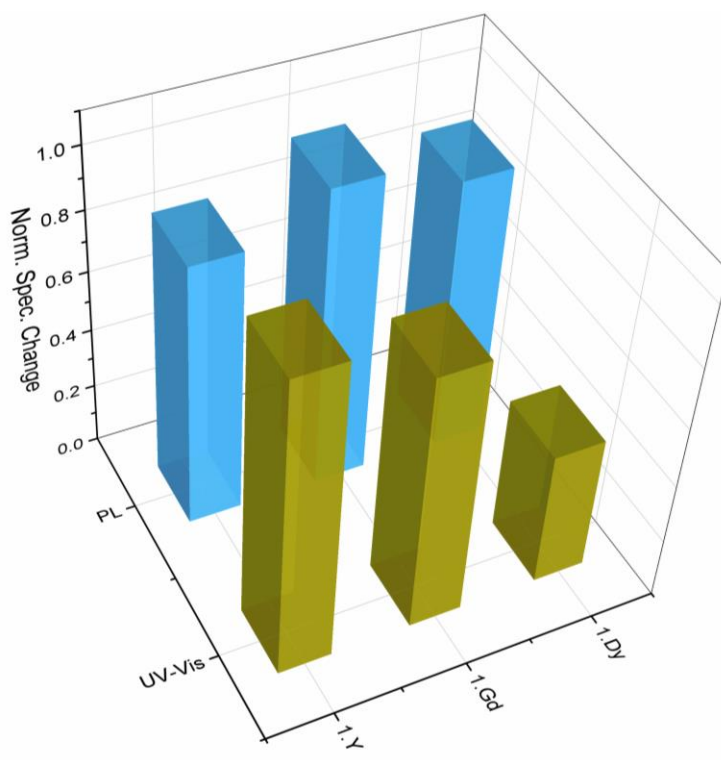

**Figure S32:** The changes in photon counts relative to **1·Gd**,  $(I - I_0)_{1·Gd}/(I - I_0)_{1·Ln}$ , of the PL spectra at  $\lambda_{max}^{em} = 435$  nm (cyan), and the changes in absorbances relative to **1·Y**,  $(A - A_0)_{1·Y}/(A - A_0)_{1·Ln}$ , of the UV-Vis spectra at  $\lambda_{max}^{abs} = 280$  nm (yellow) of the 2 mL of 12.5  $\mu$ M methanolic solutions of **1·Ln** upon treatment (30 seconds of delay time for PL and 30 minutes of delay time for UV-Vis) with aqueous-methanolic (1:1, v/v) solution of  $NH_4F$  (5 eq. for PL and 25 eqv. for UV-Vis) at room temperature.

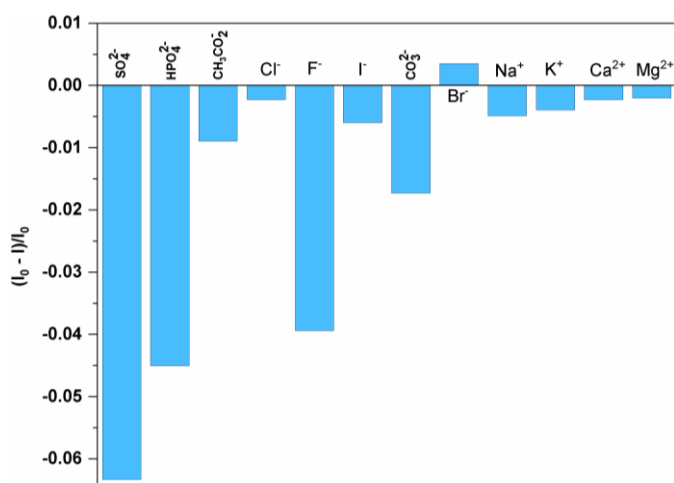

**Figure S33:** The relative changes in steady-state photon counts,  $(I_0 - I)/I_0$ , at room temperature and emission maximum  $\lambda_{max}^{em} = 435$  nm for 12.5  $\mu$ M (with respect to Ln center) methanolic solution of **1·Dy** at the excitation wavelength of 349 nm upon treatment with 50 equivalents (with respect to the Dy centre in the 1D coordination polymer **1·Dy**) of various anions with the common  $NH_4^+$  cation in aqueous methanolic (1:1 v/v) solutions and various cations with the common  $NO_3^-$  anion in aqueous methanolic (1:1 v/v) solutions.





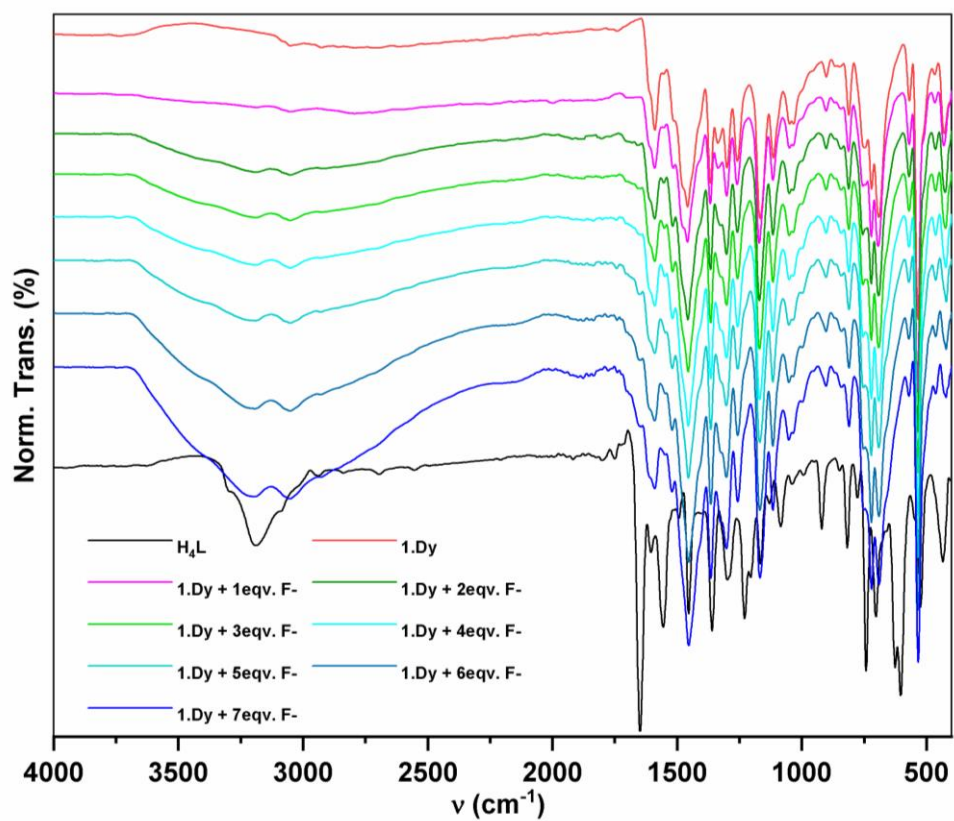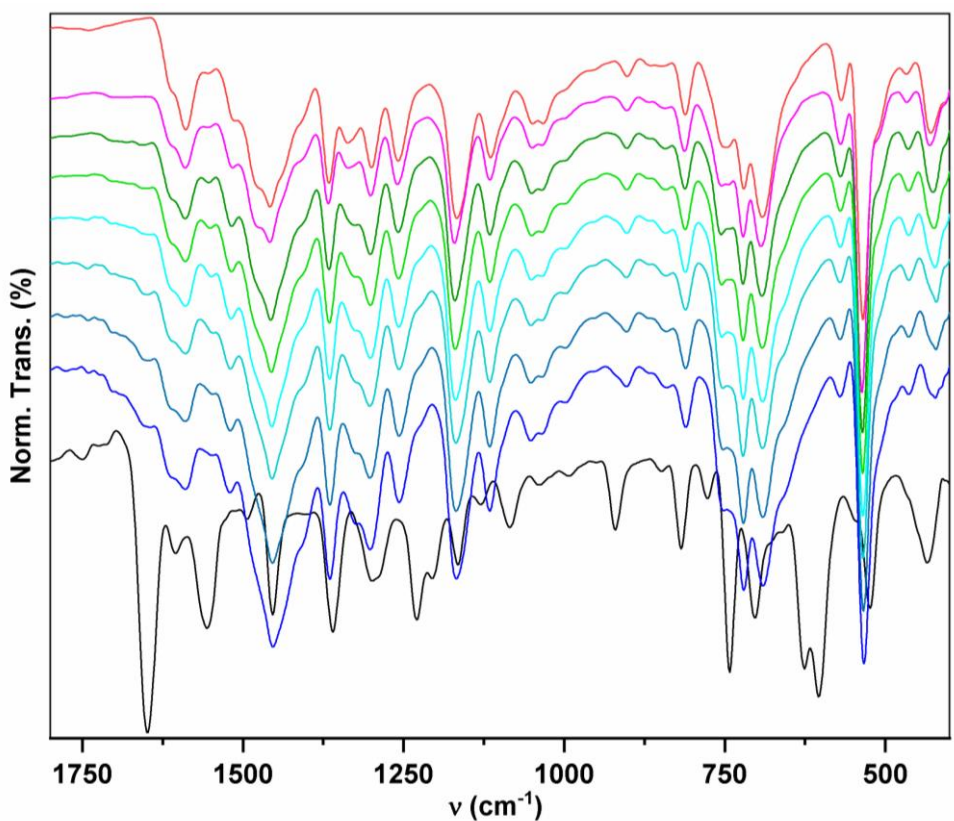

**Figure S34:** Solid-state FT-IR spectra (full range on the top and expanded at the bottom) of the complex **1.Dy** upon treatment with 0-7 eq. of solid  $\text{NH}_4\text{F}$  at room temperature under aerobic conditions.

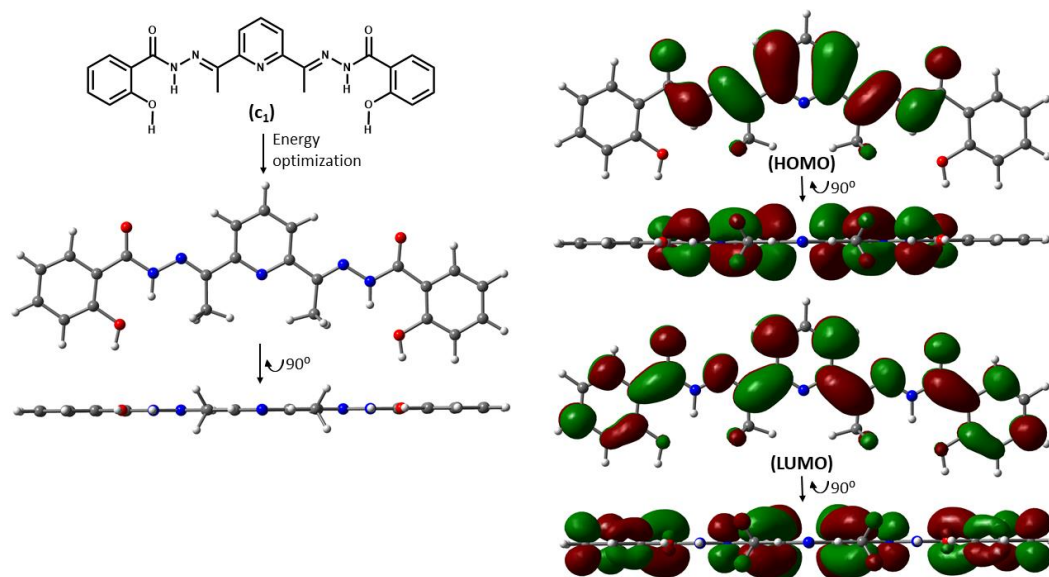

**Chart S1:** Schematic structure of **c<sub>1</sub>** (*top-left*) as used for the initial guess in its gas-phase energy optimization; the gas-phase energy optimized geometry of **c<sub>1</sub>** viewed along the axis perpendicular (*middle-left*) and parallel (*bottom-left*) to the plane of its pyridyl moiety; the isosurfaces (*isovalue* = 0.02; the green and brown coloured surfaces representing the mutually opposite phases of the corresponding wave function) corresponding to the HOMO (*top-right*) and LUMO (*bottom-right*) in the gas-phase energy optimized geometry of **c<sub>1</sub>**.

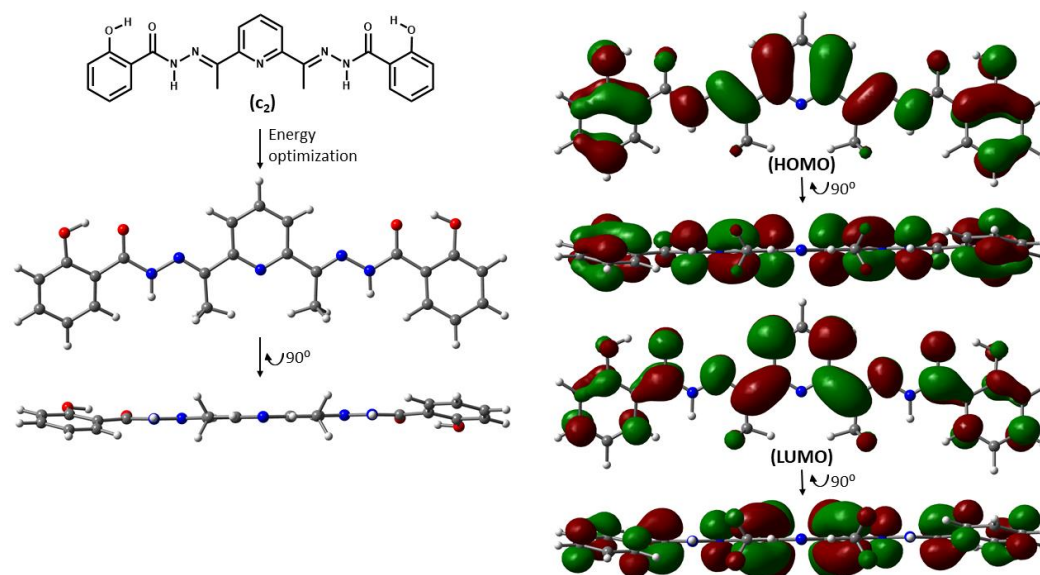

**Chart S2:** Schematic structure of **c<sub>2</sub>** (*top-left*) as used for the initial guess in its gas-phase energy optimization; the gas-phase energy optimized geometry of **c<sub>2</sub>** viewed along the axis perpendicular (*middle-left*) and parallel (*bottom-left*) to the plane of its pyridyl moiety; the isosurfaces (*isovalue* = 0.02; the green and brown colored surfaces representing the mutually opposite phases of the corresponding wave function) corresponding to the HOMO (*top-right*) and LUMO (*bottom-right*) in the gas-phase energy optimized geometry of **c<sub>2</sub>**.

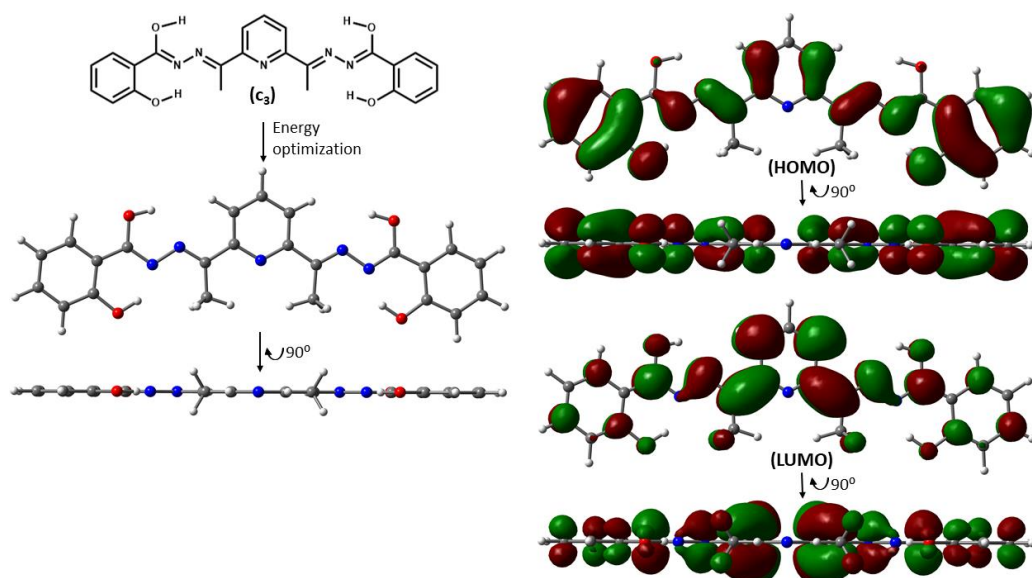

**Chart S3:** Schematic structure of **c<sub>3</sub>** (*top-left*) as used for the initial guess in its gas-phase energy optimization; the gas-phase energy optimized geometry of **c<sub>3</sub>** viewed along the axis perpendicular (*middle-left*) and parallel (*bottom-left*) to the plane of its pyridyl moiety; the isosurfaces (*isovalue* = 0.02; the green and brown colored surfaces representing the mutually opposite phases of the corresponding wave function) corresponding to the HOMO (*top-right*) and LUMO (*bottom-right*) in the gas-phase energy optimized geometry of **c<sub>3</sub>**.

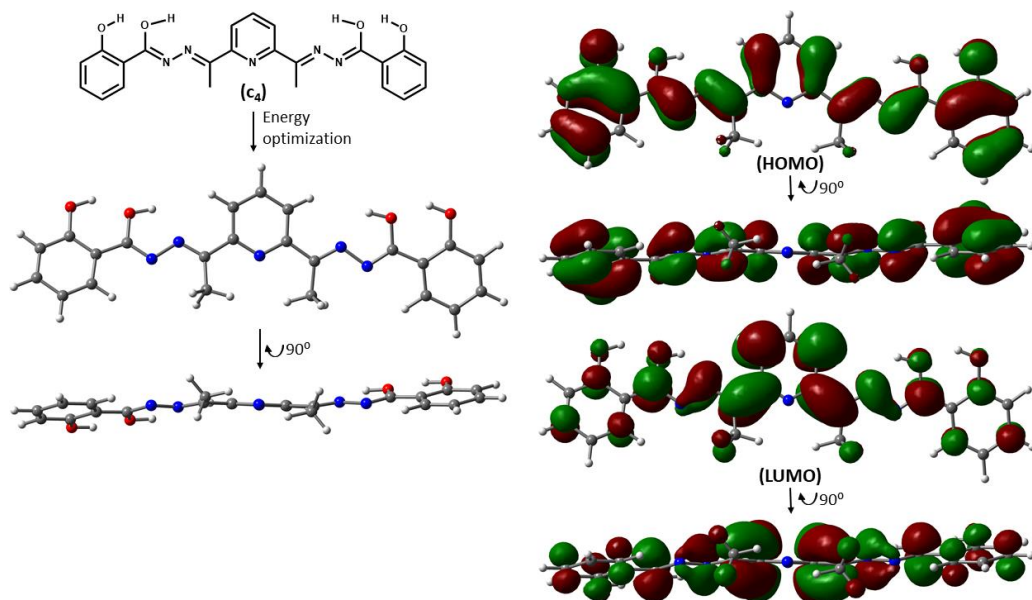

**Chart S4:** Schematic structure of **c<sub>4</sub>** (*top-left*) as used for the initial guess in its gas-phase energy optimization; the gas-phase energy optimized geometry of **c<sub>4</sub>** viewed along the axis perpendicular (*middle-left*) and parallel (*bottom-left*) to the plane of its pyridyl moiety; the isosurfaces (*isovalue* = 0.02; the green and brown colored surfaces representing the mutually opposite phases of the corresponding wave function) corresponding to the HOMO (*top-right*) and LUMO (*bottom-right*) in the gas-phase energy optimized geometry of **c<sub>4</sub>**.



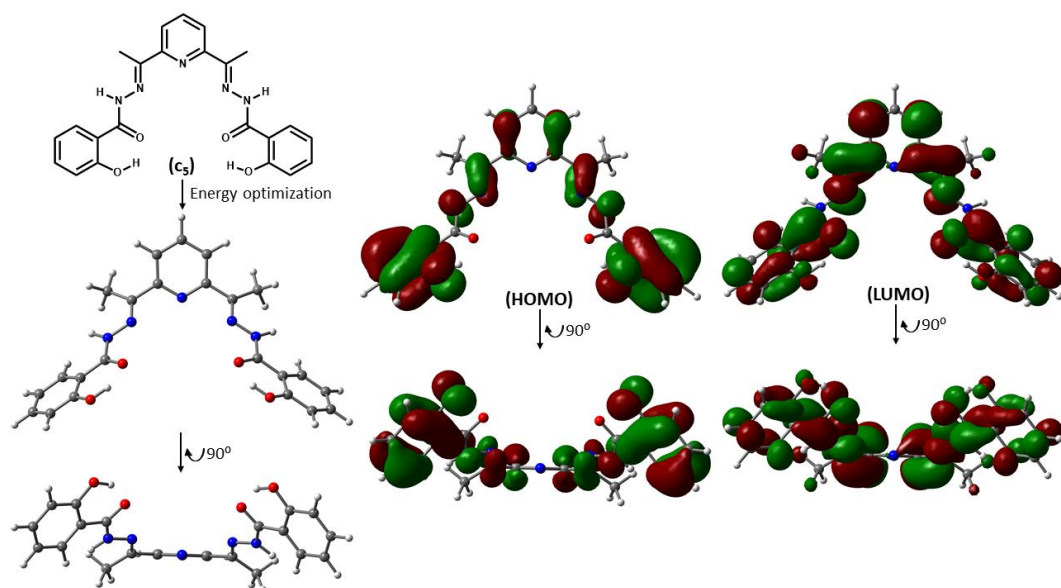

**Chart S5:** Schematic structure of **c<sub>5</sub>** (*top-left*) as used for the initial guess in its gas-phase energy optimization; the gas-phase energy optimized geometry of **c<sub>5</sub>** viewed along the axis perpendicular (*middle-left*) and parallel (*bottom-left*) to the plane of its pyridyl moiety; the isosurfaces (*isovalue* = 0.02; the green and brown coloured surfaces representing the mutually opposite phases of the corresponding wave function) corresponding to the HOMO (*top-right*) and LUMO (*bottom-right*) in the gas-phase energy optimized geometry of **c<sub>5</sub>**.

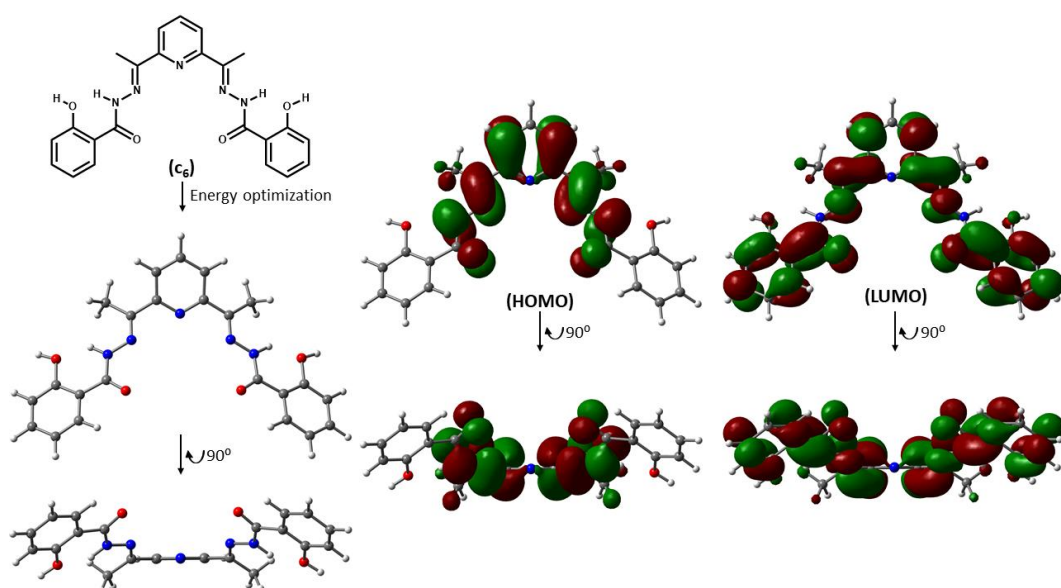

**Chart S6:** Schematic structure of **c<sub>6</sub>** (*top-left*) as used for the initial guess in its gas-phase energy optimization; the gas-phase energy optimized geometry of **c<sub>6</sub>** viewed along the axis perpendicular (*middle-left*) and parallel (*bottom-left*) to the plane of its pyridyl moiety; the isosurfaces (*isovalue* = 0.02; the green and brown colored surfaces representing the mutually opposite phases of the corresponding wave function) corresponding to the HOMO (*top-right*) and LUMO (*bottom-right*) in the gas-phase energy optimized geometry of **c<sub>6</sub>**.

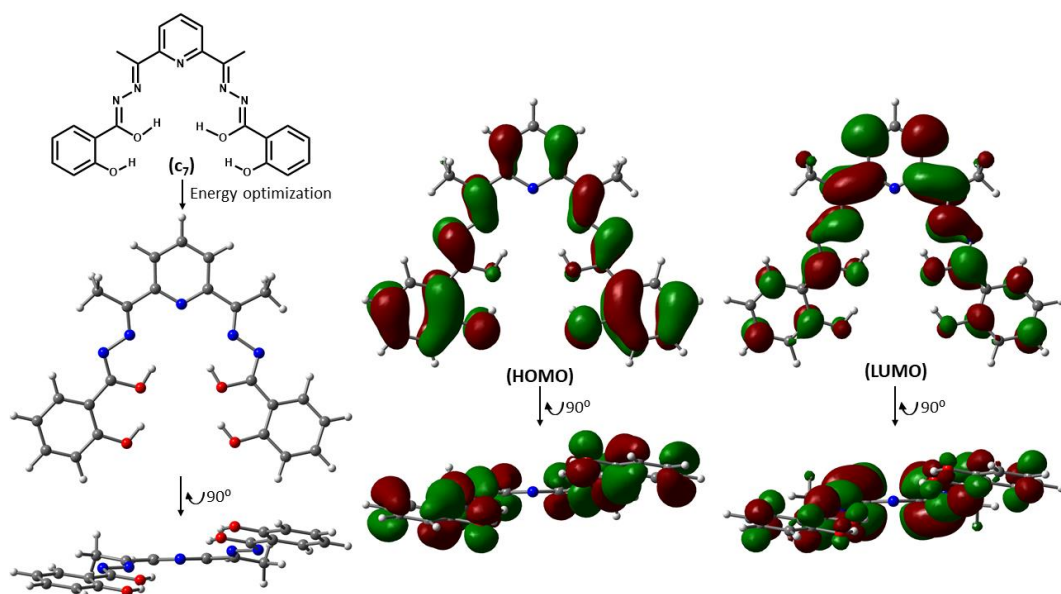

**Chart S7:** Schematic structure of **c7** (*top-left*) as used for the initial guess in its gas-phase energy optimization; the gas-phase energy optimized geometry of **c7** viewed along the axis perpendicular (*middle-left*) and parallel (*bottom-left*) to the plane of its pyridyl moiety; the isosurfaces (*isovalue* = 0.02; the green and brown colored surfaces representing the mutually opposite phases of the corresponding wave function) corresponding to the HOMO (*top-right*) and LUMO (*bottom-right*) in the gas-phase energy optimized geometry of **c7**.

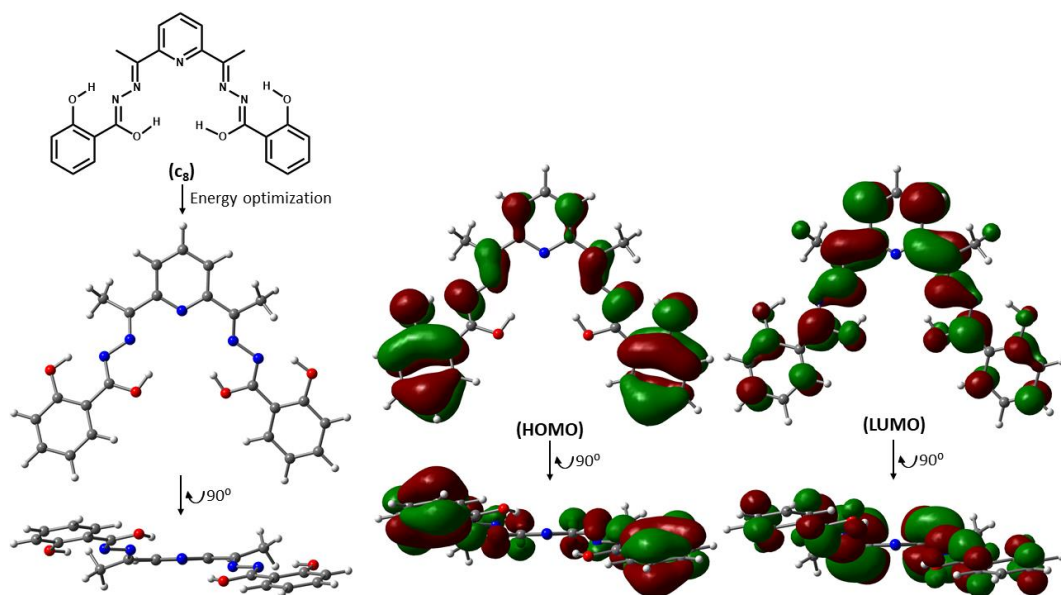

**Chart S8:** Schematic structure of **c8** (*top-left*) as used for the initial guess in its gas-phase energy optimization; the gas-phase energy optimized geometry of **c8** viewed along the axis perpendicular (*middle-left*) and parallel (*bottom-left*) to the plane of its pyridyl moiety; the isosurfaces (*isovalue* = 0.02; the green and brown colored surfaces representing the mutually opposite phases of the corresponding wave function) corresponding to the HOMO (*top-right*) and LUMO (*bottom-right*) in the gas-phase energy optimized geometry of **c8**.

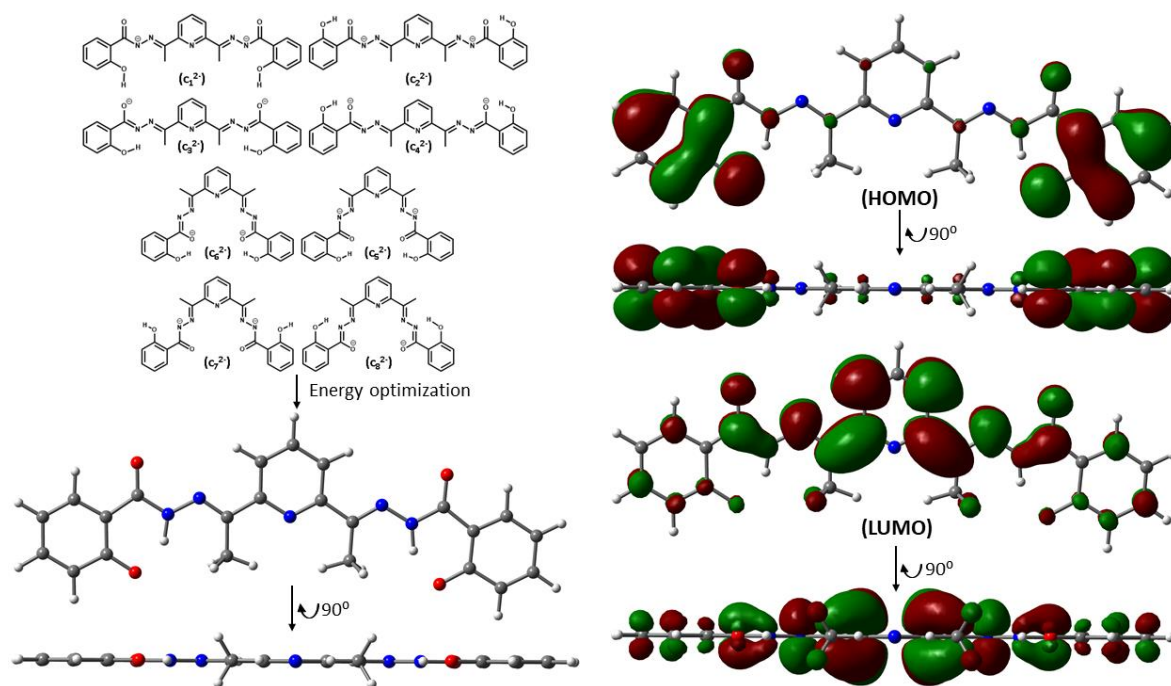

**Chart S9:** Schematic structures corresponding to the doubly deprotonated forms ( $\text{H}_2\text{L}^{2-}$ ) of the ligand (*top-left*) which were used for the initial guesses for the gas-phase energy optimization; the gas-phase energy optimized geometry of  $\text{H}_2\text{L}^{2-}$  viewed along the axis perpendicular (*middle-left*) and parallel (*bottom-left*) to the plane of its pyridyl moiety; the isosurfaces (*isovalue* = 0.02; the green and brown colored surfaces representing the mutually opposite phases of the corresponding wave function) corresponding to the HOMO (*top-right*) and LUMO (*bottom-right*) in the gas-phase energy optimized geometry of  $\text{H}_2\text{L}^{2-}$ .

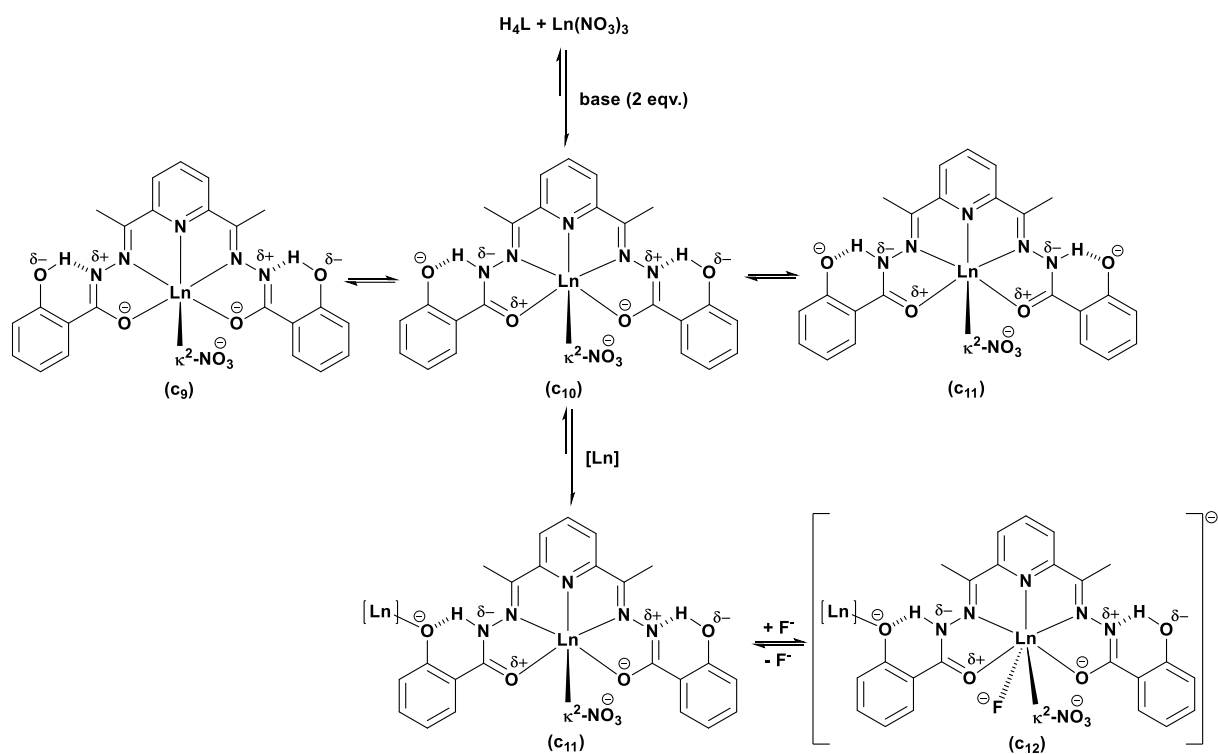

**Scheme S2.** Schematic representation for the keto-iminolate tautomerization and intramolecular proton transfer in the building-block mimics (omitting TPPO) of the mononuclear complexes ( $c_9$ - $c_{11}$ ); 1D coordination polymers ( $c_{12}$ ), and the fluorinated form of the 1D coordination polymers ( $c_{13}$ )



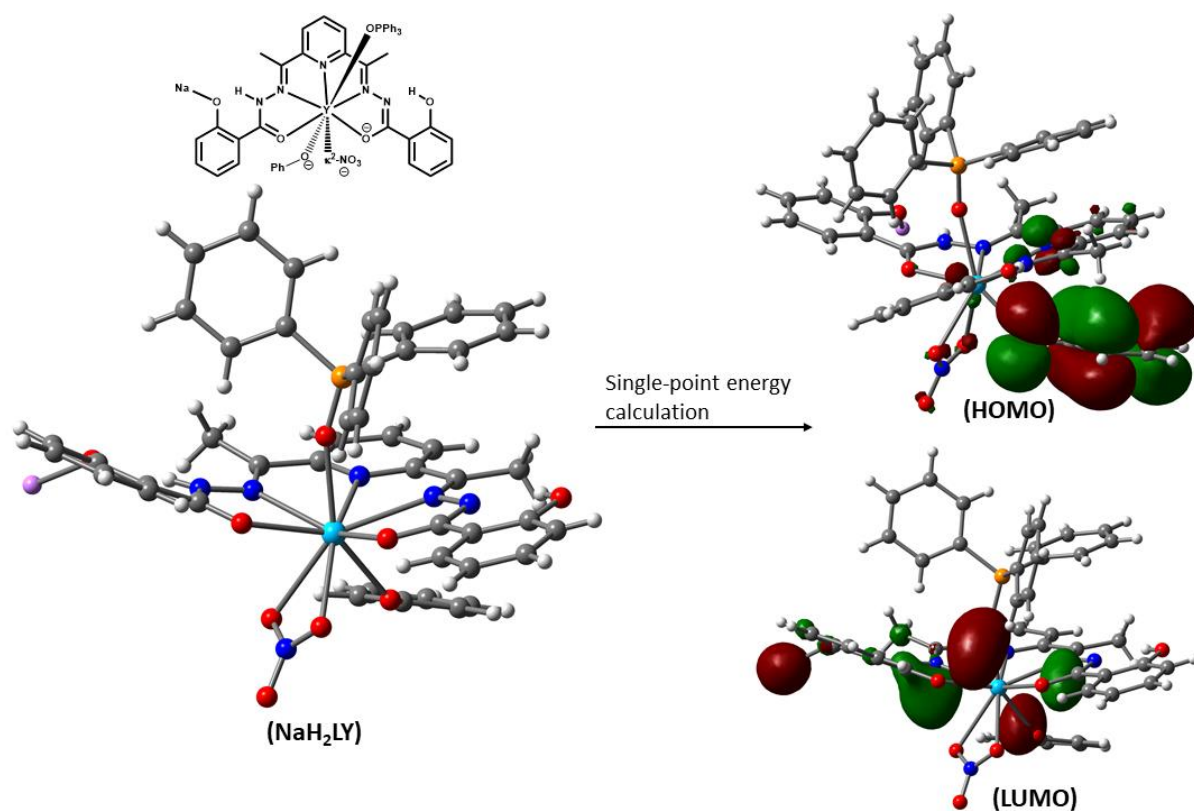

**Chart S10:** Schematic structure of the hypothetical monomeric model complex  $\text{NaH}_2\text{LY}$  (*top-left*) representing the building units of the 1D coordination polymer  $\mathbf{1}\cdot\mathbf{Y}$ ; the corresponding solid-state structure of  $\text{NaH}_2\text{LY}$  (*bottom-left*) as truncated from the single-crystal X-ray structure of the 1D coordination polymer  $\mathbf{1}\cdot\mathbf{Y}$  upon replacing the neighbouring Y(III) ion with  $\text{Na}^+$  ion and upon replacing the bridging phenolic group of the neighbouring building unit with the phenolate ion; the isosurfaces (*isovalue* = 0.02; the green and brown colored surfaces representing the mutually opposite phases of the corresponding wave function) corresponding to the HOMO (*top-right*) and LUMO (*bottom-right*) in the solid-state geometry of  $\text{NaH}_2\text{LY}$  as truncated from  $\mathbf{1}\cdot\mathbf{Y}$ .

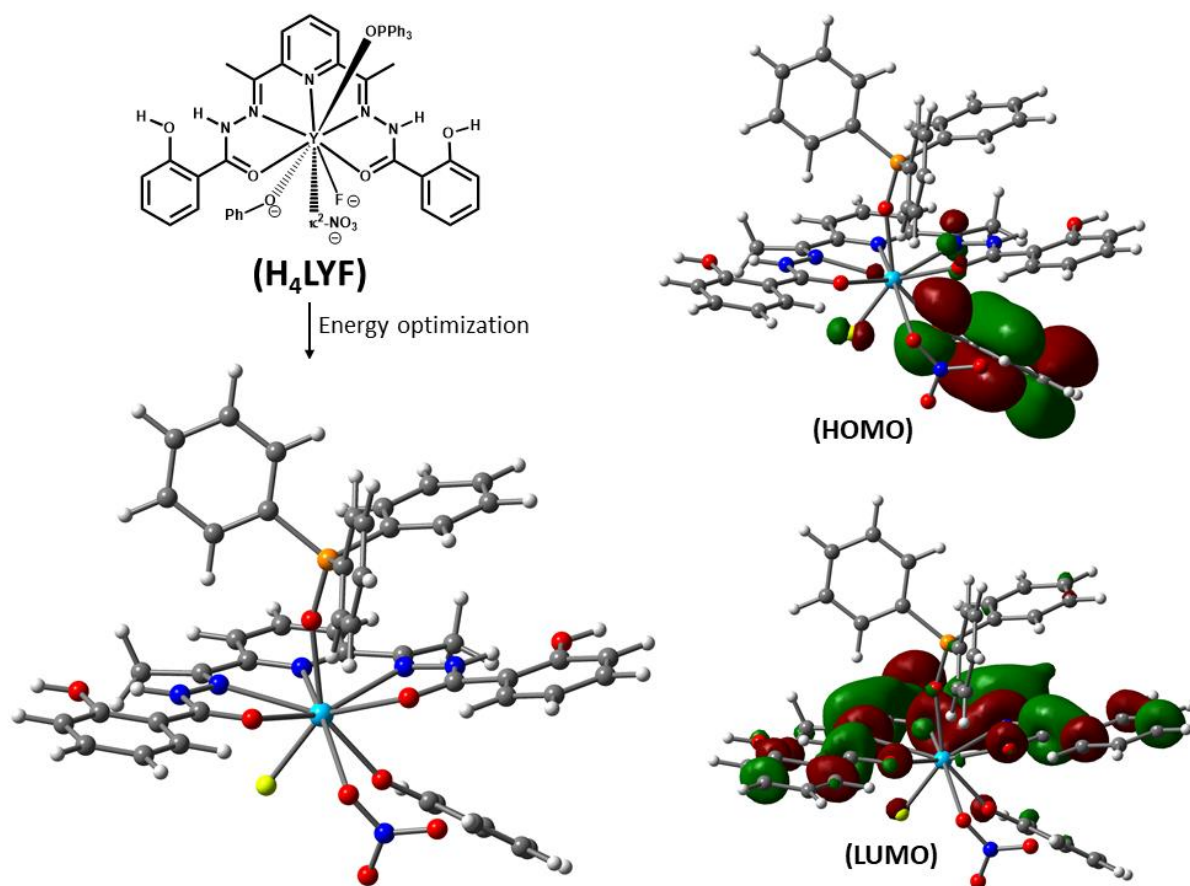

**Chart S11:** Schematic structures of the hypothetical monomeric model complex **H<sub>4</sub>LYF** (*top-left*), representing the building units of the fluorinated congener of the 1D coordination polymer **1•Y**, which were used for the initial guesses for the gas-phase energy optimization; the gas-phase energy optimized geometry of **H<sub>4</sub>LYF** (*bottom-left*); the isosurfaces (*isovalue* = 0.02; the green and brown coloured surfaces representing the mutually opposite phases of the corresponding wave function) corresponding to the HOMO (*top-right*) and LUMO (*bottom-right*) in the optimized geometry of **H<sub>4</sub>LYF**.

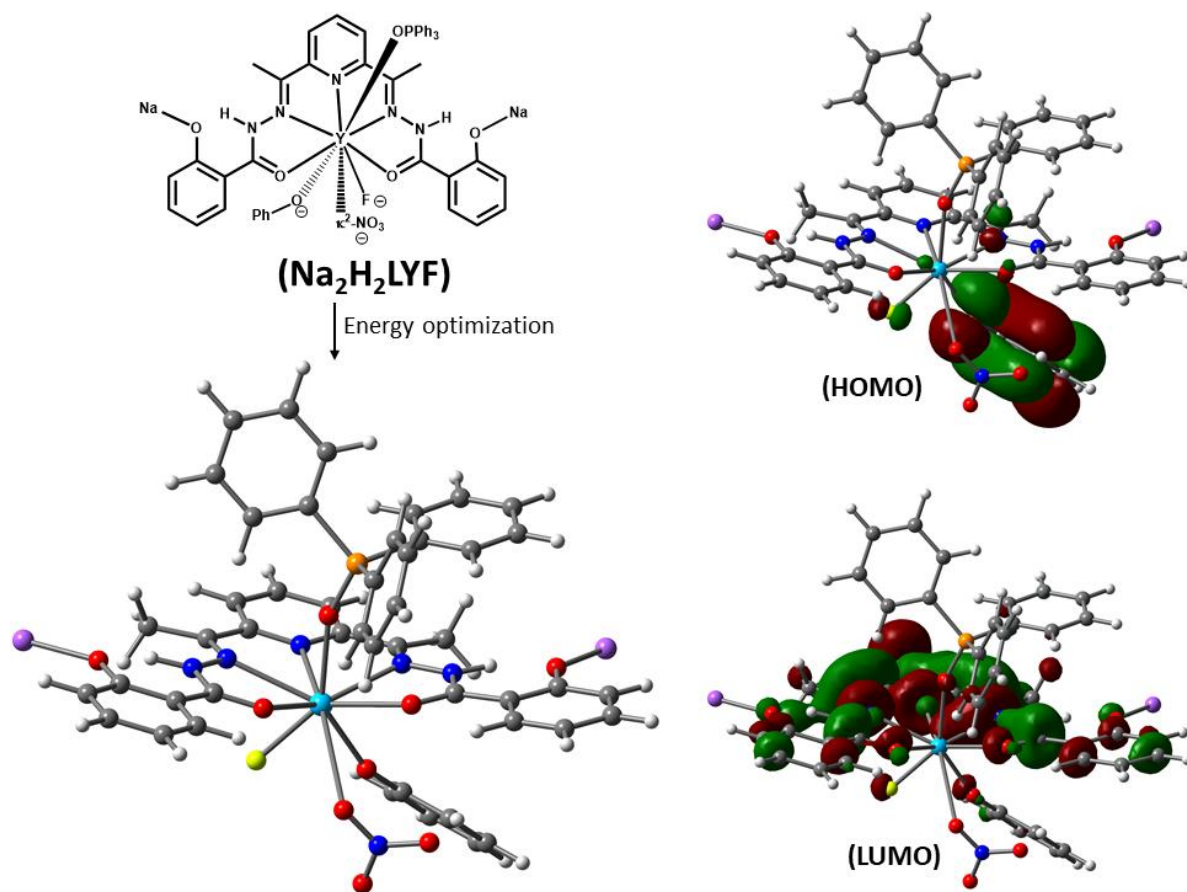

**Chart S12:** Schematic structures of the hypothetical monomeric model complex  $\text{Na}_2\text{H}_2\text{LYF}$  (*top-left*), representing the building units of the fluorinated congener of the 1D coordination polymer  $\mathbf{1}\cdot\mathbf{Y}$ , which were used for the initial guesses for the gas-phase energy optimization; the gas-phase energy optimized geometry of  $\text{Na}_2\text{H}_2\text{LYF}$  (*bottom-left*); the isosurfaces (*isovalue* = 0.02; the green and brown coloured surfaces representing the mutually opposite phases of the corresponding wave function) corresponding to the HOMO (*top-right*) and LUMO (*bottom-right*) in the optimized geometry of  $\text{Na}_2\text{H}_2\text{LYF}$ .

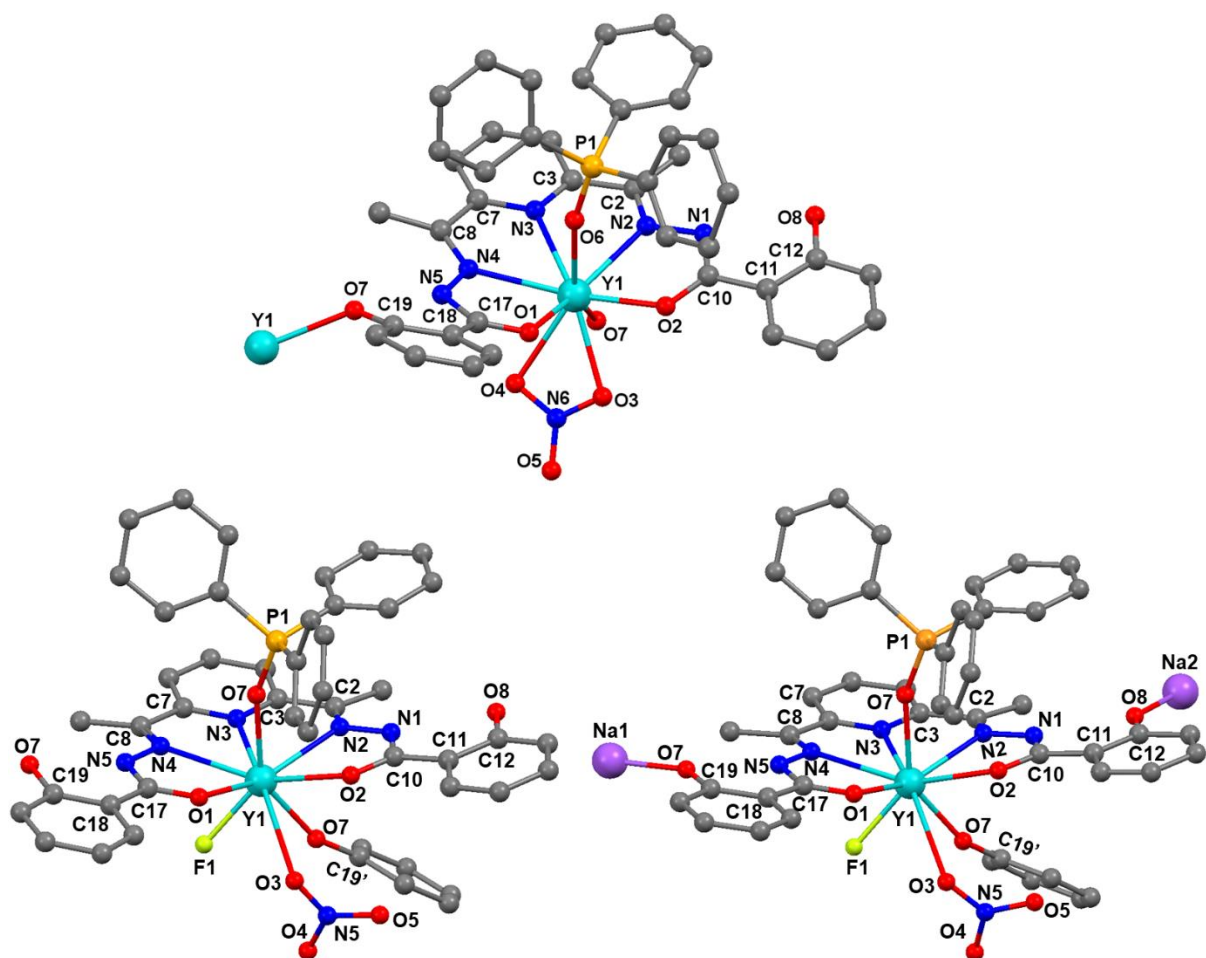

**Figure S35:** The *ball-and-sticks* representations for the repeat unit of the solid-state single crystal X-ray molecular structure of **1.Y** (*top*), the energy-optimized geometries of the hypothetical monomeric model complexes **H<sub>4</sub>LYF** (*left, bottom*) and **Na<sub>2</sub>H<sub>2</sub>LYF** (*right, bottom*) representing the fluorinated congener of the 1D CP **1.Y**. The selective atoms are labelled. The H atoms are omitted for clarity. Colour codes: C, grey; N, blue; O, red; F, fluorescent green; P, orange; Na, purple; and Y, cyan. The atomic labels are in accordance with characteristic bond parameters provided in Table S8 below.

**Table S8:** The characteristic bond parameters associated with the 1D CP **1.Y** and the hypothetical monomeric model complexes **H<sub>4</sub>LYF**, and **Na<sub>2</sub>H<sub>2</sub>LYF** representing the fluorinated congener of the 1D CP **1.Y**. The atomic labels are in accordance with labels as portrayed Figure 35 above.

| Bond parameter                                                    | 1·Y    | H <sub>4</sub> LYF | Na <sub>2</sub> H <sub>2</sub> LYF |
|-------------------------------------------------------------------|--------|--------------------|------------------------------------|
| Y1-O1 (Å)                                                         | 2.391  | 2.495              | 2.477                              |
| Y1-O2 (Å)                                                         | 2.263  | 2.504              | 2.519                              |
| Y1-O3 (Å)                                                         | 2.431  | 3.718              | 3.517                              |
| Y1-O4 (Å)                                                         | 2.542  | -                  | -                                  |
| Y1-O6 (Å)                                                         | 2.357  | 2.381              | 2.413                              |
| Y1-O7 (Å)                                                         | 2.356  | 2.249              | 2.257                              |
| Y1-N2 (Å)                                                         | 2.472  | 2.588              | 2.578                              |
| Y1-N3 (Å)                                                         | 2.512  | 2.576              | 2.584                              |
| Y1-N4 (Å)                                                         | 2.535  | 2.605              | 2.592                              |
| O1-C17 (Å)                                                        | 1.248  | 1.276              | 1.285                              |
| O2-C10 (Å)                                                        | 1.278  | 1.277              | 1.284                              |
| N1-O8 (Å)                                                         | 2.594  | 2.618              | 2.576                              |
| N5-O7 (Å)                                                         | 2.605  | 2.619              | 2.579                              |
| Y1-F1 (Å)                                                         | -      | 2.193              | 2.199                              |
| Na1-O7 (Å)                                                        | -      | -                  | 2.158                              |
| Na2-O8 (Å)                                                        | -      | -                  | 2.155                              |
| Y1-O6-P1 (°)                                                      | 160.1  | 159.2              | 158.3                              |
| Y1-O7-C19/19' (°)                                                 | 131.0  | 159.0              | 159.5                              |
| O1-C17-N5-N4 (°)                                                  | 11.863 | 1.398              | 2.018                              |
| O2-C10-N1-N2 (°)                                                  | 2.472  | 3.084              | 3.144                              |
| Py <sub>(centroid)</sub> – Ph <sub>(bridging, centroid)</sub> (Å) | 3.589  | 6.386              | 6.177                              |

**Table S9:** The coordinates of the energy-optimized geometries

**c1:**

|   |         |         |         |   |          |         |         |
|---|---------|---------|---------|---|----------|---------|---------|
| N | 0.0000  | 0.1092  | 0.0000  | O | -5.9115  | -1.7476 | 0.0000  |
| N | -4.7214 | 0.2188  | 0.0000  | N | -3.5238  | -0.4558 | 0.0000  |
| C | -7.1694 | 0.2900  | 0.0000  | C | -7.2246  | 1.7018  | 0.0000  |
| C | -1.1705 | -0.5730 | 0.0000  | C | -5.9100  | -0.4856 | 0.0000  |
| C | -2.4179 | 0.2291  | 0.0000  | C | -1.2056  | -1.9765 | 0.0000  |
| H | -2.1605 | -2.4781 | 0.0000  | C | -8.4002  | -0.4227 | 0.0000  |
| C | -9.6184 | 0.2743  | 0.0000  | H | -10.5271 | -0.3090 | -0.0001 |
| C | -8.4318 | 2.3845  | 0.0000  | H | -8.4438  | 3.4651  | 0.0000  |
| C | -9.6354 | 1.6599  | -0.0001 | H | -10.5813 | 2.1845  | -0.0001 |
| C | -2.3427 | 1.7330  | 0.0000  | H | -1.3036  | 2.0418  | 0.0001  |
| H | -2.8247 | 2.1591  | -0.8860 | H | -2.8249  | 2.1591  | 0.8859  |
| C | -0.0000 | -2.6747 | 0.0000  | H | -0.0000  | -3.7559 | 0.0000  |
| O | 5.9115  | -1.7476 | -0.0001 | N | 4.7214   | 0.2188  | 0.0000  |
| N | 3.5238  | -0.4558 | 0.0000  | C | 7.1694   | 0.2900  | 0.0000  |
| C | 7.2246  | 1.7018  | 0.0000  | C | 1.1705   | -0.5730 | 0.0000  |
| C | 5.9100  | -0.4856 | 0.0000  | C | 2.4179   | 0.2291  | 0.0000  |
| C | 1.2056  | -1.9765 | 0.0000  | H | 2.1605   | -2.4781 | 0.0000  |
| C | 8.4002  | -0.4227 | 0.0000  | C | 9.6184   | 0.2743  | 0.0000  |
| H | 10.5271 | -0.3090 | 0.0001  | C | 8.4318   | 2.3845  | 0.0001  |
| H | 8.4438  | 3.4651  | 0.0001  | C | 9.6354   | 1.6599  | 0.0001  |

|   |         |         |         |   |        |         |         |
|---|---------|---------|---------|---|--------|---------|---------|
| H | 10.5813 | 2.1845  | 0.0001  | C | 2.3427 | 1.7330  | 0.0000  |
| H | 1.3036  | 2.0418  | -0.0001 | H | 2.8249 | 2.1591  | -0.8859 |
| H | 2.8247  | 2.1591  | 0.8860  | H | 4.7340 | 1.2279  | 0.0000  |
| H | -4.7340 | 1.2279  | 0.0000  | H | 6.3145 | 2.2879  | 0.0000  |
| H | -6.3144 | 2.2879  | 0.0000  | O | 8.4728 | -1.7877 | 0.0000  |
| O | -8.4727 | -1.7877 | 0.0000  | H | 7.5522 | -2.1669 | -0.0001 |
| H | -7.5521 | -2.1669 | 0.0001  |   |        |         |         |

**C<sub>2</sub>:**

|   |         |         |         |   |          |         |         |
|---|---------|---------|---------|---|----------|---------|---------|
| N | 0.0000  | 0.0948  | 0.0000  | O | -5.9203  | -1.7567 | -0.1173 |
| N | -4.7218 | 0.2032  | 0.0358  | N | -3.5236  | -0.4703 | 0.0271  |
| C | -7.1626 | 0.2803  | 0.0852  | C | -7.2096  | 1.6465  | 0.4400  |
| C | -1.1705 | -0.5874 | 0.0049  | C | -5.9108  | -0.5015 | 0.0053  |
| C | -2.4179 | 0.2147  | 0.0097  | C | -1.2056  | -1.9908 | 0.0044  |
| H | -2.1604 | -2.4925 | 0.0069  | C | -8.3883  | -0.3768 | -0.2063 |
| C | -9.5930 | 0.3419  | -0.1883 | H | -10.4994 | -0.1943 | -0.4268 |
| C | -8.4058 | 2.3487  | 0.4686  | H | -8.4162  | 3.3920  | 0.7500  |
| C | -9.6019 | 1.6887  | 0.1411  | H | -10.5386 | 2.2295  | 0.1578  |
| C | -2.3432 | 1.7184  | -0.0033 | H | -1.3042  | 2.0277  | -0.0121 |
| H | -2.8314 | 2.1376  | -0.8891 | H | -2.8201  | 2.1510  | 0.8824  |
| C | -0.0000 | -2.6891 | 0.0001  | H | -0.0000  | -3.7703 | 0.0001  |
| O | 5.9202  | -1.7567 | 0.1173  | N | 4.7218   | 0.2031  | -0.0359 |
| N | 3.5236  | -0.4703 | -0.0271 | C | 7.1626   | 0.2803  | -0.0852 |
| C | 7.2096  | 1.6465  | -0.4399 | C | 1.1705   | -0.5874 | -0.0049 |
| C | 5.9107  | -0.5015 | -0.0053 | C | 2.4179   | 0.2147  | -0.0098 |
| C | 1.2056  | -1.9908 | -0.0043 | H | 2.1604   | -2.4925 | -0.0068 |
| C | 8.3883  | -0.3768 | 0.2063  | C | 9.5930   | 0.3419  | 0.1883  |
| H | 10.4994 | -0.1944 | 0.4267  | C | 8.4058   | 2.3487  | -0.4685 |
| H | 8.4162  | 3.3921  | -0.7498 | C | 9.6019   | 1.6887  | -0.1411 |
| H | 10.5386 | 2.2295  | -0.1577 | C | 2.3432   | 1.7184  | 0.0031  |
| H | 1.3042  | 2.0277  | 0.0119  | H | 2.8201   | 2.1510  | -0.8826 |
| H | 2.8314  | 2.1377  | 0.8889  | H | 4.7403   | 1.2125  | -0.0062 |
| H | -4.7403 | 1.2125  | 0.0061  | H | 6.3042   | 2.1649  | -0.7289 |
| H | -6.3042 | 2.1648  | 0.7291  | O | 8.4659   | -1.7076 | 0.5125  |
| O | -8.4658 | -1.7076 | -0.5126 | H | 7.5646   | -2.1196 | 0.4304  |
| H | -7.5646 | -2.1196 | -0.4304 |   |          |         |         |

**C<sub>3</sub>:**

|   |         |         |         |   |         |         |         |
|---|---------|---------|---------|---|---------|---------|---------|
| N | 0.0000  | 0.1529  | 0.0000  | O | 5.7628  | 1.9741  | 0.0003  |
| N | 4.7110  | -0.1211 | -0.0001 | N | 3.5426  | 0.6635  | 0.0000  |
| C | 7.1220  | -0.0045 | 0.0000  | C | 7.2530  | -1.4202 | -0.0004 |
| C | 1.1736  | 0.8290  | -0.0001 | C | 5.8122  | 0.6115  | 0.0000  |
| C | 2.4134  | 0.0122  | -0.0001 | C | 1.2041  | 2.2331  | -0.0001 |
| H | 2.1518  | 2.7458  | -0.0001 | C | 8.2880  | 0.7915  | 0.0004  |
| C | 9.5455  | 0.2081  | 0.0004  | H | 10.4315 | 0.8270  | 0.0007  |
| C | 8.5294  | -1.9984 | -0.0003 | H | 8.5955  | -3.0762 | -0.0006 |
| C | 9.6608  | -1.1934 | 0.0001  | H | 10.6403 | -1.6529 | 0.0001  |
| C | 2.3252  | -1.4859 | -0.0002 | H | 1.2899  | -1.8042 | 0.0000  |
| H | 2.8312  | -1.8973 | -0.8763 | H | 2.8315  | -1.8974 | 0.8757  |
| C | 0.0000  | 2.9327  | -0.0001 | H | 0.0000  | 4.0140  | -0.0001 |
| O | -5.7628 | 1.9741  | -0.0004 | N | -4.7110 | -0.1212 | 0.0001  |
| N | -3.5425 | 0.6635  | 0.0000  | C | -7.1220 | -0.0045 | 0.0000  |
| C | -7.2530 | -1.4202 | 0.0003  | C | -1.1736 | 0.8290  | 0.0000  |
| C | -5.8122 | 0.6115  | -0.0001 | C | -2.4134 | 0.0122  | 0.0001  |
| C | -1.2041 | 2.2331  | 0.0000  | H | -2.1518 | 2.7458  | 0.0000  |



|   |          |         |         |   |         |         |         |
|---|----------|---------|---------|---|---------|---------|---------|
| C | -8.2880  | 0.7916  | -0.0002 | C | -9.5455 | 0.2081  | -0.0001 |
| H | -10.4315 | 0.8270  | -0.0003 | C | -8.5294 | -1.9984 | 0.0004  |
| H | -8.5955  | -3.0762 | 0.0006  | C | -9.6608 | -1.1934 | 0.0002  |
| H | -10.6403 | -1.6528 | 0.0002  | C | -2.3252 | -1.4859 | 0.0002  |
| H | -1.2898  | -1.8042 | 0.0001  | H | -2.8315 | -1.8975 | -0.8756 |
| H | -2.8311  | -1.8973 | 0.8764  | O | 6.1712  | -2.2573 | -0.0008 |
| O | -6.1712  | -2.2574 | 0.0006  | H | 8.1754  | 1.8654  | 0.0006  |
| H | -8.1753  | 1.8655  | -0.0005 | H | -5.3297 | -1.7087 | 0.0005  |
| H | 5.3297   | -1.7087 | -0.0009 | H | -4.8109 | 2.2293  | -0.0004 |
| H | 4.8109   | 2.2293  | 0.0003  |   |         |         |         |

**C<sub>4</sub>:**

|   |         |         |         |   |          |         |         |
|---|---------|---------|---------|---|----------|---------|---------|
| N | 0.0000  | 0.1706  | -0.0001 | O | -5.6741  | -1.5782 | 0.3860  |
| N | -4.7026 | 0.4739  | -0.1905 | N | -3.5353  | -0.3205 | -0.0685 |
| C | -7.1255 | 0.3026  | -0.0290 | C | -7.2991  | 1.6620  | -0.3756 |
| C | -1.1689 | -0.5063 | -0.0989 | C | -5.7768  | -0.2378 | 0.0445  |
| C | -2.4035 | 0.3116  | -0.1989 | C | -1.1994  | -1.9104 | -0.1070 |
| H | -2.1429 | -2.4229 | -0.2008 | C | -8.2774  | -0.4812 | 0.2343  |
| C | -9.5504 | 0.0988  | 0.1472  | H | -10.4025 | -0.5311 | 0.3553  |
| C | -8.5611 | 2.2267  | -0.4592 | H | -8.6733  | 3.2680  | -0.7258 |
| C | -9.6927 | 1.4359  | -0.1951 | H | -10.6824 | 1.8684  | -0.2578 |
| C | -2.3062 | 1.7901  | -0.4355 | H | -1.2776  | 2.0813  | -0.6136 |
| H | -2.9353 | 2.0745  | -1.2791 | H | -2.6883  | 2.3374  | 0.4291  |
| C | -0.0000 | -2.6105 | -0.0001 | H | -0.0000  | -3.6918 | -0.0001 |
| O | 5.6742  | -1.5782 | -0.3864 | N | 4.7026   | 0.4738  | 0.1903  |
| N | 3.5352  | -0.3206 | 0.0678  | C | 7.1255   | 0.3026  | 0.0289  |
| C | 7.2989  | 1.6621  | 0.3751  | C | 1.1688   | -0.5063 | 0.0986  |
| C | 5.7768  | -0.2379 | -0.0447 | C | 2.4035   | 0.3115  | 0.1987  |
| C | 1.1993  | -1.9104 | 0.1068  | H | 2.1428   | -2.4229 | 0.2005  |
| C | 8.2775  | -0.4813 | -0.2338 | C | 9.5505   | 0.0989  | -0.1467 |
| H | 10.4026 | -0.5311 | -0.3543 | C | 8.5609   | 2.2269  | 0.4587  |
| H | 8.6730  | 3.2683  | 0.7249  | C | 9.6926   | 1.4361  | 0.1952  |
| H | 10.6822 | 1.8686  | 0.2580  | C | 2.3064   | 1.7898  | 0.4364  |
| H | 1.2769  | 2.0821  | 0.6070  | H | 2.6967   | 2.3378  | -0.4241 |
| H | 2.9289  | 2.0723  | 1.2857  | H | 6.4127   | 2.2468  | 0.5719  |
| H | -6.4129 | 2.2467  | -0.5729 | O | 8.2434   | -1.8136 | -0.5801 |
| O | -8.2432 | -1.8134 | 0.5811  | H | 7.3202   | -2.1436 | -0.6190 |
| H | -7.3200 | -2.1433 | 0.6197  | H | 4.7076   | -1.7898 | -0.3869 |
| H | -4.7075 | -1.7898 | 0.3860  |   |          |         |         |

**C<sub>5</sub>:**

|   |         |        |         |   |         |         |         |
|---|---------|--------|---------|---|---------|---------|---------|
| N | 18.8544 | 3.0409 | 1.9232  | O | 16.0536 | 6.0056  | -0.9052 |
| N | 15.2818 | 4.8891 | 0.9597  | N | 16.4281 | 4.1374  | 1.0705  |
| C | 13.9729 | 6.7326 | 0.0349  | C | 13.0782 | 6.7735  | 1.1274  |
| C | 17.6866 | 2.3657 | 2.0304  | C | 15.1790 | 5.8755  | -0.0076 |
| C | 16.4256 | 3.1434 | 1.9092  | C | 17.6517 | 0.9761  | 2.2564  |
| H | 16.7077 | 0.4481 | 2.3238  | C | 13.7021 | 7.5656  | -1.0875 |
| C | 12.5397 | 8.3558 | -1.1115 | H | 12.3643 | 8.9659  | -1.9892 |
| C | 11.9373 | 7.5675 | 1.1034  | H | 11.2690 | 7.5877  | 1.9569  |
| C | 11.6661 | 8.3535 | -0.0316 | H | 10.7760 | 8.9738  | -0.0598 |
| C | 15.2276 | 2.7539 | 2.7527  | H | 15.4631 | 1.9286  | 3.4251  |
| H | 14.9056 | 3.5927 | 3.3872  | H | 14.3689 | 2.4527  | 2.1363  |
| C | 18.8558 | 0.2793 | 2.3624  | H | 18.8563 | -0.7947 | 2.5155  |
| O | 21.6640 | 5.9833 | -0.9294 | N | 22.4265 | 4.8879  | 0.9517  |
| N | 21.2813 | 4.1342 | 1.0628  | C | 23.7341 | 6.7286  | 0.0199  |

|   |         |        |         |   |         |        |         |
|---|---------|--------|---------|---|---------|--------|---------|
| C | 24.6194 | 6.7846 | 1.1194  | C | 20.0226 | 2.3668 | 2.0301  |
| C | 22.5322 | 5.8658 | -0.0239 | C | 21.2829 | 3.1456 | 1.9078  |
| C | 20.0592 | 0.9774 | 2.2565  | H | 21.0039 | 0.4506 | 2.3243  |
| C | 24.0107 | 7.5514 | -1.1086 | C | 25.1700 | 8.3462 | -1.1310 |
| H | 25.3501 | 8.9482 | -2.0134 | C | 25.7571 | 7.5832 | 1.0968  |
| H | 26.4180 | 7.6151 | 1.9557  | C | 26.0345 | 8.3586 | -0.0439 |
| H | 26.9221 | 8.9825 | -0.0711 | C | 22.4787 | 2.7631 | 2.7576  |
| H | 22.2440 | 1.9375 | 3.4298  | H | 22.7936 | 3.6042 | 3.3925  |
| H | 23.3418 | 2.4654 | 2.1455  | H | 23.2209 | 4.7133 | 1.5547  |
| H | 14.4840 | 4.7063 | 1.5558  | O | 14.5283 | 7.6415 | -2.1710 |
| O | 23.1931 | 7.6127 | -2.1995 | H | 13.2921 | 6.2045 | 2.0275  |
| H | 24.4000 | 6.2240 | 2.0235  | H | 15.3453 | 7.0876 | -1.9997 |
| H | 22.3768 | 7.0575 | -2.0290 |   |         |        |         |

**C<sub>6</sub>:**

|   |         |        |         |   |         |         |         |
|---|---------|--------|---------|---|---------|---------|---------|
| N | 18.8560 | 3.1180 | 1.8892  | O | 15.9877 | 6.1312  | -0.9158 |
| N | 15.2264 | 4.8877 | 0.8867  | N | 16.3940 | 4.1714  | 1.0025  |
| C | 13.7974 | 6.6280 | -0.0909 | C | 12.6940 | 6.4361  | 0.7642  |
| C | 17.6872 | 2.4457 | 2.0151  | C | 15.1017 | 5.8696  | -0.0828 |
| C | 16.4213 | 3.2130 | 1.8825  | C | 17.6529 | 1.0617  | 2.2764  |
| H | 16.7075 | 0.5378 | 2.3582  | C | 13.6889 | 7.6340  | -1.0685 |
| C | 12.5435 | 8.4178 | -1.1968 | H | 12.4936 | 9.1854  | -1.9609 |
| C | 11.5383 | 7.2154 | 0.6453  | H | 10.7021 | 7.0441  | 1.3188  |
| C | 11.4613 | 8.2071 | -0.3343 | H | 10.5619 | 8.8079  | -0.4202 |
| C | 15.2408 | 2.8488 | 2.7628  | H | 15.4933 | 2.0529  | 3.4642  |
| H | 14.9213 | 3.7147 | 3.3598  | H | 14.3734 | 2.5232  | 2.1714  |
| C | 18.8560 | 0.3666 | 2.3993  | H | 18.8560 | -0.7036 | 2.5788  |
| O | 21.7241 | 6.1315 | -0.9155 | N | 22.4856 | 4.8878  | 0.8867  |
| N | 21.3179 | 4.1714 | 1.0025  | C | 23.9146 | 6.6280  | -0.0909 |
| C | 25.0181 | 6.4360 | 0.7640  | C | 20.0248 | 2.4457  | 2.0151  |
| C | 22.6102 | 5.8697 | -0.0827 | C | 21.2907 | 3.2130  | 1.8825  |
| C | 20.0591 | 1.0617 | 2.2763  | H | 21.0044 | 0.5378  | 2.3581  |
| C | 24.0230 | 7.6341 | -1.0684 | C | 25.1684 | 8.4179  | -1.1967 |
| H | 25.2183 | 9.1855 | -1.9608 | C | 26.1738 | 7.2152  | 0.6451  |
| H | 27.0101 | 7.0437 | 1.3185  | C | 26.2508 | 8.2070  | -0.3344 |
| H | 27.1502 | 8.8078 | -0.4204 | C | 22.4713 | 2.8487  | 2.7626  |
| H | 22.2188 | 2.0528 | 3.4641  | H | 22.7909 | 3.7146  | 3.3596  |
| H | 23.3386 | 2.5230 | 2.1712  | H | 23.2773 | 4.7322  | 1.5060  |
| H | 14.4347 | 4.7323 | 1.5061  | O | 12.7637 | 5.4382  | 1.7501  |
| H | 11.9498 | 5.3953 | 2.2853  | O | 24.9484 | 5.4380  | 1.7498  |
| H | 25.7624 | 5.3950 | 2.2850  | H | 14.5444 | 7.7699  | -1.7198 |
| H | 23.1674 | 7.7702 | -1.7196 |   |         |         |         |

**C<sub>7</sub>:**

|   |         |         |         |   |         |         |         |
|---|---------|---------|---------|---|---------|---------|---------|
| N | -0.0005 | 2.8386  | -0.0002 | O | 1.9391  | -0.8891 | 0.6215  |
| N | 3.4880  | 0.6631  | -0.1879 | N | 2.3300  | 1.4582  | -0.0412 |
| C | 4.1754  | -1.6532 | 0.1443  | C | 5.4891  | -1.3889 | -0.3052 |
| C | 1.1584  | 3.5147  | -0.1693 | C | 3.2074  | -0.5694 | 0.1762  |
| C | 2.4048  | 2.7198  | -0.3308 | C | 1.1892  | 4.9213  | -0.1819 |
| H | 2.1182  | 5.4530  | -0.3180 | C | 3.8502  | -2.9725 | 0.5509  |
| C | 4.8268  | -3.9774 | 0.5000  | H | 4.5407  | -4.9691 | 0.8174  |
| C | 6.4472  | -2.3882 | -0.3517 | H | 7.4466  | -2.1670 | -0.6985 |
| C | 6.1091  | -3.6908 | 0.0548  | H | 6.8506  | -4.4779 | 0.0215  |
| C | 3.6666  | 3.3945  | -0.7987 | H | 4.0534  | 4.0778  | -0.0372 |
| H | 4.4270  | 2.6465  | -0.9971 | H | 3.4902  | 3.9782  | -1.7043 |
| C | -0.0005 | 5.6226  | 0.0003  | H | -0.0005 | 6.7039  | 0.0004  |

|   |         |         |         |   |         |         |         |
|---|---------|---------|---------|---|---------|---------|---------|
| O | -1.9387 | -0.8893 | -0.6205 | N | -3.4884 | 0.6627  | 0.1879  |
| N | -2.3306 | 1.4579  | 0.0414  | C | -4.1750 | -1.6539 | -0.1442 |
| C | -5.4889 | -1.3901 | 0.3049  | C | -1.1594 | 3.5146  | 0.1693  |
| C | -3.2073 | -0.5698 | -0.1758 | C | -2.4057 | 2.7196  | 0.3306  |
| C | -1.1902 | 4.9211  | 0.1823  | H | -2.1192 | 5.4528  | 0.3185  |
| C | -3.8493 | -2.9731 | -0.5508 | C | -4.8255 | -3.9783 | -0.5002 |
| H | -4.5390 | -4.9700 | -0.8175 | C | -6.4466 | -2.3897 | 0.3510  |
| H | -7.4463 | -2.1688 | 0.6977  | C | -6.1080 | -3.6922 | -0.0554 |
| H | -6.8493 | -4.4795 | -0.0223 | C | -3.6678 | 3.3942  | 0.7979  |
| H | -3.4919 | 3.9787  | 1.7030  | H | -4.4279 | 2.6460  | 0.9968  |
| H | -4.0548 | 4.0766  | 0.0356  | O | 2.6114  | -3.3556 | 1.0083  |
| O | -2.6101 | -3.3558 | -1.0078 | H | 5.7217  | -0.3800 | -0.6116 |
| H | -5.7219 | -0.3812 | 0.6113  | H | 1.9852  | -2.5988 | 1.0095  |
| H | -1.9842 | -2.5987 | -1.0088 | H | 1.4170  | -0.0388 | 0.5790  |
| H | -1.4169 | -0.0386 | -0.5780 |   |         |         |         |

**C<sub>8</sub>:**

|   |         |         |         |   |         |         |         |
|---|---------|---------|---------|---|---------|---------|---------|
| N | 0.0000  | 2.5383  | 0.0001  | O | 2.0562  | -1.1985 | -0.7868 |
| N | 3.5170  | 0.4067  | 0.0854  | N | 2.3604  | 1.1941  | -0.0441 |
| C | 4.3190  | -1.8416 | -0.3089 | C | 5.6330  | -1.5182 | 0.1253  |
| C | 1.1535  | 3.2156  | 0.1981  | C | 3.2809  | -0.8329 | -0.3283 |
| C | 2.3953  | 2.4186  | 0.3809  | C | 1.1853  | 4.6216  | 0.2085  |
| H | 2.1130  | 5.1530  | 0.3568  | C | 4.0377  | -3.1629 | -0.7176 |
| C | 5.0245  | -4.1367 | -0.6983 | H | 4.7983  | -5.1457 | -1.0125 |
| C | 6.6225  | -2.5098 | 0.1396  | H | 7.6113  | -2.2327 | 0.4737  |
| C | 6.3203  | -3.8033 | -0.2662 | H | 7.0935  | -4.5600 | -0.2493 |
| C | 3.6077  | 3.0486  | 1.0162  | H | 3.3294  | 3.8075  | 1.7457  |
| H | 4.2042  | 2.2903  | 1.5172  | H | 4.2489  | 3.5208  | 0.2655  |
| C | 0.0001  | 5.3234  | -0.0002 | H | 0.0001  | 6.4047  | -0.0003 |
| O | -2.0562 | -1.1985 | 0.7869  | N | -3.5170 | 0.4067  | -0.0853 |
| N | -2.3604 | 1.1941  | 0.0443  | C | -4.3190 | -1.8416 | 0.3089  |
| C | -5.6329 | -1.5183 | -0.1254 | C | -1.1535 | 3.2156  | -0.1981 |
| C | -3.2809 | -0.8329 | 0.3284  | C | -2.3954 | 2.4187  | -0.3808 |
| C | -1.1852 | 4.6217  | -0.2088 | H | -2.1128 | 5.1531  | -0.3571 |
| C | -4.0377 | -3.1629 | 0.7176  | C | -5.0245 | -4.1367 | 0.6983  |
| H | -4.7983 | -5.1457 | 1.0126  | C | -6.6225 | -2.5099 | -0.1397 |
| H | -7.6113 | -2.2328 | -0.4740 | C | -6.3203 | -3.8033 | 0.2661  |
| H | -7.0934 | -4.5601 | 0.2491  | C | -3.6078 | 3.0487  | -1.0159 |
| H | -4.2490 | 3.5209  | -0.2651 | H | -4.2043 | 2.2904  | -1.5168 |
| H | -3.3297 | 3.8076  | -1.7454 | H | -5.1798 | 0.3424  | -0.4634 |
| H | 5.1798  | 0.3425  | 0.4632  | O | 5.9826  | -0.2573 | 0.5280  |
| O | -5.9826 | -0.2574 | -0.5282 | H | 3.0349  | -3.3942 | -1.0445 |
| H | -3.0349 | -3.3942 | 1.0446  | H | 1.4798  | -0.3917 | -0.7396 |
| H | -1.4799 | -0.3917 | 0.7398  |   |         |         |         |

**H<sub>2</sub>L<sup>2-</sup>:**

|   |        |         |         |   |         |         |         |
|---|--------|---------|---------|---|---------|---------|---------|
| N | 0.0000 | 0.2419  | 0.0000  | O | 6.0102  | 2.1022  | 0.0001  |
| N | 4.7269 | 0.1551  | 0.0000  | N | 3.5387  | 0.8244  | 0.0000  |
| C | 7.1263 | -0.0398 | 0.0000  | C | 7.0391  | -1.4871 | -0.0001 |
| C | 1.1771 | 0.9227  | 0.0000  | C | 5.9364  | 0.8455  | 0.0000  |
| C | 2.4302 | 0.1321  | 0.0000  | C | 1.2075  | 2.3291  | 0.0000  |
| H | 2.1662 | 2.8240  | 0.0000  | C | 8.3858  | 0.5865  | 0.0001  |
| C | 9.5739 | -0.1345 | 0.0001  | H | 10.5307 | 0.3747  | 0.0001  |
| C | 8.2881 | -2.1956 | -0.0001 | H | 8.2218  | -3.2769 | -0.0002 |
| C | 9.5081 | -1.5445 | 0.0000  | H | 10.4262 | -2.1264 | 0.0000  |
| C | 2.3807 | -1.3720 | 0.0000  | H | 1.3492  | -1.7081 | 0.0004  |

|   |          |         |         |   |         |         |         |
|---|----------|---------|---------|---|---------|---------|---------|
| H | 2.8949   | -1.7834 | -0.8743 | H | 2.8957  | -1.7834 | 0.8738  |
| C | 0.0000   | 3.0240  | 0.0000  | H | 0.0000  | 4.1076  | 0.0000  |
| O | -6.0102  | 2.1022  | -0.0002 | N | -4.7269 | 0.1551  | 0.0000  |
| N | -3.5387  | 0.8244  | 0.0000  | C | -7.1263 | -0.0398 | 0.0000  |
| C | -7.0391  | -1.4871 | 0.0001  | C | -1.1771 | 0.9227  | 0.0000  |
| C | -5.9364  | 0.8455  | 0.0000  | C | -2.4302 | 0.1321  | 0.0000  |
| C | -1.2075  | 2.3291  | 0.0000  | H | -2.1662 | 2.8240  | 0.0000  |
| C | -8.3858  | 0.5865  | -0.0001 | C | -9.5739 | -0.1345 | 0.0000  |
| H | -10.5307 | 0.3747  | -0.0001 | C | -8.2881 | -2.1956 | 0.0001  |
| H | -8.2218  | -3.2769 | 0.0002  | C | -9.5081 | -1.5445 | 0.0001  |
| H | -10.4262 | -2.1264 | 0.0001  | C | -2.3807 | -1.3720 | 0.0000  |
| H | -1.3492  | -1.7081 | -0.0005 | H | -2.8958 | -1.7834 | -0.8738 |
| H | -2.8948  | -1.7834 | 0.8743  | O | 5.9037  | -2.1505 | -0.0002 |
| O | -5.9037  | -2.1505 | 0.0002  | H | 8.3885  | 1.6695  | 0.0001  |
| H | -8.3885  | 1.6695  | -0.0001 | H | -4.8322 | -0.8868 | 0.0002  |
| H | 4.8322   | -0.8868 | -0.0001 |   |         |         |         |

#### H<sub>4</sub>LYF:

|   |         |         |         |   |         |         |         |
|---|---------|---------|---------|---|---------|---------|---------|
| P | 0.9737  | 2.4062  | -0.2576 | O | -1.5128 | -0.3433 | -1.1456 |
| N | 0.1456  | -0.6028 | 3.0015  | O | 2.0586  | -1.6445 | -0.9071 |
| O | 0.9084  | 0.8496  | 0.2206  | O | 6.0092  | -1.9974 | 0.5016  |
| N | 3.4511  | -1.6210 | 0.9190  | H | 4.4050  | -1.7360 | 1.2792  |
| O | -0.1650 | -2.7334 | -2.9054 | C | 2.5182  | 3.1851  | 0.4358  |
| N | -1.9054 | 0.0912  | 1.4430  | C | 4.1145  | -2.4032 | -2.6581 |
| H | 3.0869  | -2.3281 | -2.9995 | N | -2.8729 | 0.4466  | 0.5244  |
| C | 1.2351  | 3.7729  | -2.7419 | H | 1.2892  | 4.6864  | -2.1554 |
| C | -0.9716 | -0.0916 | 3.5977  | C | 4.3855  | -2.1419 | -1.2917 |
| C | -2.6027 | 0.2269  | -0.8037 | C | 3.2325  | -1.7851 | -0.4266 |
| C | 3.7710  | -1.5857 | 3.7487  | H | 3.5665  | -1.9028 | 4.7727  |
| H | 4.2989  | -2.4113 | 3.2574  | H | 4.4529  | -0.7241 | 3.7900  |
| C | 3.6080  | 2.3469  | 0.7471  | H | 3.5261  | 1.2717  | 0.6164  |
| C | -2.1402 | 0.2098  | 2.7260  | C | -0.9956 | 0.2152  | 4.9754  |
| H | -1.8846 | 0.6243  | 5.4383  | C | 1.2842  | -0.7807 | 3.7359  |
| C | 5.7299  | -2.2506 | -0.8451 | N | 2.3730  | -1.2748 | 1.7086  |
| C | -3.5979 | 0.6663  | -1.8135 | O | -5.1052 | 1.6213  | -0.1757 |
| C | 1.3187  | -0.4872 | 5.1164  | H | 2.2253  | -0.6220 | 5.6921  |
| C | 1.0655  | 2.5204  | -2.1141 | C | -4.8114 | 1.3415  | -1.5137 |
| C | 5.1350  | -2.7545 | -3.5501 | H | 4.9036  | -2.9528 | -4.5923 |
| C | 0.1614  | 0.0035  | 5.7385  | H | 0.1675  | 0.2347  | 6.7994  |
| C | 1.2752  | 2.6616  | -4.9147 | H | 1.3554  | 2.7160  | -5.9977 |
| C | 1.3379  | 3.8406  | -4.1431 | H | 1.4675  | 4.8048  | -4.6279 |
| C | 3.8217  | 5.1376  | 1.0866  | H | 3.9016  | 6.2137  | 1.2178  |
| C | -5.3833 | 1.4379  | -3.8753 | H | -6.0723 | 1.7364  | -4.6612 |
| C | -3.4406 | 0.6740  | 3.3340  | H | -3.6336 | 0.1618  | 4.2804  |
| H | -3.4113 | 1.7542  | 3.5361  | H | -4.2952 | 0.4730  | 2.6813  |
| C | 2.6222  | 4.5816  | 0.6029  | H | 1.7851  | 5.2343  | 0.3694  |
| C | 4.8045  | 2.9083  | 1.2312  | H | 5.6450  | 2.2624  | 1.4720  |
| C | -1.5045 | 3.8066  | -0.5225 | H | -1.4533 | 3.5867  | -1.5850 |
| C | -0.4762 | 3.3987  | 0.3507  | C | 1.1105  | 1.4144  | -4.2820 |
| H | 1.0633  | 0.5034  | -4.8728 | C | -3.3084 | 0.3876  | -3.1723 |
| H | -2.3829 | -0.1289 | -3.4025 | C | 1.0058  | 1.3399  | -2.8794 |
| H | 0.8836  | 0.3761  | -2.3968 | C | 4.9134  | 4.3032  | 1.4002  |
| H | 5.8386  | 4.7356  | 1.7736  | C | -5.6966 | 1.7246  | -2.5370 |
| H | -6.6189 | 2.2414  | -2.2813 | C | 2.5030  | -1.2345 | 3.0097  |
| C | 6.4637  | -2.8536 | -3.0836 | H | 7.2648  | -3.1267 | -3.7654 |

|   |         |         |         |   |         |         |         |
|---|---------|---------|---------|---|---------|---------|---------|
| C | -4.1839 | 0.7670  | -4.1969 | H | -3.9418 | 0.5422  | -5.2313 |
| C | 6.7609  | -2.6026 | -1.7346 | H | 7.7816  | -2.6785 | -1.3669 |
| C | -2.6135 | 4.5104  | -0.0146 | H | -3.4036 | 4.8270  | -0.6905 |
| C | -2.6975 | 4.8027  | 1.3604  | H | -3.5534 | 5.3493  | 1.7491  |
| C | -1.6717 | 4.3851  | 2.2337  | H | -1.7333 | 4.6078  | 3.2958  |
| C | -0.5624 | 3.6818  | 1.7321  | H | 0.2244  | 3.3627  | 2.4116  |
| O | -1.8197 | -2.5913 | 0.6977  | C | -5.3677 | -3.4030 | 0.0362  |
| H | -6.0312 | -3.5405 | -0.8166 | C | -4.0192 | -3.0743 | -0.1890 |
| C | -3.1186 | -2.8925 | 0.9045  | C | -5.8682 | -3.5619 | 1.3483  |
| H | -6.9114 | -3.8202 | 1.5156  | C | -4.9862 | -3.3898 | 2.4377  |
| H | -5.3512 | -3.5168 | 3.4562  | C | -3.6346 | -3.0611 | 2.2259  |
| H | -2.9558 | -2.9454 | 3.0694  | Y | 0.0468  | -1.3469 | 0.5375  |
| H | -3.6405 | -2.9600 | -1.2026 | F | 0.8378  | -3.3331 | 1.0264  |
| N | -1.2536 | -3.4596 | -2.8787 | O | -2.3352 | -3.0367 | -3.4824 |
| O | -1.2618 | -4.6012 | -2.2443 | H | -3.7540 | 0.9059  | 0.7797  |
| H | 6.9590  | -2.0937 | 0.7281  | H | -5.9644 | 2.0778  | -0.0483 |

**Na<sub>2</sub>H<sub>2</sub>LYF:**

|   |         |         |         |   |         |         |         |
|---|---------|---------|---------|---|---------|---------|---------|
| P | -0.6853 | -2.5454 | 0.2470  | O | 1.4348  | 0.1130  | -1.3653 |
| N | -0.2645 | 1.2779  | 2.6274  | O | -2.1953 | 1.0812  | -1.4055 |
| O | -0.8253 | -0.9246 | 0.3213  | O | -6.1566 | 1.5272  | 0.0335  |
| N | -3.6112 | 1.3622  | 0.3942  | H | -4.6147 | 1.4875  | 0.6722  |
| O | 0.0396  | 2.3542  | -3.3272 | C | -2.0741 | -3.3189 | 1.2207  |
| N | 1.8584  | 0.4444  | 1.2523  | C | -4.4024 | 1.0025  | -3.2100 |
| H | -3.3875 | 0.8894  | -3.5820 | N | 2.8656  | -0.0208 | 0.4403  |
| C | -0.8104 | -4.5120 | -1.8131 | H | -0.6901 | -5.2513 | -1.0252 |
| C | 0.9021  | 1.0792  | 3.3114  | C | -4.5881 | 1.1818  | -1.8128 |
| C | 2.5875  | -0.2045 | -0.8963 | C | -3.3933 | 1.2010  | -0.9551 |
| C | -4.0170 | 1.9329  | 3.1096  | H | -3.9532 | 2.2107  | 4.1609  |
| H | -4.4616 | 2.7817  | 2.5700  | H | -4.7092 | 1.0820  | 3.0257  |
| C | -3.2452 | -2.5646 | 1.4353  | H | -3.3131 | -1.5453 | 1.0661  |
| C | 2.0978  | 0.6888  | 2.5180  | C | 0.9475  | 1.1666  | 4.7205  |
| H | 1.8727  | 1.0086  | 5.2600  | C | -1.4276 | 1.5048  | 3.3102  |
| C | -5.9218 | 1.3446  | -1.2788 | N | -2.5192 | 1.3469  | 1.2292  |
| C | 3.6687  | -0.7729 | -1.7172 | O | 5.2499  | -0.9570 | 0.1409  |
| C | -1.4383 | 1.5996  | 4.7193  | H | -2.3576 | 1.7789  | 5.2614  |
| C | -0.8283 | -3.1330 | -1.5139 | C | 4.9542  | -1.1282 | -1.1608 |
| C | -5.4845 | 0.9722  | -4.0920 | H | -5.3248 | 0.8344  | -5.1578 |
| C | -0.2345 | 1.4424  | 5.4224  | H | -0.2225 | 1.5148  | 6.5058  |
| C | -1.1106 | -3.9864 | -4.1777 | H | -1.2182 | -4.3163 | -5.2082 |
| C | -0.9503 | -4.9359 | -3.1470 | H | -0.9347 | -5.9977 | -3.3793 |
| C | -3.0658 | -5.2108 | 2.3920  | H | -2.9943 | -6.2311 | 2.7602  |
| C | 5.6521  | -1.8690 | -3.4089 | H | 6.4172  | -2.2921 | -4.0573 |
| C | 3.4575  | 0.5310  | 3.1542  | H | 3.5378  | 1.0834  | 4.0912  |
| H | 3.6689  | -0.5282 | 3.3629  | H | 4.2396  | 0.9092  | 2.4852  |
| C | -1.9814 | -4.6432 | 1.6967  | H | -1.0799 | -5.2299 | 1.5405  |
| C | -4.3260 | -3.1370 | 2.1323  | H | -5.2297 | -2.5559 | 2.2984  |
| C | 1.9497  | -3.6484 | 0.1517  | H | 1.8304  | -3.6949 | -0.9268 |
| C | 0.9089  | -3.1713 | 0.9731  | C | -1.1332 | -2.6121 | -3.8714 |
| H | -1.2579 | -1.8778 | -4.6630 | C | 3.4193  | -0.9690 | -3.1016 |
| H | 2.4463  | -0.6868 | -3.4935 | C | -0.9929 | -2.1808 | -2.5381 |
| H | -1.0162 | -1.1215 | -2.3043 | C | -4.2385 | -4.4598 | 2.6102  |
| H | -5.0746 | -4.9010 | 3.1475  | C | 5.9268  | -1.6810 | -2.0516 |
| H | 6.8978  | -1.9529 | -1.6409 | C | -2.6758 | 1.5920  | 2.5059  |
| C | -6.7980 | 1.1275  | -3.5755 | H | -7.6508 | 1.1064  | -4.2516 |

|    |         |         |         |    |         |         |         |
|----|---------|---------|---------|----|---------|---------|---------|
| C  | 4.3884  | -1.5121 | -3.9481 | H  | 4.1805  | -1.6553 | -5.0048 |
| C  | -7.0099 | 1.3094  | -2.2063 | H  | -8.0180 | 1.4296  | -1.8135 |
| C  | 3.1606  | -4.0709 | 0.7330  | H  | 3.9606  | -4.4407 | 0.0970  |
| C  | 3.3343  | -4.0119 | 2.1290  | H  | 4.2693  | -4.3429 | 2.5754  |
| C  | 2.2949  | -3.5250 | 2.9487  | H  | 2.4250  | -3.4776 | 4.0268  |
| C  | 1.0834  | -3.1031 | 2.3734  | H  | 0.2866  | -2.7298 | 3.0126  |
| O  | 1.5244  | 2.8289  | -0.0771 | C  | 5.0430  | 3.8643  | -0.5579 |
| H  | 5.8217  | 3.7927  | -1.3164 | C  | 3.7856  | 3.2879  | -0.8084 |
| C  | 2.7368  | 3.3665  | 0.1590  | C  | 5.3059  | 4.5366  | 0.6575  |
| H  | 6.2794  | 4.9848  | 0.8435  | C  | 4.2768  | 4.6253  | 1.6208  |
| H  | 4.4565  | 5.1476  | 2.5598  | C  | 3.0141  | 4.0519  | 1.3820  |
| H  | 2.2201  | 4.1395  | 2.1220  | Y  | -0.2131 | 1.3931  | 0.0462  |
| Na | -7.6219 | 2.1932  | 1.4716  | H  | 3.5886  | 2.7790  | -1.7494 |
| F  | -1.2015 | 3.3554  | 0.1279  | N  | 1.1614  | 2.9810  | -3.5746 |
| O  | 2.1767  | 2.3278  | -4.0787 | O  | 1.2678  | 4.2571  | -3.3153 |
| H  | 3.8322  | -0.2960 | 0.7374  | Na | 6.8608  | -1.0179 | 1.5715  |

**Table S10:** The coordinates of **NaH<sub>2</sub>LY** as used for the single-point computation

|   |         |         |         |   |         |         |         |
|---|---------|---------|---------|---|---------|---------|---------|
| P | 0.5890  | 1.7036  | 1.4631  | O | -1.4047 | 0.9012  | -1.8960 |
| N | -0.5923 | -2.0941 | 1.0785  | O | 1.9221  | -0.2596 | -1.9350 |
| O | 0.5687  | 0.6590  | 0.3999  | O | 5.5787  | -1.7857 | -0.5975 |
| N | 2.9742  | -1.7332 | -0.5721 | H | 3.6929  | -2.1471 | -0.3450 |
| O | -0.5169 | -0.9991 | -3.6133 | C | 2.1542  | 1.6880  | 2.3490  |
| N | -2.2916 | -0.3137 | 0.1532  | C | 4.2929  | 1.0868  | -2.4851 |
| H | 3.4879  | 1.4287  | -2.8010 | N | -3.0817 | 0.7314  | -0.3281 |
| O | 0.5521  | -2.7031 | -2.8544 | C | 0.4006  | 4.4747  | 1.6263  |
| H | 0.4486  | 4.3563  | 2.5471  | C | -1.8120 | -2.0436 | 1.6582  |
| C | 4.2920  | -0.1106 | -1.7419 | C | -2.5032 | 1.2866  | -1.3689 |
| C | 2.9935  | -0.7088 | -1.4636 | C | 2.8849  | -3.4012 | 1.6943  |
| H | 2.5875  | -3.8941 | 2.4622  | H | 3.3405  | -3.9913 | 1.0909  |
| H | 3.4838  | -2.7043 | 1.9733  | C | 3.2506  | 1.1123  | 1.7359  |
| H | 3.1539  | 0.6983  | 0.9088  | C | -2.7419 | -1.0169 | 1.1291  |
| C | -2.1505 | -2.8828 | 2.7045  | H | -3.0072 | -2.8634 | 3.0641  |
| C | 0.3457  | -2.9130 | 1.6139  | C | 5.5139  | -0.6333 | -1.2498 |
| N | 1.7536  | -2.0770 | -0.0547 | C | -3.1979 | 2.4480  | -1.9699 |
| O | -5.0160 | 2.4501  | -0.4304 | H | -4.5809 | 1.8201  | -0.1352 |
| C | 0.0599  | -3.7588 | 2.6604  | H | 0.7137  | -4.3303 | 2.9952  |
| C | 0.4118  | 3.3544  | 0.7827  | C | -4.3985 | 2.9530  | -1.4976 |
| C | 5.4488  | 1.7511  | -2.7487 | H | 5.4343  | 2.5342  | -3.2493 |
| C | -1.2039 | -3.7494 | -3.2070 | H | -1.4163 | -4.3222 | 3.9069  |
| C | 0.2212  | 5.9023  | -0.2587 | H | 0.1824  | 6.7589  | -0.6173 |
| C | 0.3176  | 5.7376  | 1.1094  | H | 0.3279  | 6.4779  | 1.6724  |
| C | 3.5836  | 2.3416  | 4.1646  | H | 3.6975  | 2.7565  | 4.9900  |
| C | -4.4174 | 4.5839  | -3.2516 | H | -4.8377 | 5.2945  | -3.6800 |
| C | -4.0983 | -0.8465 | 1.7379  | H | -4.2129 | -1.4812 | 2.4486  |
| H | -4.1856 | 0.0430  | 2.0850  | H | -4.7706 | -0.9956 | 1.0662  |
| C | 2.3444  | 2.2802  | 3.5780  | H | 1.6139  | 2.6495  | 4.0213  |
| C | 4.4965  | 1.1505  | 2.3448  | H | 5.2239  | 0.7364  | 1.9366  |
| O | 0.2226  | -2.4864 | -4.9873 | C | -1.8563 | 2.3066  | 2.6585  |
| H | -1.9449 | 2.9509  | 1.9935  | C | -0.7166 | 1.5226  | 2.7035  |
| C | 0.1799  | 4.8088  | -1.1032 | H | 0.0783  | 4.9254  | -2.0202 |
| C | -2.6225 | 3.0417  | -3.1086 | H | -1.8157 | 2.7164  | -3.4366 |
| C | 0.2911  | 3.5178  | -0.5596 | H | 0.2836  | 2.7755  | -1.1203 |
| N | 0.0874  | -2.0789 | -3.8448 | C | 4.6576  | 1.7759  | 3.5072  |
| H | 5.5075  | 1.8332  | 3.8829  | C | -4.9895 | 4.0425  | -2.1367 |



|   |         |         |         |    |         |         |         |
|---|---------|---------|---------|----|---------|---------|---------|
| H | -5.7800 | 4.4012  | -1.8027 | C  | 1.7037  | -2.7959 | 1.0028  |
| C | 6.6590  | 1.2479  | -2.2645 | H  | 7.4540  | 1.6895  | -2.4582 |
| C | -3.2432 | 4.1059  | -3.7483 | H  | -2.8611 | 4.4876  | -4.5053 |
| C | 6.6793  | 0.1157  | -1.5081 | H  | 7.4882  | -0.1737 | -1.1516 |
| C | -2.8549 | 2.1473  | 3.5765  | H  | -3.6102 | 2.6896  | 3.5374  |
| C | -2.7547 | 1.2279  | 4.5180  | H  | -3.4370 | 1.1511  | 5.1452  |
| C | -1.6635 | 0.3703  | 4.6046  | H  | -1.6234 | -0.2895 | 5.2582  |
| C | -0.6007 | 0.5347  | 3.6544  | H  | 0.1484  | -0.0147 | 3.6802  |
| O | -2.0220 | -2.5057 | -1.6254 | C  | -4.0140 | -5.0388 | 0.1288  |
| H | -4.8947 | -5.2077 | 0.3762  | C  | -3.7110 | -3.8736 | -0.6030 |
| C | -2.3726 | -3.6151 | -0.9900 | C  | -3.0429 | -5.9226 | 0.4788  |
| H | -3.2570 | -6.6821 | 0.9701  | C  | -1.7207 | -5.6819 | 0.0977  |
| H | -1.0507 | -6.2749 | 0.3501  | C  | -1.4091 | -4.5840 | -0.6451 |
| H | -0.5323 | -4.4686 | -0.9331 | H  | -4.4883 | -3.1868 | -0.8654 |
| Y | -0.2706 | -0.9517 | -1.1602 | Na | 6.7106  | -3.2756 | -0.8644 |

**Table S11:** The characteristic computational output parameters regarding different isomers of the pristine ligand, **H<sub>4</sub>L**, its doubly deprotonated forms, **H<sub>2</sub>L<sup>2-</sup>**, and the model complexes **NaH<sub>2</sub>YF**, **H<sub>4</sub>YF** and **Na<sub>2</sub>H<sub>2</sub>YF**. The energy-optimized ground state electronic energy of the most stable isomer (**c<sub>2</sub>**) of the pristine ligand **H<sub>4</sub>L** is highlighted in bold with green colour.

|                                       | Ground-state energy<br>(Hartree) ( $\Delta E_{\text{el-c}_2}$ ; kCal) | HOMO energy<br>(Hartree) | LUMO energy<br>(Hartree) | $\Delta E_{\text{LUMO-HOMO}}$<br>(kCal) |
|---------------------------------------|-----------------------------------------------------------------------|--------------------------|--------------------------|-----------------------------------------|
| <b>C<sub>1</sub></b>                  | -1463.649624 (7.5)                                                    | -0.21452                 | -0.06774                 | 92.10489034                             |
| <b>C<sub>2</sub></b>                  | <b>-1463.661515 (0)</b>                                               | -0.23437                 | -0.08505                 | 93.69874796                             |
| <b>C<sub>3</sub></b>                  | -1463.652503 (5.6)                                                    | -0.22948                 | -0.09834                 | 82.29074342                             |
| <b>C<sub>4</sub></b>                  | -1463.6379 (14.8)                                                     | -0.22822                 | -0.09578                 | 83.10649732                             |
| <b>C<sub>5</sub></b>                  | -1463.28007 (239.4)                                                   | -0.22256                 | -0.06459                 | 99.12664891                             |
| <b>C<sub>6</sub></b>                  | -1463.264868 (248.9)                                                  | -0.20779                 | -0.04736                 | 100.6703063                             |
| <b>C<sub>7</sub></b>                  | -1463.626776 (21.8)                                                   | -0.22491                 | -0.08822                 | 85.77338703                             |
| <b>C<sub>8</sub></b>                  | -1463.638065 (14.7)                                                   | -0.2277                  | -0.08984                 | 86.50756358                             |
| <b>H<sub>2</sub>L<sup>2-</sup></b>    | -1462.558863                                                          | -0.01074                 | 0.10716                  | 73.9826037                              |
| <b>NaH<sub>2</sub>LY</b>              | -2870.857993                                                          | -0.14251                 | -0.10227                 | 25.25072072                             |
| <b>H<sub>4</sub>LYF</b>               | -2965.431912                                                          | -0.19255                 | -0.09608                 | 60.53521441                             |
| <b>Na<sub>2</sub>H<sub>2</sub>LYF</b> | -2964.794594                                                          | -0.19071                 | -0.09033                 | 62.98875114                             |

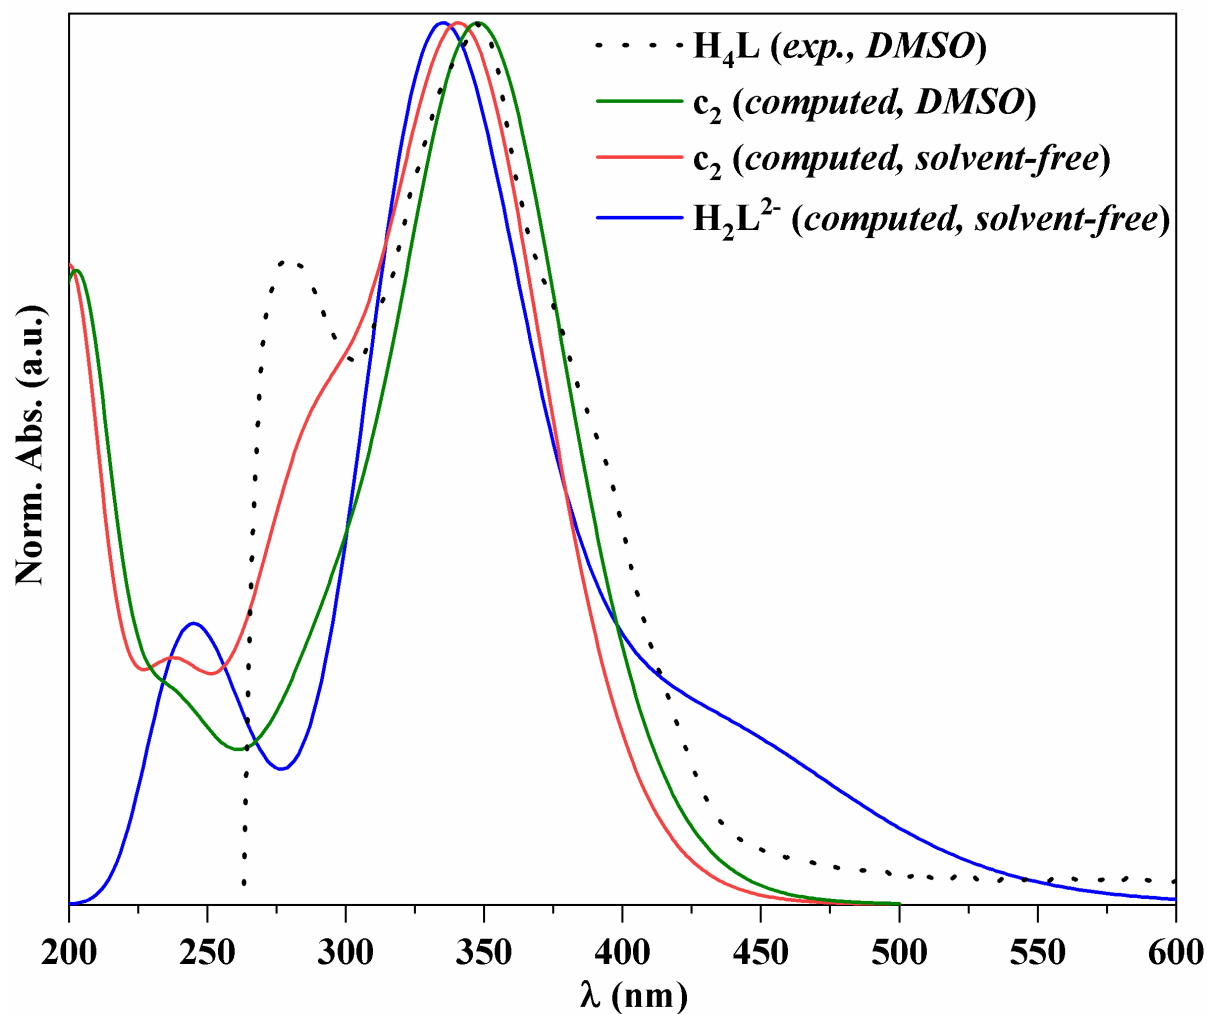

**Figure S36:** The normalized UV-Vis spectra for the energy optimized geometry of  $\mathbf{H_2L^{2-}}$  computed in solvent-free gas-phase (*blue solid line*); the energy optimized geometry of the conformer  $\mathbf{c_2}$  computed in solvent-free gas-phase (*red solid line*); the energy optimized geometry of the conformer  $\mathbf{c_2}$  computed in gas-phase with self-consistent DMSO solvent environment (*green solid line*); and the DMSO solution (see the experimental section for details) of the *as-synthesized* sample of  $\mathbf{H_4L}$  at room temperature (*black dotted line*).

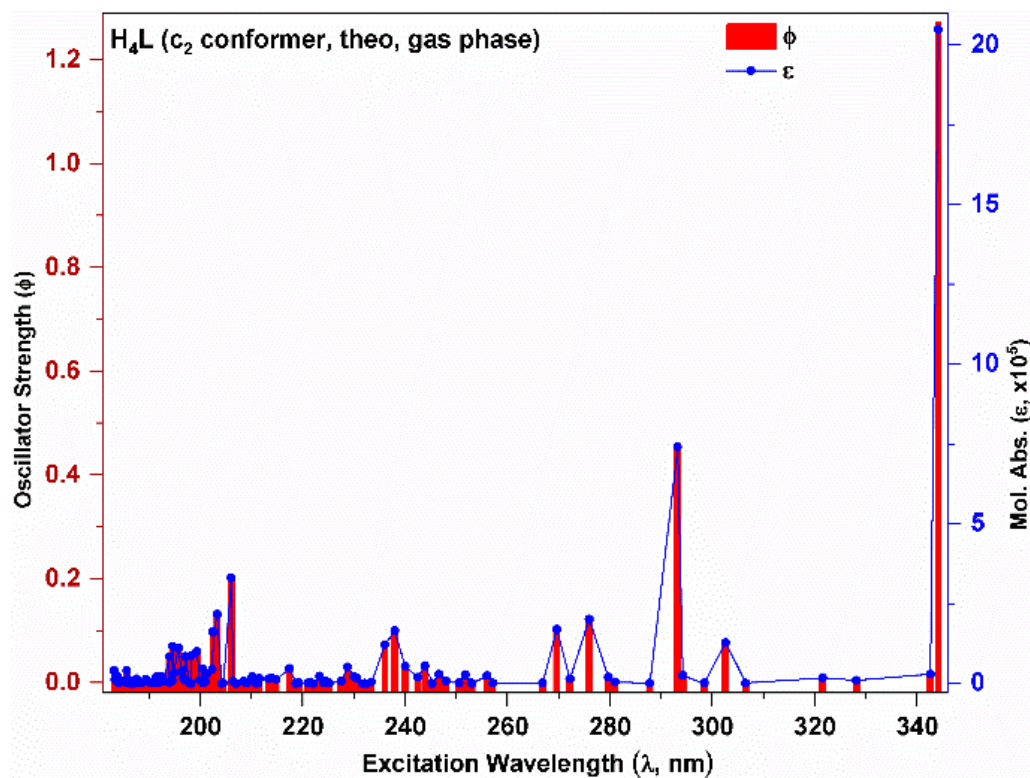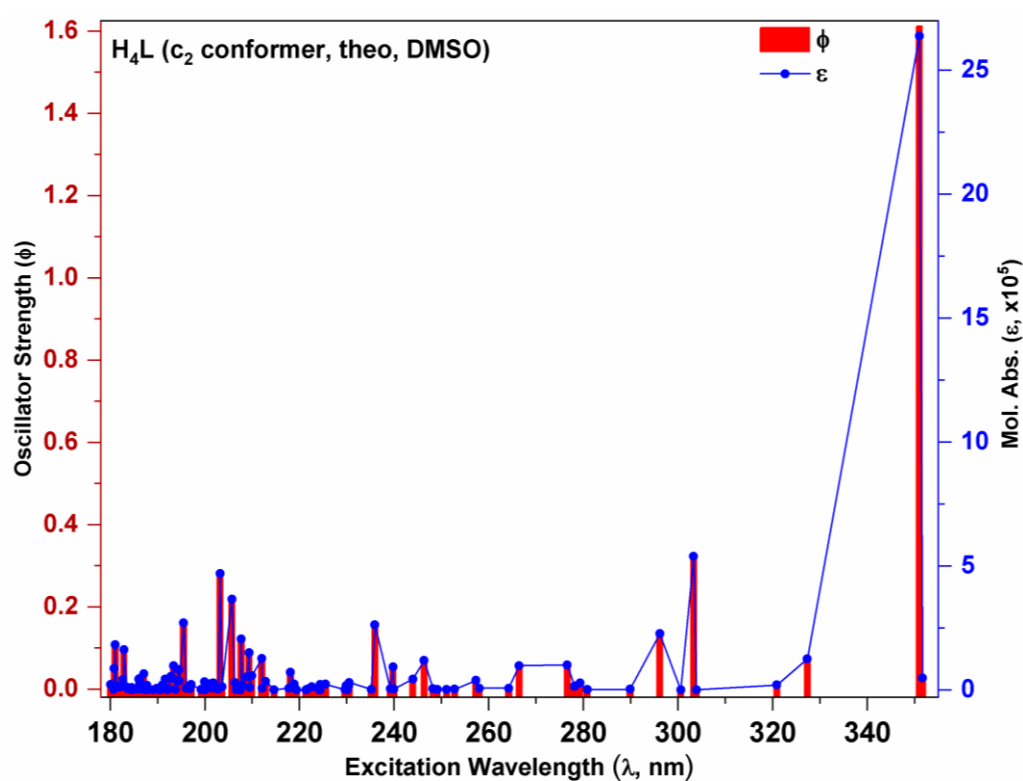

**Figure S37:** The theoretically predicted molar absorption coefficients (solid blue circles) and the associated oscillator strengths (solid red bars) considering 120 frontier electronic transitions associated with the lowest energy conformer ( $c_2$ ) of the pristine ligand **H<sub>4</sub>L** in solvent free gas phase (*top*) and in gas-phase with self-consistent DMSO solvent environment (*bottom*). The solid blue lines are eye-guides only.

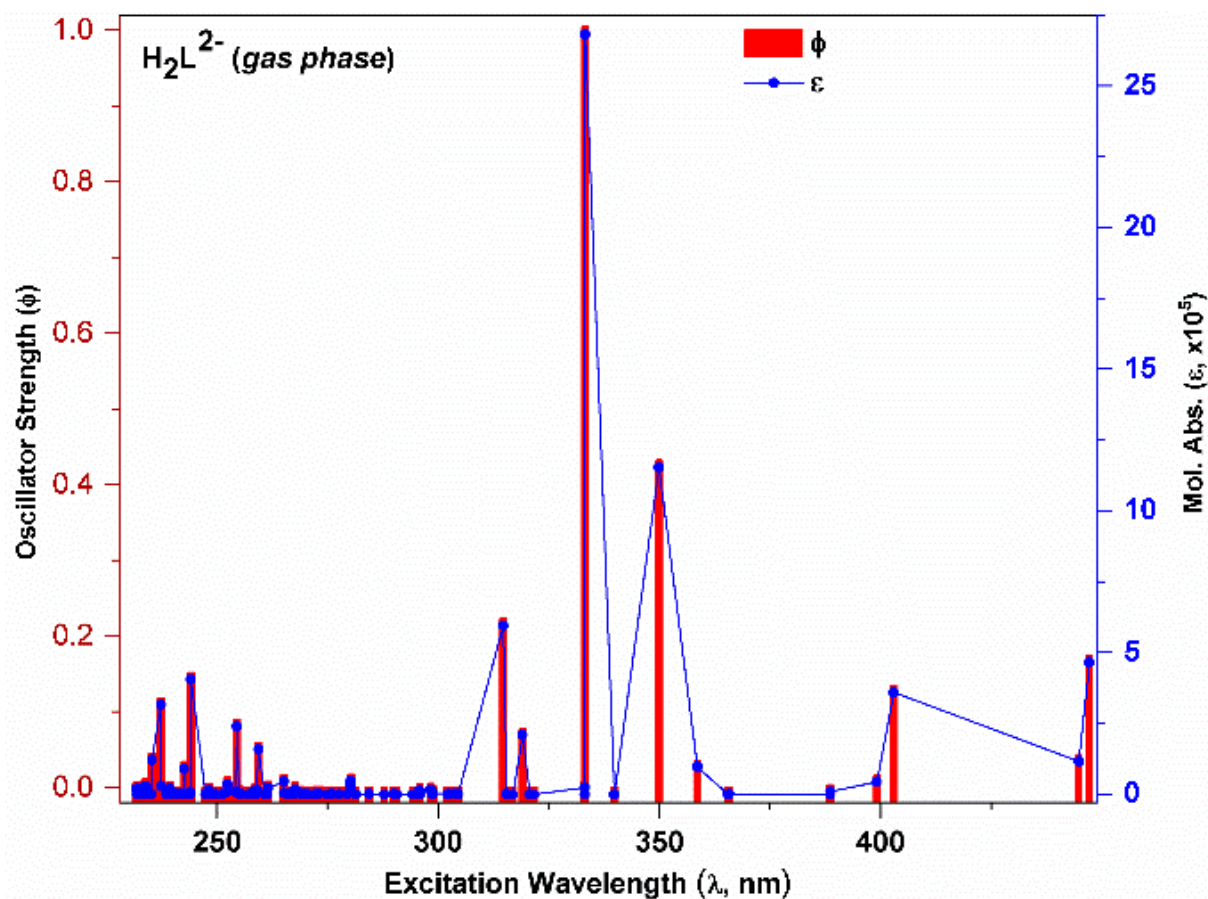

**Figure S38:** The theoretically predicted molar absorption coefficients (solid blue circles) and the associated oscillator strengths (solid red bars) considering 120 frontier electronic transitions associated with the *energy-optimized* geometry of the hypothetical doubly deprotonated dianionic form ( $\text{H}_2\text{L}^{2-}$ ) of the pristine ligand  $\text{H}_4\text{L}$  in solvent-free gas-phase. The solid blue lines are eye-guides only.

**Table S12.** The outputs from the *Continuous Shape Measures* (CShM's) analyses employing the SHAPE program based on the Pinsky-Avnir algorithm for the calculation of continuous shape measures for the [LnN<sub>3</sub>O<sub>6</sub>] nonacoordinate fragments around the Ln centers in the complexes **1·Ln**, and **2·Ln** and the [LnN<sub>3</sub>O<sub>5</sub>F] nonacoordinate fragments around the Ln centers in the energy optimized geometries of the hypothetical monomeric complexes **H<sub>4</sub>LYF** and **Na<sub>2</sub>H<sub>2</sub>LYF** representing the fluorinated congener of **1·Y**. The coordination geometry with the *minimal distortion paths value* with respect to the ideal topology is highlighted in bold with green text for each metal center.

| Complex Polyhedron* | 1·Y          | 1·Gd         | 1·Dy         | 2·Y          | 2·Gd         | 2·Dy         | H <sub>4</sub> LYF | Na <sub>2</sub> H <sub>2</sub> LYF |
|---------------------|--------------|--------------|--------------|--------------|--------------|--------------|--------------------|------------------------------------|
| EP-9                | 29.482       | 29.343       | 29.375       | 35.446       | 35.052       | 35.293       | 31.453             | 30.762                             |
| OPY-9               | 21.338       | 21.111       | 21.237       | 23.271       | 23.446       | 23.313       | 20.638             | 21.262                             |
| HBPY-9              | 17.492       | 17.653       | 17.520       | 15.420       | 15.216       | 15.319       | 15.491             | 16.428                             |
| JTC-9               | 14.182       | 14.514       | 14.209       | 16.358       | 16.348       | 16.336       | 15.829             | 15.508                             |
| JCCU-9              | 7.437        | 7.510        | 7.464        | 8.068        | 8.127        | 8.099        | 7.704              | 7.279                              |
| CCU-9               | 6.241        | 6.318        | 6.254        | 6.736        | 6.771        | 6.762        | 7.218              | 6.728                              |
| JCSAPR-9            | 4.063        | 4.249        | 4.120        | 2.746        | 3.008        | 2.831        | 6.403              | 4.721                              |
| <b>CSAPR-9</b>      | 3.171        | 3.395        | 3.230        | <b>1.807</b> | <b>2.060</b> | <b>1.893</b> | 7.388              | 5.535                              |
| JTCTPR-9            | 4.200        | 4.502        | 4.277        | 4.086        | 4.256        | 4.158        | <b>5.181</b>       | <b>3.575</b>                       |
| TCTPR-9             | 4.246        | 4.325        | 4.288        | 2.582        | 2.796        | 2.656        | 7.726              | 5.694                              |
| JTDIC-9             | 11.371       | 10.838       | 11.296       | 11.310       | 11.164       | 11.291       | 12.377             | 12.624                             |
| HH-9                | 6.062        | 6.003        | 6.036        | 8.707        | 8.403        | 8.656        | 6.008              | 6.915                              |
| <b>MFF-9</b>        | <b>2.664</b> | <b>2.817</b> | <b>2.698</b> | 1.843        | 2.097        | 1.933        | 6.081              | 4.766                              |

\*EP-9: Enneagon (*D*<sub>9h</sub>); OPY-9: Octagonal pyramid (*C*<sub>8v</sub>); HBPY-9: Heptagonal bipyramid (*D*<sub>7h</sub>); JTC-9: Johnson triangular cupola J3 (*C*<sub>3v</sub>); JCCU-9: Capped cube J8 (*C*<sub>4v</sub>); CCU-9: Spherical-relaxed capped cube (*C*<sub>4v</sub>); JCSAPR-9: Capped square antiprism J10 (*C*<sub>4v</sub>); CSAPR-9: Spherical capped square antiprism (*C*<sub>4v</sub>); JTCTPR-9: Tricapped trigonal prism J51 (*D*<sub>3h</sub>); TCTPR-9: Spherical tricapped trigonal prism (*D*<sub>3h</sub>); JTDIC-9: Tridiminished icosahedron J63 (*C*<sub>3v</sub>); HH-9: Hula-hoop (*C*<sub>2v</sub>); MFF-9: Muffin (*C*<sub>s</sub>).

===== THE END =====
